# Supplementary material for: Adverse events associated with paediatric massage therapy: a systematic review
Source: PubMed Central journal article supplement — BMJ Paediatr Open. 2020 Aug 20;4(1):e000584. doi: 10.1136/bmjpo-2019-000584 (PMC7443277; doi:10.1136/bmjpo-2019-000584), 2020-08-20
Supplement: bmjpo-2019-000584.draft_revisions.pdf [file bmjpo-2019-000584.draft_revisions.pdf]

# BMJ Paediatrics Open

BMJ Paediatrics Open is committed to open peer review. As part of this commitment we make the peer review history of every article we publish publicly available.

When an article is published we post the peer reviewers' comments and the authors' responses online. We also post the versions of the paper that were used during peer review. These are the versions that the peer review comments apply to.

The versions of the paper that follow are the versions that were submitted during the peer review process. They are not the versions of record or the final published versions. They should not be cited or distributed as the published version of this manuscript.

BMJ Paediatrics Open is an open access journal and the full, final, typeset and author-corrected version of record of the manuscript is available on our site with no access controls, subscription charges or pay-per-view fees (<http://bmjpaedsopen.bmj.com>).

If you have any questions on BMJ Paediatrics Open's open peer review process please email [info.bmjpo@bmj.com](mailto:info.bmjpo@bmj.com)

# BMJ Paediatrics Open

## Adverse events associated with pediatric massage therapy: a systematic review

|                               |                                                                                                                                                                                                                                                                |
|-------------------------------|----------------------------------------------------------------------------------------------------------------------------------------------------------------------------------------------------------------------------------------------------------------|
| Journal:                      | <i>BMJ Paediatrics Open</i>                                                                                                                                                                                                                                    |
| Manuscript ID                 | bmjpo-2019-000584                                                                                                                                                                                                                                              |
| Article Type:                 | Review                                                                                                                                                                                                                                                         |
| Date Submitted by the Author: | 03-Oct-2019                                                                                                                                                                                                                                                    |
| Complete List of Authors:     | Karkhaneh, Mohamad; University of Alberta<br>Zorzela, Liliane; University of Alberta, Pediatrics<br>Jou, Hsing; University of Alberta<br>Funabashi, Martha; University of Alberta<br>Dryden, Trish; Centennial College<br>Vohra, Sunita; University of Alberta |
| Keywords:                     | Musculo-Skeletal                                                                                                                                                                                                                                               |
|                               |                                                                                                                                                                                                                                                                |

SCHOLARONE™  
Manuscripts

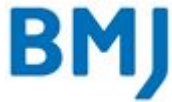

I, the Submitting Author has the right to grant and does grant on behalf of all authors of the Work (as defined in the below author licence), an exclusive licence and/or a non-exclusive licence for contributions from authors who are: i) UK Crown employees; ii) where BMJ has agreed a CC-BY licence shall apply, and/or iii) in accordance with the terms applicable for US Federal Government officers or employees acting as part of their official duties; on a worldwide, perpetual, irrevocable, royalty-free basis to BMJ Publishing Group Ltd ("BMJ") its licensees and where the relevant Journal is co-owned by BMJ to the co-owners of the Journal, to publish the Work in this journal and any other BMJ products and to exploit all rights, as set out in our [licence](#).

The Submitting Author accepts and understands that any supply made under these terms is made by BMJ to the Submitting Author unless you are acting as an employee on behalf of your employer or a postgraduate student of an affiliated institution which is paying any applicable article publishing charge ("APC") for Open Access articles. Where the Submitting Author wishes to make the Work available on an Open Access basis (and intends to pay the relevant APC), the terms of reuse of such Open Access shall be governed by a Creative Commons licence – details of these licences and which [Creative Commons](#) licence will apply to this Work are set out in our licence referred to above.

Other than as permitted in any relevant BMJ Author's Self Archiving Policies, I confirm this Work has not been accepted for publication elsewhere, is not being considered for publication elsewhere and does not duplicate material already published. I confirm all authors consent to publication of this Work and authorise the granting of this licence.

**Adverse events associated with pediatric massage therapy: a systematic review**

Karkhaneh M. GP PhD<sup>1</sup>; Zorzela L, MD PhD<sup>2</sup>; Jou H. MD<sup>3</sup>; Funabashi M. PhD<sup>4</sup>; Dryden T. RMT, M.Ed.<sup>5</sup>; Vohra, S. MD MSc<sup>6</sup>

**Affiliations:**

- 1- Research Associate, Department of Medicine, Faculty of Medicine & Dentistry, University of Alberta
- 2- Assistant Clinical Professor, Department of Pediatrics, Faculty of Medicine & Dentistry, University of Alberta
- 3- Associate Professor, Department of Pediatrics, Faculty of Medicine & Dentistry, University of Alberta
- 4- Post Doctoral student at Department of Pediatrics, Faculty of Medicine & Dentistry, University of Alberta
- 5- Associate Vice President, Research and Corporate Planning, Centennial College, Toronto, ON
- 6- Professor, Department of Pediatrics, Medicine, and Psychiatry, Faculty of Medicine & Dentistry, University of Alberta

**Corresponding author:** Sunita Vohra, Dept of Pediatrics, University of Alberta; 1702 College Plaza, 8215 - 112 Street NW; Edmonton, AB; Canada T6G 2C8; Fax: 780-492-5883; email: svohra@ualberta.ca

**Short title:** Adverse events associated with pediatric massage

**Conflict of interest:** The authors have no conflicts of interest relevant to this article to disclose

**Funding source:** this manuscript received no external funding.

**Abbreviations:**

AE – adverse events

EEG - electroencephalography

GA- Gestational age

MT- massage therapy

RCT- randomized controlled trial

VWM-Volvulus without malrotation

**Table of contents summary:**

Massage therapy is frequently used in children. To date, no study has systematically assessed its safety. This review reports safety of massage in children.

What is known:

- Massage therapy has been widely used for many different indications in children and adults.
- Several studies reports is efficacy, but adverse events of massage therapy is poorly investigated.

What this study adds:

- We identified a range of AEs associated with MT use, from mild to severe.
- No AE were reported when MT was provided by a registered massage therapist.

-Further research is needed to determine if the association of abdominal massage with volvulus without malrotation in preterm infants is causal.

1  
2  
3  
4  
5  
6  
7  
8  
9  
10  
11  
12  
13  
14  
15  
16  
17  
18  
19  
20  
21  
22  
23  
24  
25  
26  
27  
28  
29  
30  
31  
32  
33  
34  
35  
36  
37  
38  
39  
40  
41  
42  
43  
44  
45  
46  
47  
48  
49  
50  
51  
52  
53  
54  
55  
56  
57  
58  
59  
60

1  
2  
3  
4 **Contribution statement:** Dr Vohra and Dr Jou and Dryden conceptualized and designed the study, reviewed  
5 and critically reviewed the manuscript for important intellectual content.

6 Drs Karkhaneh and Zorzela and Funabashi designed the data collection instruments, collected data, carried  
7 out the initial analyses, and drafted the manuscript reviewed and revised the manuscript.

8 All authors approved the final manuscript as submitted and agree to be accountable for all aspects of the work.

9  
10  
11 **All data relevant to the study are included in the article or uploaded as supplementary information.**  
12  
13  
14  
15  
16  
17  
18  
19  
20  
21  
22  
23  
24  
25  
26  
27  
28  
29  
30  
31  
32  
33  
34  
35  
36  
37  
38  
39  
40  
41  
42  
43  
44  
45  
46  
47  
48  
49  
50  
51  
52  
53  
54  
55  
56  
57  
58  
59  
60

**ABSTRACT**

**Introduction:** Massage therapy (MT) is frequently used in children. No study has systematically assessed its safety in children and adolescents. We systematically review adverse events (AEs) associated with pediatric MT.

**Methods:** We searched seven electronic databases from inception to December 2018. We included studies if they: (i) were primary studies published in a peer-reviewed journal, (ii) involved children aged 0-18 years, and (iii) a type of MT was used for any indication. No restriction was applied to language, year of publication, and study design. AEs were classified based on their severity and association to the intervention.

**Results:** Literature searches identified 12,286 citations, of which 938 citations were retrieved for full-text evaluation and 60 studies were included. In the included studies, 31 (51.6%) did not report any information on AEs, 13 (21.6%) reported that no AE occurred, and 16 studies (26.6%) reported at least one AE after MT. There were 20 mild events (grade 1) that resolved with minimal intervention, 26 moderate events (grade 2-3) that required medical intervention, and 18 cases of severe AEs (grade 4-5) that resulted in hospital admission or prolongation of hospital stay; of these, 17 AE were volvulus in premature infants, four of which were ultimately fatal events.

**Conclusion:** We identified a range of AEs associated with MT use, from mild to severe. No AE were reported when MT was provided by a registered massage therapist. Further research is needed to determine if the association of abdominal massage with volvulus without malrotation in preterm infants is causal.

## BACKGROUND

Massage therapy (MT) is one of the most popular complementary therapies in North America and has a long history of practice (1, 2). According to the College of Massage Therapists of Ontario, “Massage therapy consists primarily of hands-on manipulation of the soft tissues of the body, specifically, the muscles, connective tissue, tendons, ligaments and joints for the purpose of optimizing health. Massage therapy treatment has a therapeutic effect on the body and optimizes health and well-being by acting on the muscular, nervous and circulatory systems”(3).

Massage therapists press, rub and manipulate muscles and soft tissues of the body, often with their hands and fingers, to relieve physical dysfunction and pain, reduce stress, promote relaxation, reduce anxiety or depression, and improve general wellbeing(4, 5).

Various types of MTs have been practiced using specific techniques, including Swedish, Thai, shiatsu, tui na, connective tissue, deep tissue, myofascial, trigger point, etc. (6-8).

Massage is used in children around the world, including countries where massage is not part of their traditional medicine practices. Close to 1% of American children use MT (9). In Canada, a survey involving 979 families attending subspecialty clinics, demonstrated that the most common complementary therapy reported was massage, with 39.1% reporting use (10). In Europe, the frequency of massage use varies from 8.7 to 29% in a subpopulation of children with oncologic disorders (11). MT is frequently used in children with health problems and its use is as high as 47% in patients with neurologic disorders, 38% in patients with cardiac disorders and 34% in patients with respiratory disorders (12-14).

Despite MT’s longstanding history and popularity, specific mechanisms by which massage exerts its therapeutic effects are not yet known(7, 15-17). Researchers have long been interested in MT for children’s health and



1 wellbeing (18). A recent meta-analysis of clinical trials of MT on infants under six months of age found  
2 statistically significant effects on weight and height, improving head/arm/leg circumference, 24-hour sleep  
3 duration, lowering blood bilirubin level, and frequency of diarrhea (19). Among preterm infants, MT enhanced  
4 average weight gain and reduced hospital length of stay (20). In children 2-18 years old, MT has been shown to  
5 improve arthritis pain, muscle tone, and decrease anxiety (21). There is limited evidence supporting MT for  
6 cancer pain (22) and chronic pain in children (23).

16 Systematic reviews have focused on the effectiveness of pediatric MT with few attempts to investigate its safety  
17 (24, 25). While many complementary therapies are considered to be at low risk of harm, safety of health  
18 interventions should be measured, rather than assumed, especially in vulnerable populations, including children  
19 (26, 27).

25 The objective of this systematic review was to identify the evidence of adverse events associated with massage  
26 therapy in children.

## 33 **METHODS**

### 35 **Searching Databases**

38 A systematic review was conducted according to the guidelines of the Preferred Reporting Items for Systematic  
39 Review (PRISMA) Statement and the PRISMA Harms (28, 29). In consultation with two massage therapists, a  
40 health research librarian designed a comprehensive search strategy. Seven electronic databases were searched  
41 from inception to December 2018. The databases included: Medline, EMBASE, CINAHL, Cochrane Central  
42 Registry of Controlled Trials, Cochrane Database of Systematic Reviews, PsycINFO, Alt HealthWatch. No  
43 language restrictions were applied. The search strategy was adapted to follow recommendations by Golder &  
44 Loke to optimize for the retrieval of adverse effects data (30). The full Medline search strategy is available in

## Appendix A.

### Study Selection

Studies were eligible to be included if they: 1) were a primary study published in a peer-reviewed journal, 2) involved children from birth to 18 years of age, 3) used MT for any indication. The inclusion of studies was not limited by medical condition, training of massage provider, or the presence/absence of a comparison/control intervention. There was no restriction by study design or reporting AE. We excluded studies if they: 1) only applied light touch or 2) only used self-massage. Studies of reflexology and studies of massage for lacrimal duct obstruction were also excluded since those were not relevant to this review. Case reports were only included if they reported an AE. Two independent reviewers performed study selection and discrepancies were resolved by consensus or a third reviewer.

### Data Extraction

A structured data extraction form was used to collect data from the articles. General characteristics of studies included country, study design, settings, population, age, and gender. Specific information included diagnosis/reason for seeking MT, type of MT, control group, outcome measures, AEs, time between massage and AE, MT provider, and clinical outcome after treating AE. Independent duplicate assessment was performed for both study selection and data extraction.

### Data Synthesis

The data from studies were tabulated into general information and AEs tables. The Common Terminology Criteria for Adverse Events (CTCAE) scale was used to classify severity of AEs (31) (Table 1).

**Table 1: Grading system for severity of adverse events (CTCAE)\***

| <b>Grade 1</b> | Mild; asymptomatic or mild symptoms; clinical or diagnostic observations only; intervention not indicated                                                                                                                                                                       |
|----------------|---------------------------------------------------------------------------------------------------------------------------------------------------------------------------------------------------------------------------------------------------------------------------------|
| <b>Grade 2</b> | Moderate; minimal, local or noninvasive intervention indicated; limiting age-appropriate instrumental Activities of Daily Living (Instrumental ADL: preparing meals, shopping for groceries or clothes, using the telephone, managing money, etc.)                              |
| <b>Grade 3</b> | Severe or medically significant but not immediately life-threatening; hospitalization or prolongation of hospitalization indicated; disabling; limiting self-care ADL (bathing, dressing and undressing, feeding self, using the toilet, taking medications, and not bedridden) |
| <b>Grade 4</b> | Life-threatening consequences; urgent intervention indicated                                                                                                                                                                                                                    |
| <b>Grade 5</b> | Death related to AE                                                                                                                                                                                                                                                             |

The severity was categorized into five *grades*, from *grade 1* (mild, asymptomatic) to *grade 5* (death), based on information provided by the studies. Duplicate assessment of CTCAE ratings were performed and discrepancies between two reviewers were resolved by consulting a senior reviewer.

We also classified the AEs as ‘direct’, if directly caused by the intervention, or ‘indirect’, if the intervention caused a delay in diagnosis or treatment which resulted in an adverse event (32).

Since this was a systematic review of AEs following MT, effectiveness/efficacy of MT was not assessed. We neither performed meta-analysis nor risk of bias assessment. We performed a subgroup analysis by study design

and severity of AE.

## RESULTS

Comprehensive search in seven electronic databases yielded a total of 12,286 citations. Screening titles and abstracts identified 11,348 references irrelevant to the review question; 938 full text articles were retrieved for further evaluation. By using the pre-specified inclusion/exclusion criteria, 60 studies were included (Figure 1).

Included studies were published between 1991 and 2018, and were conducted in 11 countries including China (n=1), France (n=2), Germany (n=1), India (n=3), Iran (n=3), Madagascar (n=1), Malaysia (n=1), Poland (n=1), Russia (n=2), Singapore (n=1), Sweden (n=1) Switzerland (n=2), United States (n=1) and United Kingdom (n=2). Among 60 studies (n=3557), 29 studies (n=1520) were single arm experimental or case studies that received MT and 31 studies (n=2037) were controlled studies, of which almost half (n=972) have received MT and the rest (n=1065) were controls with no MT. Gestational age (GA) in the preterm infants having MT varied was from 23.5 to 37 weeks. Age of children ranged from 1 day to 18 years.

### Reports of Adverse Events

Of 60 included studies, 16 (26.6%) reported AE(s), 31 (51.6%) did not mention if an AE occurred or not, and 13 (21.6%) reported that no AE occurred. Figure 1 illustrates the PRISMA flow diagram.

Of 16 studies (n=438) reporting AEs, 13 were published in English, one in Russian, and two in French. Table 2 reports the different populations and kind of MT used in each study.

### Table 2: characteristics of the included studies reporting adverse effects after massage therapy

| First author (Page 11 of 27 descending) location | Objective                                                                             | Design/Setting                   | Population                            | Age          | Sex, grouping                                                        | Intervention/Expos                                                                                                       | Control                                    | Outcome measures                                                                                                                       | Adverse events                                                                             | Reported conclusion                                                                                                                                                                                |
|--------------------------------------------------|---------------------------------------------------------------------------------------|----------------------------------|---------------------------------------|--------------|----------------------------------------------------------------------|--------------------------------------------------------------------------------------------------------------------------|--------------------------------------------|----------------------------------------------------------------------------------------------------------------------------------------|--------------------------------------------------------------------------------------------|----------------------------------------------------------------------------------------------------------------------------------------------------------------------------------------------------|
| Patel, GM (2017), USA                            | A case of bruise and dry patches on face                                              | Case report/Hospital             | 1 patient                             | 6 wk         | 1M                                                                   | Craniosacral massage for reflux                                                                                          | NA                                         | NA                                                                                                                                     | Bruising & bleeding from dry facial patches & multiple firm occipital subcutaneous lesions | Massage therapy was the cause of superficial bleeding. All newborns should be given prophylactic vitamin K1 shortly after birth.                                                                   |
| Lj, Z. (2015), China                             | A case of multiple bruises on the body                                                | Case report/Forensic office      | 1 patient                             | 5 yr         | 1M                                                                   | Traditional Chinese massage "Ba Sha" involves pinching skins between thumb and index finger on the neck, chest, and back | NA                                         | NA                                                                                                                                     | Bruising                                                                                   | Traditional Chinese massage therapy may result in striking lesions of the skin which may raise concern about child abuse.                                                                          |
| Moss, C. (2014), Germany                         | Assessing risk factors of volvulus without malrotation (VWM) in pre-term infants      | Case-control/University hospital | 5 extreme preterm infants/25 controls | 37-52 d      | 5F with VWM and small for GA in case; 13M with VLBW, 12 F in control | Abdominal massage on preterm infants to stimulate peristalsis                                                            | Matched infants but not exposed to massage | Last meconium evacuation, number of enemas, number of manipulation with rectal tubes, frequency of abdominal massage, number of stools | Intestinal volvulus                                                                        | Infants with volvulus had significantly more frequency of rectal tube manipulations but no difference in enema, abdominal massage or defecation, massage did not show to be a risk factor for VWM. |
| Massodi, T. (2014), India                        | Assessing prevalence and risk factors of neonatal mastitis                            | Case series/Hospital             | 32                                    | 6-48 d       | NS, only 15 of 32 babies had received massage                        | Breast massage to express the secretions and downsize breast hypertrophy                                                 | NA                                         | NA                                                                                                                                     | Mastitis                                                                                   | Parental counselling to prevent breast massage in babies for breast hypertrophy which is benign and settled spontaneously in most babies.                                                          |
| Zweifel, N. (2013), Switzerland                  | Case series of preterm infants with intestinal volvulus with necrotic small intestine | Case series/Hospital             | 3 preterm infants                     | 26, 27, 32 d | NS, 3 had volvulus without malrotation                               | Abdominal massage or pelvic rotation to stimulate peristalsis by nurses                                                  | NA                                         | NA                                                                                                                                     | Intestinal volvulus                                                                        | Long-lasting rotary forces generated by massaging can reach to small bowel through very thin abdominal wall leading to volvulation: "manufactured" volvulus.                                       |
| Rudnicki, J. (2012), Poland                      | Assessing direct effects of massage on physiological                                  | Single-arm experime              | 39 preterm infants                    | 18-24 days   | NS, 22 infants 28-37 wk, and 17 infants >32 wk                       | Shantala massage (stroking & rubbing) in entire body for                                                                 | NA                                         | aEEG, SaO2, Pulse Rate, CCFM, and cerebral blood flow                                                                                  | Oxygen desaturation <85%                                                                   | Monitoring aEEG, SaO2, and pulse increases the safety of massage in preterm infants                                                                                                                |

|   |                                                |                                                                                                                                      |                                   |                                             |                                     |                                                                                                             |                                                                                                                                              |                                    |                                                                                                                    |                                      |                                                                                                                                                                                                                  |
|---|------------------------------------------------|--------------------------------------------------------------------------------------------------------------------------------------|-----------------------------------|---------------------------------------------|-------------------------------------|-------------------------------------------------------------------------------------------------------------|----------------------------------------------------------------------------------------------------------------------------------------------|------------------------------------|--------------------------------------------------------------------------------------------------------------------|--------------------------------------|------------------------------------------------------------------------------------------------------------------------------------------------------------------------------------------------------------------|
| 1 | parameters of preterm infants                  | ntal /Hospital                                                                                                                       |                                   |                                             | GA                                  | ~17 minutes                                                                                                 |                                                                                                                                              | assessed by the Doppler technique  |                                                                                                                    | one might be desaturation below 85%. |                                                                                                                                                                                                                  |
| 2 | <b>Guilbert J. et al (2007), France</b>        | A case of severe epilepsy after pediatric massage with topical oil containing Camphor                                                | Case report/Hospital              | 1                                           | 4 mo                                | 1F                                                                                                          | Abdominal massage with anti-flatulence solution containing Camphor                                                                           | NA                                 | NA                                                                                                                 | Status epilepticus                   | Topical lotions should be free of any toxic chemicals such as Camphor; clinicians must keep this in mind examining similar cases.                                                                                |
| 3 | <b>Razafimahandy, H.J. (2007), Madagascar</b>  | Reporting series of humeral osteomyelitis due to Staphylococcus aureus infection expanded by massage                                 | Case series/University hospital   | 4                                           | 5-11 yr                             | 2M, 2F                                                                                                      | Local traditional massage                                                                                                                    | NA                                 | NA                                                                                                                 | Spreading local infection            | Traditional massage can spread the local infection and delay of treatment can lead to severe functional sequelae.                                                                                                |
| 4 | <b>Paraskevopoulos, E. (2006), Switzerland</b> | Two cases of intestinal volvulus in preterm infants                                                                                  | Case series/Hospital              | 2                                           | 19d,32 d                            | 2F, both infants 27 wk GA                                                                                   | Intensive abdominal massage for stimulating peristalsis                                                                                      | NA                                 | NA                                                                                                                 | Intestinal volvulus                  | Repeated intensive abdominal massage can be a risk factor for intestinal volvulus.                                                                                                                               |
| 5 | <b>Solanki, K. (2005), India</b>               | Assessing transcutaneous absorption of topical oil in neonatal massage                                                               | RCT/hospital                      | 118 infants in 3 groups of 39, 40, 39.      | Range 1-4 days; mean (SD)=1.5 (0.7) | Mean=35 wk GA                                                                                               | Whole body massage with 5 ml oil (Safflower and coconut) for 10 minutes 4 times a day, for 5 days by a trained person                        | Same massage with no oil           | Serum triglycerides, fatty acids (Linoleic acid, Arachidonic acid, Alpha Linolenic acid, Docosa- hexaenoic acid)   | Skin rash                            | Fatty acid in oil can be absorbed from the skin and change fatty acid profiles of babies. Safflower oil may cause rash in babies' skin.                                                                          |
| 6 | <b>Sankaranarayanan, K. (2005), India</b>      | Assessing the effects of massage with coconut or mineral oil on growth, neuro-behavior, and side effects on preterm and term infants | RCT/Tertiary care center          | 224 infants into 3 groups of 76, 74, and 74 | 2 days old                          | In 3 coconut, mineral and no-oil groups babies were half term ( $\geq 37$ wk) and half preterm ( $< 37$ wk) | Whole body massage using mineral and coconut oil by trained person from day 2 until discharge and thereafter by trained mother until 31 days | Same massage with baby powder only | Weight, head circumference, and length of infants were measured daily until discharge and every week until 31 days | Skin rash                            | Massage with coconut oil improves weight gain velocity in preterm and term babies. Mild transient skin rash was observed in babies in three groups of coconut, mineral and placebo over the course of the trial. |
| 7 | <b>Cullen, L.A. (2005), UK</b>                 | Exploring effects of touch between parents and children with autism                                                                  | Single-arm experimental/community | 15 Autistic children with parents           | 1-9 yr, median =3                   | 13M, 2F                                                                                                     | 1-hour whole body touch with gentle stroking weekly/8 wk by therapist and daily by parents                                                   | NA                                 | Children response to touch                                                                                         | Hyperactivity                        | Parents consistently expressed a "sense of closeness" with their autistic children after 16-week of practice.                                                                                                    |
| 8 | <b>Billemaz, K. (2001), France</b>             | Case series of intestinal volvulus in preterm infants                                                                                | Case series/Hospital              | 7 preterm infants                           | 27-29 wk                            | 1M, 6F                                                                                                      | Abdominal massage with lubricants/3 hours to stimulate                                                                                       | NA                                 | NA                                                                                                                 | Intestinal volvulus                  | Abdominal wall massage identified as a risk factor for intestinal volvulus in preterm                                                                                                                            |

|                            |                                        |                                                                                      |                    |           |       |                                              |                                                                          |    |    |                                            |                                                                                                                                                                    |
|----------------------------|----------------------------------------|--------------------------------------------------------------------------------------|--------------------|-----------|-------|----------------------------------------------|--------------------------------------------------------------------------|----|----|--------------------------------------------|--------------------------------------------------------------------------------------------------------------------------------------------------------------------|
|                            |                                        |                                                                                      |                    |           |       | peristalsis                                  |                                                                          |    |    | infants.                                   |                                                                                                                                                                    |
| 1<br>2<br>3<br>4<br>5      | <b>Kalinga, M.J. (1996), Singapore</b> | A case of popliteal artery pseudo-aneurysm in a patient with multiple osteochondroma | Case report/Clinic | 1 patient | 16 yr | 1M                                           | Local massage on bone lesion by a traditional Chinese healer for 5 times | NA | NA | Popliteal artery pseudo-aneurysm           | No massage therapy recommended over osteochondroma on distal medical aspect of femur.                                                                              |
| 6<br>7<br>8<br>9           | <b>Ram, S.P. (1994), Malaysia</b>      | A case of bilateral hematoma testes                                                  | Case report/Clinic | 1 patient | 1 d   | 1M, born at home                             | Local traditional massage and warm sand bag on hydrocele                 | NA | NA | Hematoma/swelling of testicles             | Any manipulation of infant scrotum can traumatize the testes or blood vessels.                                                                                     |
| 10<br>11<br>12<br>13<br>14 | <b>Medvedev, E. (1994), Russia</b>     | A case of acute unilateral neurosensory hearing loss after massage therapy           | Case report/Clinic | 1 patient | 14 yr | 1M with autonomic nervous system dysfunction | Local massage on neck area and trapezius muscle                          | NA | NA | Acute unilateral neurosensory hearing loss | Massage of trapezius muscle may have initiated vascular spasm through autonomic nervous system which caused low blood perfusion to Cochlea and acute hearing loss. |

15 Footnote: GA: gestational age; HR: heart rate; BP: blood pressure; RR: respiratory rate; NA: not applicable; NS: not stated; RCT: randomized controlled trial; VWM: volvulus without malrotation; VLBW: very low birth  
16 weight; aEEG: amplitude-integrated electroencephalography; CCFM: color cerebral function monitor; RISS: Rice infant sensorimotor stimulation is eye-to-eye contact, auditory stimulation, cephalocaudal massage for 10  
17 minutes, rocking or vestibular stimulation for 5 minutes; F: female; M: male; yr: year; mo: month, wk: week; d: day; TSP: Training and Support Program.

1 In total, 11 different types of AEs occurred in 64 individuals. Of 16 studies reporting an AE, five did not state  
2 who performed the massage therapy. Of the 11 that reported, MT was provided by trained nurses (n=2),  
3 parents/grandparents (n=1), paramedic personnel (n=1), nanny (n=1), traditional massage practitioner (n=1),  
4 and trained massage practitioner (n=5). Of all, only one study described the providers' experience or  
5 qualifications regarding massage therapy (33). In some cases, a nurse or trained massage practitioner started  
6 MT, and a parent continued the massage. None of the studies reported any AE associated with MT when it was  
7 provided by a licensed or registered massage therapist (Tables 3-5).  
8  
9  
10  
11  
12  
13  
14  
15  
16  
17

### 18 Indirect Adverse Event

19 One publication identified an indirect AE, i.e., a delay in diagnosis and/or treatment. A case report documented  
20 four children with *Staphylococcus aureus* osteomyelitis, which presented as upper arm swelling (34). The  
21 authors considered the use traditional MT for swelling a cause for delay in the diagnosis and treatment, leading  
22 to progression of the infection (Grade 3).  
23  
24  
25  
26  
27  
28  
29  
30  
31

### 32 **Adverse Events and severity**

#### 33 **Serious AE (Grades 4-5)**

34 Five included studies reported 18 cases of serious AEs after MT (35-39).  
35  
36

37 Seventeen pre term infants (15 females and two males) were diagnosed with intestinal volvulus without  
38 malrotation after abdominal massage. The MT were usually performed 4-8 times per day by nurses to stimulate  
39 peristalsis in preterm (27-31 week gestational age), and extremely preterm (>23.5 and <27 weeks gestational  
40 age) infants. The intestinal volvulus occurred from 13 days to 52 days after birth. Four infants died (Grade 5)  
41 and 13 survived after bowel resection surgery (Grade 4). A retrospective case control study done by Maas (28),  
42 reports five extremely pre term infants (GA 24.4 weeks) with volvulus without malrotation. Each case was  
43  
44  
45  
46  
47  
48  
49  
50  
51  
52  
53  
54  
55  
56  
57  
58  
59  
60



1 matched with five other pre term infants with similar birth weight, GA and birth year. Three of the five patients  
2 with volvulus died. Maas reports that MT was not found to be risk factor for the volvulus, as both cases and  
3 controls received massage similarly.  
4

5  
6  
7 In addition, a serious AE also occurred in a 4-month old female who had status epilepticus due to camphor  
8 intoxication, following abdominal massage with camphor-containing lotion. She was hospitalized for 72 hours  
9 for uncontrolled seizures, where she was intubated, mechanically ventilated, and given seizure treatment (Grade  
10  
11  
12 4) (Table 3).  
13  
14  
15  
16  
17  
18  
19  
20  
21  
22  
23  
24  
25  
26  
27  
28  
29  
30  
31  
32  
33  
34  
35  
36  
37  
38  
39  
40  
41  
42  
43  
44  
45  
46  
47  
48  
49  
50  
51  
52  
53  
54  
55  
56  
57  
58  
59  
60

**Table 3: Severe adverse events (Grade 4-5) in pediatric massage therapy (n=18)**

| First author (Year), location                 | Indication for treatment                              | AE                 | N of events | Age/weight                        | Age at AE                                                | Gender     | Type of MT                                       | MT practitioner      | Outcome                                                           | Notes from the authors                                                                                                                       |
|-----------------------------------------------|-------------------------------------------------------|--------------------|-------------|-----------------------------------|----------------------------------------------------------|------------|--------------------------------------------------|----------------------|-------------------------------------------------------------------|----------------------------------------------------------------------------------------------------------------------------------------------|
| <b>Case-control</b>                           |                                                       |                    |             |                                   |                                                          |            |                                                  |                      |                                                                   |                                                                                                                                              |
| Maas, C. (2014), Germany                      | To stimulate peristalsis in extremely preterm infants | VWM                | 5           | 23.6-25.4 weeks GA; 370-630 grams | 37-52 d after birth                                      | 5 F        | Abdominal massage 4-6 times/day                  | NS                   | 3 Died (Grade 5)<br>2 Survived after surgery (Grade 4)            | Data did not support the hypothesis that abdominal massage was a risk factor for VWM                                                         |
| <b>Case series</b>                            |                                                       |                    |             |                                   |                                                          |            |                                                  |                      |                                                                   |                                                                                                                                              |
| Zweifel, N. et al. (2013), Switzerland        | To stimulate peristalsis in preterm infants           | VWM                | 3           | 27-31 weeks GA; 880 grams         | NS                                                       | 2 F<br>1 M | Repeated abdominal massage multiple times a day  | Nurse                | 3 survived after surgery (Grade 4)                                | There may be a causal relationship between abdominal massage and VWM; no further cases were diagnosed after the practice was discontinued    |
| Paraskevopoulos E. et al. (2006), Switzerland | To stimulate peristalsis                              | VWM                | 2           | 27 weeks GA                       | At 19 <sup>th</sup> and 32 <sup>nd</sup> day after birth | 2 F        | Intensive abdominal massage every 3 hours        | Nurse                | 2 survived after surgery (Grade 4)                                | The infants had no other risk factors other than the abdominal massage; the practice was discontinued with no further cases since            |
| Billiemaz, K. (2001), France                  | To stimulate peristalsis                              | VWM                | 7           | 27-29 weeks GA: 660-1100 grams    | Day 13-33                                                | 6 F<br>1 M | Abdominal massage                                | Health care provider | 1 died (Grade 5)<br>6 survived after surgery (Grade 4)            | No new cases of VWM were seen after the practice was discontinued                                                                            |
| <b>Case report</b>                            |                                                       |                    |             |                                   |                                                          |            |                                                  |                      |                                                                   |                                                                                                                                              |
| Guilbert J. et al. (2007), France             | Flatulence                                            | Status epilepticus | 1           | 4 months                          | 72 hours                                                 | 1 F        | Abdominal massage with camphor-containing lotion | Caregiver            | Hospitalized, intubated, treated for status epilepticus (Grade 4) | Other investigations were normal; the infant was extubated after three days and later discharged home with a normal neurological examination |

Footnote: AE: adverse event; MT: massage therapy; VWM: volvulus without malrotation; GA: gestational age; wk: week; NS: not stated; F: female; M: male.

**Moderate AEs (Grade 2-3)**

1  
2  
3 There was one trial (CCT) (40), two case series (34, 41) and four case reports(42-45) from 1994 to 2017  
4  
5 reporting on 27 children, aged from 1-day to 16 years old. All children experienced moderate AEs including  
6  
7 infant mastitis/abscess, osteomyelitis, popliteal artery pseudo-aneurysm, acute unilateral neurosensory hearing  
8  
9 loss, scrotal hematoma, and oxygen desaturation. The CCT (40) assessed physiological measurements including  
10  
11 amplitude-integrated electroencephalography (aEEG), oxygen saturation (SaO<sub>2</sub>), pulse rate, and cerebral blood  
12  
13 flow in 39 preterm infants following whole body Shantol (stroking and rubbing whole body) massage by a  
14  
15 therapist and the mother. They reported four cases of oxygen desaturation (<85%) requiring withdrawal from  
16  
17 the experiment (Grade 2); no further details were provided. One case series (41) described 15 cases of neonatal  
18  
19 mastitis following repeated massage in 15 infants aged 6-48 days; all cases needed antibiotic therapy with or  
20  
21 without abscess drainage (Grade 3).  
22  
23

24  
25 Three case reports of MT AE were also published: (i) a popliteal artery pseudo aneurysm after leg MT on an  
26  
27 osteochondroma in a 16-year old male (43); (ii) acute unilateral neurosensory hearing loss after MT on the neck  
28  
29 and trapezius muscle in a 14-year old male diagnosed with autonomic nervous system dysfunction (44); and (iii)  
30  
31 scrotal hematoma after traditional MT with a warm sand bag on hydrocele of a 1-day old baby boy (45). The  
32  
33 first and third cases resolved after hospitalization and appropriate surgery and second case resolved after  
34  
35 intensive treatment plan at a hospital for 15 days and at home for seven days (Grade 3) (Table 4).  
36  
37  
38  
39  
40  
41  
42  
43  
44  
45  
46  
47  
48  
49  
50  
51  
52  
53  
54  
55  
56  
57  
58  
59  
60

**Table 4: Moderate adverse events (Grade 2-3) in pediatric massage therapy (n=26)**

| First author (Year), location           | Indication for treatment                                    | AE                                                     | N of events                                                    | Age                                                     | Time of AE                     | Gender     | Type of MT                                      | MT practitioner                           | Outcome                                                                                                 | Notes from the authors                                                                                                                                                                                                                         |
|-----------------------------------------|-------------------------------------------------------------|--------------------------------------------------------|----------------------------------------------------------------|---------------------------------------------------------|--------------------------------|------------|-------------------------------------------------|-------------------------------------------|---------------------------------------------------------------------------------------------------------|------------------------------------------------------------------------------------------------------------------------------------------------------------------------------------------------------------------------------------------------|
| <b>CCT</b>                              |                                                             |                                                        |                                                                |                                                         |                                |            |                                                 |                                           |                                                                                                         |                                                                                                                                                                                                                                                |
| Rudnicki, J. (2012), Poland             | Assessing the physiologic effects* of MT in preterm infants | Arterial oxygen desaturation <85%                      | 4/39                                                           | 39 preterm infants, 22 <32 weeks GA and 17 ≥32 weeks GA | 18 days (n=17), 24 days (n=22) | 5 F        | Shantala (stroking and rubbing whole body)      | Therapist/mother                          | Withdrawn from the study (Grade 2)                                                                      | No other information was given by the authors about management or resolution of this AE                                                                                                                                                        |
| <b>Case series</b>                      |                                                             |                                                        |                                                                |                                                         |                                |            |                                                 |                                           |                                                                                                         |                                                                                                                                                                                                                                                |
| Masoodi, T. (2014), India               | Breast hypertrophy (12 mastitis and 20 abscess)             | Mastitis and breast abscesses                          | 15/30 received MT to express secretions for breast hypertrophy | 6-48 days                                               | NS                             | NS         | Repeated breast massage                         | NS                                        | Resolved after antibiotic therapy/drainage of abscess (Grade 3)                                         | Massage for neonatal breast hypertrophy should not be performed                                                                                                                                                                                |
| Razafimahandry, H.J. (2007), Madagascar | Upper arms osteomyelitis (Staphylococcus aureus)            | Severe infection due to delayed diagnosis (20-60 days) | 4                                                              | 5-11 years                                              | NS                             | 2 F<br>2 M | Traditional massage                             | NS                                        | 3 cases resolved after hospitalization and antibiotic therapy (Grade 3)                                 | One case was a severely cachectic 11 year old boy diagnosed with pulmonary tuberculosis and died of septic shock five days later; no other details regarding his death was described                                                           |
| <b>Case report</b>                      |                                                             |                                                        |                                                                |                                                         |                                |            |                                                 |                                           |                                                                                                         |                                                                                                                                                                                                                                                |
| Kalinga, M.J. (1996), Singapore         | Swelling of right thigh due to osteochondroma               | Popliteal artery pseudoaneurysm                        | 1                                                              | 16 years                                                | 3rd session of massage         | M          | MT with herbal medicine (5 sessions)            | Traditional Chinese Medicine practitioner | Resolved after hospitalization and surgery (Grade 3)                                                    | Diagnosis was right popliteal artery pseudoaneurysm after the 5 <sup>th</sup> session of MT. At surgery femoral artery defect was found adjacent to the osteochondroma                                                                         |
| Medvedev, E. (1994), Russia             | Autonomic nervous system dysfunction                        | Acute unilateral neurosensory hearing loss             | 1                                                              | 14 years                                                | During treatment               | M          | Tonic MT of the neck including trapezius muscle | NS                                        | Recovered with hospitalization; medications plus "5 sessions of TENS** for 8th cranial nerve" (Grade 3) | The boy with ANS dysfunction received MT and developed acute unilateral neurosensory hearing loss with noise. MT stimulated the ANS and caused vascular spasm leading to decreased blood flow to the cochlea and subsequent hearing impairment |
| Ram, S.P. (1994), Malaysia              | Hydrocele                                                   | Scrotal hematoma                                       | 1                                                              | 1 day                                                   | 1st day                        | M          | Traditional MT to testes with warm sand bag     | NS                                        | Resolved after surgery (Grade 3)                                                                        | None                                                                                                                                                                                                                                           |

Footnote: AE: adverse event; CCT: controlled clinical trial; MT: massage therapy; GA: gestational age; NS: not stated; F: female; M: male; TENS: transcutaneous electrical nerve stimulation; ANS: autonomic nervous system; \* amplitude-integrated electroencephalography (aEEG), oxygen saturation (SaO<sub>2</sub>), pulse rate, and cerebral blood flow.

**Mild AE (Grade 1)**

Two RCTs (46, 47) described skin rashes after whole body massage with various oils (almond, mineral, coconut, or safflower) examining the effects of MT on growth measurements (weight, height, etc.) in 17 infants with age from 1-day to 3-days old. These mild reactions occurred in 2.5% in the first (46) and 6% in the second (47) study populations; all resolved spontaneously without discontinuation of MT or the oils (Grade 1). Two almost identical RCTs (48, 49) examined the immunogenicity of mild rubbing massage on vaccination sites among 808 and 328 infants 2-6 months old, respectively. AEs included crying, anorexia, drowsiness, vomiting, irritability, fever, pain, redness, and induration; all were mild and did not need an intervention except general health advice for vaccinated children (Grade 1). Two single-arm experimental studies, one by Cullen et al., (33) described mild hyperactivity (n=1) and the other by Beaver et al., (50) reported increased blood pressure/heart rate and decreased transcutaneous oxygen saturation (n=8) following MT. One case report by Li et al., (51) described a mild skin bruising after a MT technique involving pinching skin. All of these interventions needed minimal intervention for resolution (Grade 1) (Table 5).

**Unclassified AEs**

Due to insufficient information, we were unable to properly assess and rate the severity of AE reported by a CCT. Goncharove et al (52) assessed the effect of MT with a mixture of aromatic oils on CNS rehabilitation among 31 infants aged 4-18 months with perinatal hypoxic central nervous system (CNS) injury. One child (age and sex not provided) developed an “allergic reaction” (oil product not specified) and dropped out of the study (no further details were provided to allow for severity rating). The manuscript was written in Russian and author’s contact information was not available (Table 5).

**Table 5: Mild adverse events (Grade 1) in pediatric massage therapy +unclassified severity (n=20)**

1  
2  
3  
4  
5  
6  
7  
8  
9  
10  
11  
12  
13  
14  
15  
16  
17  
18  
19  
20  
21  
22  
23  
24  
25  
26  
27  
28  
29  
30  
31  
32  
33  
34  
35  
36  
37  
38  
39  
40  
41  
42  
43  
44  
45  
46  
47  
48  
49  
50  
51  
52  
53  
54  
55  
56  
57  
58  
59  
60

|                                | First author (Year), location       | Indication for treatment                                             | AE                               | N of events | Age      | Time of AE       | Gender       | Type of MT                                                     | MT practitioner           | Outcome                                                          | Notes                                                                                                                                                                                                                                                             |
|--------------------------------|-------------------------------------|----------------------------------------------------------------------|----------------------------------|-------------|----------|------------------|--------------|----------------------------------------------------------------|---------------------------|------------------------------------------------------------------|-------------------------------------------------------------------------------------------------------------------------------------------------------------------------------------------------------------------------------------------------------------------|
| <b>RCT</b>                     |                                     |                                                                      |                                  |             |          |                  |              |                                                                |                           |                                                                  |                                                                                                                                                                                                                                                                   |
|                                | Solanki, K. (2005), India           | Examining MT with oil on growth and fatty acid profile of the infant | skin rash                        | 3/118       | 1-3 days | 3rd and 4th days | 47 F<br>71 M | Massage with safflower oil for 10 min, 4 times/day over 5 days | Trained massager          | Resolved spontaneously (Grade 1)                                 | The rash resolved without treatment in 1-2 days despite continuing the oil massage                                                                                                                                                                                |
|                                | Sankarana rayanan, K. (2005), India | Examining MT with oil on weight and growth and AE                    | skin rash                        | 14/224      | 2 days   | NS               | NS           | Massage 5 minutes 4/day with coconut/mineral oil or no oil     | Trained person and mother | Resolved spontaneously (Grade 1)                                 | Massage in hospital and home continued for 30 days; mild rash occurred equally in all groups, coconut oil (n=5), mineral oil (n=5), and placebo (n=4), and did not require discontinuation of massage                                                             |
| <b>Single-arm experimental</b> |                                     |                                                                      |                                  |             |          |                  |              |                                                                |                           |                                                                  |                                                                                                                                                                                                                                                                   |
|                                | Cullen, L.A.(2005), UK              | Examining MT on communication of autistic child                      | Worsened hyperactivity           | 1           | NS       | After 24 hours   | M            | 1-hour weekly MT for 8 times by massager and daily by parent   | Therapist and parents     | No major complication (Grade 1)                                  | Eight other participants (2-13 years old, all with autism) who completed the study over eight weeks reported "no obvious negatives"                                                                                                                               |
| <b>Case report</b>             |                                     |                                                                      |                                  |             |          |                  |              |                                                                |                           |                                                                  |                                                                                                                                                                                                                                                                   |
|                                | Patel, GM (2017), USA               | Examining of MT for reflux                                           | Bruising and dry patches on face | 1           | 6 weeks  | 3 days after MT  | M            | Craniosacral massage                                           | Not reported              | No major complication (Grade 1)                                  | Vitamin K deficiency bleeding was confirmed after rapid elevation of International correction ratio (INR); the craniosacral massage therapy was the cause of his superficial bleeding                                                                             |
|                                | Li, Z. (2015), China                | Vomiting (repeated)                                                  | Bruising                         | 1           | 5 years  | NS               | M            | Traditional Chinese massage therapy (Ba sha)                   | Grandmother/mother        | Bruising was mild (Grade 1); (patient died due to strangulation) | An incidental case with multiple bruises over the chest, neck, and shoulders resulting from traditional Chinese MT (ba sha), involving pinching the skin between thumb and index finger, for vomiting. Injuries resulting from ba sha were not the cause of death |

**Footnote:** AE: adverse event; CCT: controlled clinical trial; RCT: randomized controlled trial; MT: massage therapy; NS: not stated; F: female; M: male. \* Aromatic oils included sweet marjoram, frankincense, German camomile, myrrh, benzoin, Litsea cubeba, spike lavender, and red thyme.

## DISCUSSION

To the best of our knowledge, this is the first systematic review to primarily assess AEs associated with pediatric MT.

Of serious AE identified, abdominal massage to stimulate peristalsis in preterm infants has been associated with multiple reports of volvulus without malrotation. No AE were identified in association with registered or licensed MT; in trained hands, pediatric MT appears to be safe.

Volvulus without malrotation (VWM) is considered a rare event (35, 36). In an epidemiological survey in Germany, found 26 cases of VWM were identified in very low birth weight infants (VLBW) estimating a rate of 1.08 to 1.5/1000 VLBW (53). We identified 17 events of volvulus without malrotation in preterm infants on this review, mostly VLBW. In 5 VWM, the authors did not consider MT as a risk factor for the volvulus, while for the remaining 12 events, MT was considered a risk factor by authors (35). The identified cases of VWM led to a routine change in their centers to avoid abdominal massage in preterm infants due to the risk of volvulus. All the authors report that changing their practice to avoid abdominal massage in preterm neonates generated no further events of VWM in their centers (35). Volvulus without malrotation is a rare condition, but seems to be associated with preterm birth (<30 weeks GA) and low birth weight (<1000 g) (36, 38, 54-56). The large majority of the events reported in this review occurred in infants born at <30 weeks GA and weighted <1000g, which may be a confounder, since VLBW is considered a risk factor for VWM.

MT appears to be a common non-standardized practice in many NICUs and it remains unclear whether or not it can cause an uncommon condition such as VWM.

Others have reported findings of VWM in preterm infants. Horsch has reviewed cases of volvulus in surgical referral centers over 8 years in Germany and found 3 preterm infants with VWM, of these, 1 received properistaltic abdominal massage (57). Yarkin after reviewing 2 years of data from an epidemiological survey identified that 12 of 15 cases of low birth weight (<1500g) preterm infants with VWM had abdominal



1 massages prior to the event, although due the uncontrolled study design they were unable to determine  
2 abdominal massage as a direct risk factor (58). Horsch and Yarkin were not included in this review because  
3 they did not look into MT specifically.  
4

5  
6 Several authors (35, 57, 59, 60) have speculated on other risk factors for VWM, including immaturity of the  
7 intestine resulting in prolonged transit times and stool retention, use of continuous positive airway pressure  
8 (CPAP) or other intensive respiratory support, and female gender. Several of these risk factors were also  
9 identified in the included reports and it makes difficult to assure causality of MT in the development of VWM,  
10 suggesting caution in the use of abdominal MT in preterm infants until further investigation can be performed.  
11  
12

### 13 **Strengths and limitations**

14 This review was inclusive in searching peer-reviewed publications in seven databases from inception onwards,  
15 and did not limit by language. We minimized subjective errors by independent duplicate screening, study  
16 selection, and data extraction. This SR meticulously collected data from included studies and classified  
17 severities of AEs according to well-established criteria.  
18  
19

20 We have incorporated to this reviews all relevant studies, including case reports, case series, and clinical trials  
21 in an effort to be comprehensive. In addition, we reported studies that reported if AEs occurred or not, whether  
22 they mentioned if AEs were assessed or not, except for case reports which were only included if an event was  
23 reported.  
24  
25

26 As any study, this review has limitations. The majority of the AEs, including 4 out of 5 severe AE, were  
27 described in case series/reports. Although case studies are well-recognized sources of reports on severe,  
28 unusual, and/or rare AEs, conclusions drawn from such sources are limited and do not necessarily warrant  
29 increased perception of risk unless supported by controlled studies. Additionally, given the limited information  
30 and heterogeneity of the data reported in the included studies, it was not possible to identify any conclusive  
31 association between MT and specific AEs, except for *ba sha* massage which caused a characteristic bruising  
32  
33  
34  
35  
36  
37  
38  
39  
40  
41  
42  
43  
44  
45  
46  
47  
48  
49  
50  
51  
52  
53  
54

1 pattern in one case report (51). Lastly, we found that much of the data was inadequately collected and/or  
2 reported, contributing to difficulties in accurately assessing risk. These include lack of detailed information  
3 about MT provider training/qualifications and details about MT treatments and management of AEs. It is  
4 important to highlight that none of the studies reported AEs associated with MT provided by a licensed or  
5 registered massage therapist, although only one study reported the therapist training and qualifications.  
6  
7  
8  
9

## 11 **CONCLUSIONS**

12 We were able to identify a range of AEs associated with MT use, from mild to severe. No AE were reported  
13 when MT was provided by a registered massage therapist. Further research is needed to determine if the  
14 association of abdominal massage with volvulus without malrotation in preterm infants is causal.  
15  
16  
17  
18  
19

## 21 **Acknowledgements**

22 We thank Susanne King-Jones for searching databases, library support and reviewing the manuscript; Katherine  
23 Smith, Sheena Sikora, Kerri Gladwin, Maleka Ramji, and Namrata Hansraj for screening; Samaneh Khanpour  
24 Ardestani, Susanne King-Jones, Tatiana Kryuchkova, Natalia Liapounova, Melissa Morelli-Lacroix, Derek  
25 Wang, Amy Wolgemuth, Hai Chuan Yu, and Liliane Zorzela for translation of non-English papers. We thank  
26 Denise Adams for her contributions to the early development of this work.  
27  
28  
29  
30  
31  
32  
33  
34  
35  
36  
37

38 Figure 1. Prisma flow diagram  
39  
40  
41  
42  
43  
44  
45  
46  
47  
48  
49  
50  
51  
52  
53  
54  
55  
56  
57  
58  
59  
60

## References:

1. National Institutes of Health. Exploring the Science of Complementary and Integrative Health. National Center for Complementary and Integrative Health 2016 Strategic Plan [Internet]. 2016.
2. Health Canada. Complementary and Alternative Health Care: The Other Mainstream? Health Policy Research Bulletin [Internet]. 2003; (7):[1-48 pp.]. Available from: <http://www.hc-sc.gc.ca/sr-sr/pubs/hpr-rpms/bull/2003-7-complement/index-eng.php>.
3. The College of Massage Therapists of Ontario. About Massage Therapy 2019 [July 2019]. Available from: <https://www.cmto.com/about-the-profession/about-massage-therapy/>.
4. The College of Massage Therapists of Ontario. About Massage Therapists in Ontario 2019 [July 2019]. Available from: <https://www.cmto.com/about-the-profession/>.
5. National Institutes of Health. Massage Therapy: An Introduction. National Center for Complementary and Integrative Health 2016 Strategic Plan [Internet]. 2016. Available from: <https://nccih.nih.gov/health/massage/massageintroduction.htm>.
6. National Institutes of Health. rMassage Therapy for Health Purposes. National Center for Complementary and Integrative Health 2016 Strategic Plan [Internet]. 2016. Available from: <https://nccih.nih.gov/health/massage/massageintroduction.htm>.
7. Sagar S, Dryden T, Wong RK. Massage therapy for cancer patients: a reciprocal relationship between body and mind. *Current oncology*. 2007;14(2).
8. Ernst E. The safety of massage therapy. *Rheumatology*. 2003;42(9):1101-6.
9. National Institutes of Health. The use of Complementary and Alternative Medicine in the United States. National Center for Complementary and Integrative Health 2016 Strategic Plan [Internet]. 2007. Available from: [https://nccih.nih.gov/research/statistics/2007/camsurvey\\_fs1.htm](https://nccih.nih.gov/research/statistics/2007/camsurvey_fs1.htm).
10. Adams D, Dagenais S, Clifford T, Baydala L, King WJ, Hervas-Malo M, et al. Complementary and alternative medicine use by pediatric specialty outpatients. *Pediatrics*. 2013;131(2):225-32.
11. Revuelta-Iniesta R, Wilson ML, White K, Stewart L, McKenzie JM, Wilson DC. Complementary and alternative medicine usage in Scottish children and adolescents during cancer treatment. *Complementary therapies in clinical practice*. 2014;20(4):197-202.
12. Adams D, Schiffgen M, Kundu A, Dagenais S, Clifford T, Baydala L, et al. Patterns of utilization of complementary and alternative medicine in 2 pediatric gastroenterology clinics. *J Pediatr Gastroenterol Nutr*. 2014;59(3):334-9.
13. Galicia-Connolly E, Adams D, Bateman J, Dagenais S, Clifford T, Baydala L, et al. CAM use in pediatric neurology: an exploration of concurrent use with conventional medicine. *PLoS One*. 2014;9(4):e94078.
14. Richmond E, Adams D, Dagenais S, Clifford T, Baydala L, King WJ, et al. Complementary and alternative medicine: A survey of its use in children with chronic respiratory illness. *Can J Respir Ther*. 2014;50(1):27-32.
15. Field T. Pediatric Massage Therapy Research: A Narrative Review. *Children*. 2019;6(6):78.
16. Guan L, Collet JP, Yuskiv N, Skippen P, Brant R, Kissoon N. The effect of massage therapy on autonomic activity in critically ill children. *Evidence-based complementary and alternative medicine : eCAM*. 2014;2014:656750.
17. Nelson NL. Massage therapy: understanding the mechanisms of action on blood pressure. A scoping review. *Journal of the American Society of Hypertension : JASH*. 2015;9(10):785-93.
18. Field TM. Massage therapy effects. *American Psychologist*. 1998;53(12):1270-81.
19. Bennett C, Underdown A, Barlow J. Massage for promoting mental and physical health in typically developing infants under the age of six months. *The Cochrane database of systematic reviews*. 2013;4:CD005038.
20. Field T, Diego M, Hernandez-Reif M. Preterm Infant Massage Therapy Research: A Review. *Infant behavior & development*. 2010;33(2):115-24.
21. Beider S, Moyer CA. Randomized Controlled Trials of Pediatric Massage: A Review. *Evidence-based Complementary and Alternative Medicine*. 2007;4(1):23-34.
22. Shin ES, Seo KH, Lee SH, Jang JE, Jung YM, Kim MJ, et al. Massage with or without aromatherapy for symptom relief in people with cancer. *Cochrane Database Syst Rev*. 2016(6):Cd009873.

23. Tsao JCI, Zeltzer LK. Complementary and Alternative Medicine Approaches for Pediatric Pain: A Review of the State-of-the-science. *Evidence-based Complementary and Alternative Medicine*. 2005;2(2):149-59.
24. Centre for Reviews and Dissemination. *Systematic reviews: CRD's guidance for undertaking reviews in health care*: University of York UK.; 2009.
25. Ernst E. Serious adverse effects of unconventional therapies for children and adolescents: a systematic review of recent evidence. *European Journal of Pediatrics*. 2003;162(2):72-80.
26. Ernst E, Barnes J. Methodological approaches to investigating the safety of complementary medicine. *Complementary Therapies in Medicine*. 1998;6(3):115-21.
27. Chou R, Aronson N, Atkins D, Ismaila AS, Santaguida P, Smith DH, et al. AHRQ series paper 4: assessing harms when comparing medical interventions: AHRQ and the effective health-care program. *J Clin Epidemiol*. 2010;63(5):502-12.
28. Zorzela L, Loke YK, Ioannidis JP, Golder S, Santaguida P, Altman DG, et al. PRISMA harms checklist: improving harms reporting in systematic reviews. *BMJ*. 2016;352:i157.
29. Moher D, Liberati A, Tetzlaff J, Altman DG, Group P. Preferred reporting items for systematic reviews and meta-analyses: the PRISMA statement. *International journal of surgery (London, England)*. 2010;8(5):336-41.
30. Golder S, Loke YK. Search strategies to identify information on adverse effects: a systematic review. *Journal of the Medical Library Association*. 2009;97(2):84.
31. CTCAE. *Common Terminology Criteria for Adverse Events; Version 4*. US Department of Health and Human Services, National Institute of Health, National Cancer Institute; 2010.
32. Zorzela L, Mior S, Boon H, Gross A, Yager J, Carter R, et al. Tool to assess causality of direct and indirect adverse events associated with therapeutic interventions. *Current medical research and opinion*. 2018;34(3):407-14.
33. Cullen LA, Barlow JH, Cushway D. Positive touch, the implications for parents and their children with autism: an exploratory study. *Complementary therapies in clinical practice*. 2005;11(3):182-9.
34. Razafimahandry HJC, Rakoto-Ratsimba HN, Rakotoarisoa B, Rakotozafy G. Special features of humeral osteomyelitis in four children in Madagascar France: *Institut de Medecine Tropicale*; 2007 [cited 67 3]. 275].
35. Maas C, Hammer S, Kirschner HJ, Yarkin Y, Poets CF, Franz AR. Late-onset volvulus without malrotation in extremely preterm infants--a case-control-study. *BMC Pediatrics*. 2014;14:287.
36. Zweifel N, Meuli M, Subotic U, Moehrlen U, Mazzone L, Arlettaz R. Manufactured volvulus. *Eur J Pediatr Surg*. 2013;23(3):234-7.
37. Paraskevopoulos E. AR. Volvulus in two preterm infants: abdominal massage as a risk factor? *Swiss Society of Neonatology*. 2006:1-10.
38. Billiemaz K, Varlet F, Patural H, Rayet I, Tardieu D, Lavocat MP, et al. Intestinal volvulus in extremely premature infants. *Archives de pediatrie : organe officiel de la Societe francaise de pediatrie*. 2001;8(11):1181-4.
39. Guilbert J, Flamant C, Hallalel F, Doummar D, Frata A, Renolleau S. Anti-flatulence treatment and status epilepticus: a case of camphor intoxication. *Emergency Medicine Journal*. 2007;24(12):859.
40. Rudnicki J, Boberski M, Butrymowicz E, Niedbalski P, Ogniewski P, Niedbalski M, et al. Recording of amplitude-integrated electroencephalography, oxygen saturation, pulse rate, and cerebral blood flow during massage of premature infants. *Am J Perinatol*. 2012;29(7):561-6.
41. Masoodi T, Mufti GN, Bhat JI, Lone R, Arshi S, Ahmad SK. Neonatal mastitis: a clinico-microbiological study. *Journal of Neonatal Surgery*. 2014;3(1):2.
42. Patel Gera M, Haynes A. Case 6: Bruising and Bleeding in a 6-week-old Boy. *Pediatrics in review*. 2017;38(3):144.
43. Kalinga MJ, Lo NN, Tan SK. Popliteal artery pseudoaneurysm caused by an osteochondroma--a traditional medicine massage sequelae. *Singapore Med J*. 1996;37(4):443-5.
44. Medvedev EA. Case of acute unilateral neurosensory hearing loss caused by massage of the trapezius muscle. *Vestn Otorinolaringol*. 1994(3):38-9.
45. Ram SP, Kyaw K, Noor AR. Haematoma testes due to traditional massage in a neonate. *Trop Doct*. 1994;24(2):81-2.
46. Solanki K, Matnani M, Kale M, Joshi K, Bavdekar A, Bhave S, et al. Transcutaneous absorption of topically massaged oil in neonates. *Indian pediatrics*. 2005;42(10):998.
47. Sankaranarayanan K, Mondkar JA, Chauhan MM, Mascarenhas BM, Mainkar AR, Salvi RY. Oil massage in

- neonates: an open randomized controlled study of coconut versus mineral oil. *Indian pediatrics*. 2005;42(9):877.
48. Huang FY, Huang LM. Effect of local massage on vaccination: DTP and DTPa. *Acta Paediatrica Taiwanica*. 1999;40(3):166.
49. Hsu CY, Huang LM, Lee CY, Lin TY, Lee PI, Chen JM. Local massage after vaccination enhances the immunogenicity of diphtheria-tetanus-pertussis vaccine. *Pediatr Infect Dis J*. 1995;14(7):567-72.
50. Beaver PK. Premature infants' response to touch and pain: can nurses make a difference? *Neonatal Netw*. 1987;6(3):13-7.
51. Li Z, Huan Z, Byard RW. Bruising caused by traditional Chinese massage therapy (ba sha) complicating the assessment of a case of fatal child abuse. *Journal of Forensic and Legal Medicine*. 2015;36:49.
52. Goncharov OV. Massage with aromatic oils in complex rehabilitation of children with aftereffects of perinatal hypoxic lesions of the central nervous system Russian Federation2007 [2]. 18]. Available from: <http://ovidsp.ovid.com/ovidweb.cgi?T=JS&PAGE=reference&D=emed8&NEWS=N&AN=17566172>.
53. Yarkin Y, Maas C, Franz AR, Kirschner HJ, Poets CF. Epidemiological study on intestinal volvulus without malrotation in VLBW infants. *Archives of disease in childhood Fetal and neonatal edition*. 2019;104(4):F415-f8.
54. Mark S, Schlößer R, Gfroerer S, Rolle U, Böckelmann S, Weltzien A, et al. Verfall des Allgemeinzustands eines Frühgeborenen. *Monatsschrift Kinderheilkunde*. 2013;161(4):296-8.
55. Raherison R, Grosos C, Lemale J, Blondiaux E, Sabourdin N, Dahan S, et al. [Prenatal intestinal volvulus: A life-threatening event with good long-term outcome]. *Archives de pediatrie : organe officiel de la Societe francaise de pediatrie*. 2012;19(4):361-7.
56. Drewett M, Burge DM. Late-onset volvulus without malrotation in preterm infants. *J Pediatr Surg*. 2009;44(2):358-61.
57. Horsch S, Albayrak B, Trobs RB, Roll C. Volvulus in term and preterm infants - clinical presentation and outcome. *Acta Paediatr*. 2016;105(6):623-7.
58. Yarkin Y, Maas C, Franz AR, Kirschner HJ, Poets CF. Epidemiological study on intestinal volvulus without malrotation in VLBW infants. *Archives of disease in childhood Fetal and neonatal edition*. 2018.
59. Berseth CL. Gestational evolution of small intestine motility in preterm and term infants. *The Journal of Pediatrics*. 1989;115(4):646-51.
60. Kargl S, Wagner O, Pumberger W. Volvulus without malposition—a single-center experience. *Journal of Surgical Research*. 2015;193(1):295-9.

## Appendix A: search strategy

1  
2  
3  
4  
5  
6  
7  
8  
9  
10  
11  
12  
13  
14  
15  
16  
17  
18  
19  
20  
21  
22  
23  
24  
25  
26  
27  
28  
29  
30  
31  
32  
33  
34  
35  
36  
37  
38  
39  
40  
41  
42  
43  
44  
45  
46  
47  
48  
49  
50  
51  
52  
53  
54  
55  
56  
57  
58  
59  
60

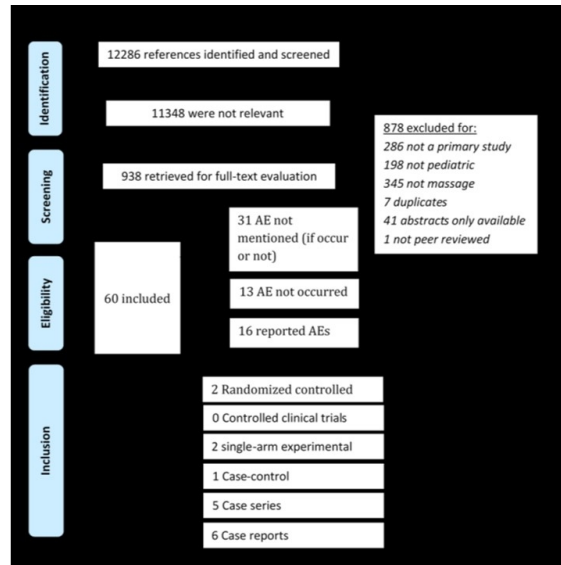

338x190mm (96 x 96 DPI)

# BMJ Paediatrics Open

## Adverse events associated with pediatric massage therapy: a systematic review

|                               |                                                                                                                                                                                                                                                                |
|-------------------------------|----------------------------------------------------------------------------------------------------------------------------------------------------------------------------------------------------------------------------------------------------------------|
| Journal:                      | <i>BMJ Paediatrics Open</i>                                                                                                                                                                                                                                    |
| Manuscript ID                 | bmjpo-2019-000584.R1                                                                                                                                                                                                                                           |
| Article Type:                 | Review                                                                                                                                                                                                                                                         |
| Date Submitted by the Author: | 25-Feb-2020                                                                                                                                                                                                                                                    |
| Complete List of Authors:     | Karkhaneh, Mohamad; University of Alberta<br>Zorzela, Liliane; University of Alberta, Pediatrics<br>Jou, Hsing; University of Alberta<br>Funabashi, Martha; University of Alberta<br>Dryden, Trish; Centennial College<br>Vohra, Sunita; University of Alberta |
| Keywords:                     | Musculo-Skeletal                                                                                                                                                                                                                                               |
|                               |                                                                                                                                                                                                                                                                |

SCHOLARONE™  
Manuscripts



I, the Submitting Author has the right to grant and does grant on behalf of all authors of the Work (as defined in the below author licence), an exclusive licence and/or a non-exclusive licence for contributions from authors who are: i) UK Crown employees; ii) where BMJ has agreed a CC-BY licence shall apply, and/or iii) in accordance with the terms applicable for US Federal Government officers or employees acting as part of their official duties; on a worldwide, perpetual, irrevocable, royalty-free basis to BMJ Publishing Group Ltd ("BMJ") its licensees and where the relevant Journal is co-owned by BMJ to the co-owners of the Journal, to publish the Work in this journal and any other BMJ products and to exploit all rights, as set out in our [licence](#).

The Submitting Author accepts and understands that any supply made under these terms is made by BMJ to the Submitting Author unless you are acting as an employee on behalf of your employer or a postgraduate student of an affiliated institution which is paying any applicable article publishing charge ("APC") for Open Access articles. Where the Submitting Author wishes to make the Work available on an Open Access basis (and intends to pay the relevant APC), the terms of reuse of such Open Access shall be governed by a Creative Commons licence – details of these licences and which [Creative Commons](#) licence will apply to this Work are set out in our licence referred to above.

Other than as permitted in any relevant BMJ Author's Self Archiving Policies, I confirm this Work has not been accepted for publication elsewhere, is not being considered for publication elsewhere and does not duplicate material already published. I confirm all authors consent to publication of this Work and authorise the granting of this licence.



**Adverse events associated with pediatric massage therapy: a systematic review**

Karkhaneh M. MD PhD<sup>1</sup>; Zorzela L, MD PhD<sup>2</sup>; Jou H. MD<sup>3</sup>; Funabashi M. PhD<sup>4</sup>; Dryden T. RMT, M.Ed.<sup>5</sup>; Vohra, S. MD MSc<sup>6</sup>

**Affiliations:**

- 1- Research Associate, Department of Medicine, Faculty of Medicine & Dentistry, University of Alberta
- 2- Assistant Clinical Professor, Department of Pediatrics, Faculty of Medicine & Dentistry, University of Alberta
- 3- Associate Professor, Department of Pediatrics, Faculty of Medicine & Dentistry, University of Alberta
- 4- Post Doctoral student at Department of Pediatrics, Faculty of Medicine & Dentistry, University of Alberta
- 5- Associate Vice President, Research and Corporate Planning, Centennial College, Toronto, ON
- 6- Professor, Department of Pediatrics, Medicine, and Psychiatry, Faculty of Medicine & Dentistry, University of Alberta

**Corresponding author:** Sunita Vohra, Dept of Pediatrics, University of Alberta; 1702 College Plaza, 8215 - 112 Street NW; Edmonton, AB; Canada T6G 2C8; Fax: 780-492-5883; email: svohra@ualberta.ca

**Short title:** Adverse events associated with pediatric massage

**Conflict of interest:** The authors have no conflicts of interest relevant to this article to disclose

**Funding source:** this manuscript received no external funding.

**Abbreviations:**

AE – adverse events

EEG - electroencephalography

GA- Gestational age

MT- massage therapy

RCT- randomized controlled trial

VWM-Volvulus without malrotation

**Table of contents summary:**

Massage therapy is frequently used in children. To date, no study has systematically assessed its safety. This review reports safety of massage in children.

What is known:

- Massage therapy has been widely used for many different indications in children and adults.
- Several studies reports its efficacy, but adverse events of massage therapy is poorly investigated.

What this study adds:

- We identified a range of AEs associated with MT use, from mild to severe.
- We identified an association between abdominal MT in preterm neonates and volvulus without malrotation, the causality of this association is yet to be determined, but until further data are identified this should warrant extreme causation on the use of abdominal massage in preterm neonates.

1 **Contribution statement:** Dr Vohra and Dr Jou and Dryden conceptualized and designed the study, reviewed and  
2 critically reviewed the manuscript for important intellectual content.  
3 Drs Karkhaneh and Zorzela and Funabashi designed the data collection instruments, collected data, carried out the initial  
4 analyses, and drafted the manuscript reviewed and revised the manuscript.  
5 All authors approved the final manuscript as submitted and agree to be accountable for all aspects of the work.

6 **All data relevant to the study are included in the article or uploaded as supplementary information.**  
7  
8  
9  
10  
11  
12  
13  
14  
15  
16  
17  
18  
19  
20  
21  
22  
23  
24  
25  
26  
27  
28  
29  
30  
31  
32  
33  
34  
35  
36  
37  
38  
39  
40  
41  
42  
43  
44  
45  
46  
47  
48  
49  
50  
51  
52  
53  
54  
55  
56  
57  
58  
59  
60

**ABSTRACT**

**Introduction:** Massage therapy (MT) is frequently used in children. No study has systematically assessed its safety in children and adolescents. We systematically review adverse events (AEs) associated with pediatric MT.

**Methods:** We searched seven electronic databases from inception to December 2018. We included studies if they: (i) were primary studies published in a peer-reviewed journal, (ii) involved children aged 0-18 years, and (iii) a type of MT was used for any indication. No restriction was applied to language, year of publication, and study design. AEs were classified based on their severity and association to the intervention.

**Results:** Literature searches identified 12,286 citations, of which 938 citations were retrieved for full-text evaluation and 60 studies were included. In the included studies, 31 (51.6%) did not report any information on AEs, 13 (21.6%) reported that no AE occurred, and 16 studies (26.6%) reported at least one AE after MT. There were 20 mild events (grade 1) that resolved with minimal intervention, 26 moderate events (grade 2-3) that required medical intervention, and 18 cases of severe AEs (grade 4-5) that resulted in hospital admission or prolongation of hospital stay; of these, 17 AE were volvulus in premature infants, four of which were ultimately fatal events.

**Conclusion:**

We identified a range of AEs associated with MT use, from mild to severe. Unfortunately, the majority of included studies did not report if an adverse event occurred or not, leading to publication bias. This review reports an association between abdominal massage with volvulus without malrotation in preterm infants, it is still to be defined if this is casual or not, but our findings warrant caution in the use of abdominal massage in preterm infants until further investigation is done in the subject.

## BACKGROUND

Massage therapy (MT) is one of the most popular complementary therapies in North America and has a long history of practice.[1, 2] According to the College of Massage Therapists of Ontario, “Massage therapy consists primarily of hands-on manipulation of the soft tissues of the body, specifically, the muscles, connective tissue, tendons, ligaments and joints for the purpose of optimizing health. Massage therapy treatment has a therapeutic effect on the body and optimizes health and well-being by acting on the muscular, nervous and circulatory systems”.[3]

Massage therapists press, rub and manipulate muscles and soft tissues of the body, often with their hands and fingers, to relieve physical dysfunction and pain, reduce stress, promote relaxation, reduce anxiety or depression, and improve general wellbeing.[4, 5]

Various types of MTs have been practiced using specific techniques, including Swedish, Thai, shiatsu, tui na, connective tissue, deep tissue, myofascial, trigger point, etc.[6-8]

Massage is used in children around the world, including countries where massage is not part of their traditional medicine practices. Close to 1% of American children use MT.[9] In Canada, a survey involving 979 families attending subspecialty clinics, demonstrated that the most common complementary therapy reported was massage, with 39.1% reporting use.[10] In Europe, the frequency of massage use varies from 8.7 to 29% in a subpopulation of children with oncologic disorders.[11] MT is frequently used in children with health problems and its use is as high as 47% in patients with neurologic disorders, 38% in patients with cardiac disorders and 34% in patients with respiratory disorders.[12-14]

Despite MT’s longstanding history and popularity, specific mechanisms by which massage exerts its therapeutic effects are not yet known.[7, 15-17] Researchers have long been interested in MT for children’s health and wellbeing.[18] A recent meta-analysis of clinical trials of MT on infants under six months of age found statistically significant effects on weight and height, improving head/arm/leg circumference, 24-hour sleep duration, lowering blood bilirubin level, and frequency of diarrhea.[19] Among preterm infants, MT enhanced average weight gain and reduced hospital length of stay.

1 [20] In children 2-18 years old, MT has been shown to improve arthritis pain, muscle tone, and decrease anxiety.[21]

2 There is limited evidence supporting MT for cancer pain.[22] and chronic pain in children.[23]

3  
4  
5  
6 Most systematic reviews of pediatric massage therapy have focused on the effectiveness of MT rather than its safety.[18-  
7 21, 24-30] One systematic review included two case reports of AEs among children[8, 31]; one infant with scrotal hematoma  
8 associated with MT of a hydrocele[32] and a teenager with a popliteal artery pseudoaneurysm after MT overlying an  
9 exostosis.[33] AEs reported for adults were more diverse, including: cerebrovascular accidents, disc herniation/spinal cord  
10 injury, thromboembolism (renal, pulmonary), soft tissue trauma, leg ulcer, and genitourinary injuries.[8, 31, 34, 35] These  
11 studies demonstrated that the nature and circumstances of MT AEs for adults are quite different from pediatrics. While  
12 many complementary therapies are considered to be at low risk of harm, safety of health interventions should be measured,  
13 rather than assumed, especially in vulnerable populations, including children.[36, 37]

14  
15  
16  
17  
18  
19  
20  
21  
22  
23 The objective of this systematic review was to identify the evidence of adverse events associated with massage therapy in  
24 children.

## 25 26 27 28 29 30 **METHODS**

### 31 **Searching Databases**

32  
33 A systematic review was conducted according to the guidelines of the Preferred Reporting Items for Systematic Review  
34 (PRISMA) Statement and the PRISMA Harms.[38, 39] In consultation with two massage therapists, a health research  
35 librarian designed a comprehensive search strategy. Seven electronic databases were searched from inception to  
36 December 2018. The databases included: Medline, EMBASE, CINAHL, Cochrane Central Registry of Controlled Trials,  
37 Cochrane Database of Systematic Reviews, PsycINFO, Alt HealthWatch. We identified search terms by using key words  
38 including Massage, Adverse Effects, and Pediatrics and a combination of subject terms selected from the controlled  
39 vocabulary or thesaurus (e.g. MeSH - Medical Subject Headings, Emtree for Embase, CINAHL Headings and PsycINFO  
40 Thesaurus) with a wide range of free-text terms.

41  
42  
43  
44  
45  
46  
47  
48  
49  
50 No language restrictions were applied. The search strategy was adapted to follow recommendations by Golder & Loke to

optimize for the retrieval of adverse effects data.[40] The full Medline search strategy is available in Appendix A.

## Study Selection

Studies were eligible to be included if they:

- 1) were a primary study published in a peer-reviewed journal, primary study was defined as “*study reported directly by the researcher that conducted the study*”, rather than depending on data collected from previously done research.
- 2) involved children from birth to 18 years of age, 3) used MT for any indication, studies were not excluded based on conditions leading to MT. The inclusion of studies was not limited by medical condition, training of massage provider, or the presence/absence of a comparison/control intervention. There was no restriction by study design or reporting AE. We excluded studies if they: 1) only applied light touch or 2) only used self-massage, 3) grey literature. Studies of reflexology and studies of massage for lacrimal duct obstruction were also excluded since those were not relevant to this review. Case reports were only included if they reported an AE. Two reviewers performed study selection, independent and in duplicate, and discrepancies were resolved by consensus or a third reviewer.

## Data Extraction

A structured data extraction form was used to collect data from the articles. General characteristics of studies included country, study design, settings, population, age, and gender. Specific information included: indication for treatment, AE severity, N of event, age, (age/weight and age at AE for newborn babies), gender, type of MT, MT practitioner, outcome with severity grade, and notes from the authors. Independent duplicate assessment was performed for both study selection and data extraction.

Adverse events were defined as per the Cochrane handbook as: ‘adverse event is an unfavorable or harmful outcome that occurs during, or after, the use of a drug or other intervention, but is not necessarily caused by it’.[41]

## Data Synthesis

The data from studies were tabulated into general information and AEs tables. The Common Terminology Criteria for Adverse Events (CTCAE) scale was used to classify severity of AEs.[42] (Table 1)

**Table 1: Grading system for severity of adverse events (CTCAE)\***

| Grading | Description                                                                                                                                                                                                                                                                     |
|---------|---------------------------------------------------------------------------------------------------------------------------------------------------------------------------------------------------------------------------------------------------------------------------------|
| Grade 1 | Mild; asymptomatic or mild symptoms; clinical or diagnostic observations only; intervention not indicated                                                                                                                                                                       |
| Grade 2 | Moderate; minimal, local or non-invasive intervention indicated; limiting age-appropriate instrumental Activities of Daily Living (Instrumental ADL: preparing meals, shopping for groceries or clothes, using the telephone, managing money, etc.)                             |
| Grade 3 | Severe or medically significant but not immediately life-threatening; hospitalization or prolongation of hospitalization indicated; disabling; limiting self-care ADL (bathing, dressing and undressing, feeding self, using the toilet, taking medications, and not bedridden) |
| Grade 4 | Life-threatening consequences; urgent intervention indicated                                                                                                                                                                                                                    |
| Grade 5 | Death related to AE                                                                                                                                                                                                                                                             |

\*CTCAE: Common Terminology Criteria for Adverse Events

The severity was categorized into five *grades*, from *grade 1* (mild, asymptomatic) to *grade 5* (death), based on information provided by the studies. Duplicate assessment of CTCAE ratings were performed and discrepancies between two reviewers were resolved by consulting a senior reviewer.

We also classified the AEs as ‘direct’, if directly caused by the intervention, or ‘indirect’, if the intervention caused a delay in diagnosis or treatment which resulted in an adverse event.[43]

Since this was a systematic review of AEs following MT, effectiveness/efficacy of MT was not assessed. We neither performed meta-analysis nor risk of bias assessment. Subgroup analysis was done separating study designs by severity of adverse events to assess if any specific type of massage would lead to more severe events.

## RESULTS

Comprehensive search in seven electronic databases yielded a total of 12,286 citations. Screening titles and abstracts identified 11,348 references irrelevant to the review question; 938 full text articles were retrieved for further evaluation.

By using the pre-specified inclusion/exclusion criteria, 60 studies were included (Figure 1).

The discrepancies were discussed, and consensus was reached between the two reviewers. There were no residual

discrepancies.

Included studies were published between 1991 and 2018, and were conducted in 11 countries including China (n=1), France (n=2), Germany (n=1), India (n=3), Iran (n=3), Madagascar (n=1), Malaysia (n=1), Poland (n=1), Russia (n=2), Singapore (n=1), Sweden (n=1) Switzerland (n=2), United States (n=1) and United Kingdom (n=2). Among 60 studies with a total population of (n=3557), 29 studies (n=1520) were single arm experimental or case studies that received MT and 31 studies (n=2037) were studies a comparator/control group, of which almost half (n=972) have received MT and the rest (n=1065) were controls with no MT. Gestational age (GA) in the preterm infants having MT varied was from 23.5 to 37 weeks. Age of children ranged from 1 day to 18 years.

#### Studies not reporting on AE

There were 13 studies (10 RCT, 1 CCT, 2 single-arm experiments) that did not report if an AE occurred, or not, after receiving MT. Of total 878, 436 children (0 to 18 years) received MT for various reasons including infantile colic, childhood eczema, weight gain in preterm babies, soothing pain for heel stick, improving neurological diseases, and helping urinary tract and HIV infection.

#### Reports of Adverse Events

Of 60 included studies, 16 (26.6%) reported AE(s), 31 (51.6%) did not mention if an AE occurred or not, and 13 (21.6%) reported that no AE occurred. Figure 1 illustrates the PRISMA flow diagram. Of 16 studies (n=438) reporting AEs, 13 were published in English, one in Russian, and two in French. In total, 11 different types of AEs occurred in 64 individuals. Of 16 studies reporting an AE, five did not state who performed the massage therapy. Of the 11 that reported, MT was provided by trained nurses (n=2), parents/grandparents (n=1), paramedic personnel (n=1), nanny (n=1), traditional massage practitioner (n=1), and trained massage practitioner (n=5). In some cases, a nurse or trained massage practitioner started MT, and a parent continued the massage. None of the studies reported any AE associated with MT when it was provided by a licensed or registered massage therapist.



## Indirect Adverse Event

One publication identified an indirect AE, i.e., a delay in diagnosis and/or treatment. A case report documented four children with *Staphylococcus aureus* osteomyelitis, which presented as upper arm swelling.[44] The authors considered the use traditional MT for swelling a cause for delay in the diagnosis and treatment, leading to progression of the infection (Grade 3).

## Risk of Bias Assessment

Risk of bias was not assessed for two reasons: (i) the large majority of included studies (11 of 16) were case reports and case series, for which there is no universally accepted tool to assess bias; and (ii) with regards to RCTs, there is evidence that existing ROB tools are developed with efficacy as their main focus and that other factors should be considered for assessment of adverse events.[41] Until an appropriate tool is developed, we opt to not proceed with an assessment that may itself lead to bias. At present, there is no clear guidance on how to proceed with ROB assessment on studies reporting adverse events data.[37, 41, 45-48]

## Studies not reporting on AE

There were 13 studies (10 RCT, 1 CCT, 2 single-arm experiments) not reporting if an AE occurred, or not, after receiving MT. Of total 878, 436 children (0 to 18 years) received MT for various reasons including infantile colic, childhood eczema, weight gain in preterm babies, soothing pain for heel stick, improving neurological diseases, urinary tract infection and HIV infection.

## Adverse Events and severity

### Serious AE (Grades 4-5)

Five included studies reported 18 cases of serious AEs after MT.[49-53]

Seventeen preterm infants (15 females and two males) were diagnosed with intestinal volvulus without malrotation after abdominal massage. The MT were usually performed 4-8 times per day by nurses to stimulate peristalsis in preterm (27-31-week gestational age), and extremely preterm (>23.5 and <27 weeks gestational age) infants. The intestinal volvulus

1 occurred from 13 days to 52 days after birth. Four infants died (Grade 5) and 13 survived after bowel resection surgery  
2 (Grade 4). A retrospective case control study done by Maas,[49] reports five extremely preterm infants (GA 24.4 weeks)  
3 with volvulus without malrotation. Each case was matched with five other preterm infants with similar birth weight, GA  
4 and birth year. Three of the five patients with volvulus died. Maas reports that MT was not found to be risk factor for the  
5 and birth year. Three of the five patients with volvulus died. Maas reports that MT was not found to be risk factor for the  
6  
7  
8  
9  
10

11 In addition, a serious AE also occurred in a 4-month old female who had status epilepticus due to camphor intoxication,  
12 following abdominal massage with camphor-containing lotion. She was hospitalized for 72 hours for uncontrolled  
13 seizures, where she was intubated, mechanically ventilated, and given seizure treatment (Grade 4) (Table 2).  
14  
15  
16  
17  
18  
19  
20  
21  
22  
23  
24  
25  
26  
27  
28  
29  
30  
31  
32  
33  
34  
35  
36  
37  
38  
39  
40  
41  
42  
43  
44  
45  
46  
47  
48  
49  
50  
51  
52  
53  
54  
55  
56  
57  
58  
59  
60

**Table 2: Volvulus without malrotation in pediatric massage therapy (n=17)**

| First author (Year), location Study design                   | Indication for treatment                              | AE Severity | n event /N population | Age/weight                        | Age at AE                                                | Gender     | Type of MT                                      | MT practitioner      | Outcome (Grade)                                        | Notes from study authors                                                                                                                                  |
|--------------------------------------------------------------|-------------------------------------------------------|-------------|-----------------------|-----------------------------------|----------------------------------------------------------|------------|-------------------------------------------------|----------------------|--------------------------------------------------------|-----------------------------------------------------------------------------------------------------------------------------------------------------------|
| Maas, C. (2014), Germany<br>Case-control                     | To stimulate peristalsis in extremely preterm infants | VWM Severe  | 5/2                   | 23.6-25.4 weeks GA; 370-630 grams | 37-52 d after birth                                      | 5 F        | Abdominal massage 4-6 times/day                 | NS                   | 3 Died (Grade 5)<br>2 Survived after surgery (Grade 4) | Data did not support the hypothesis that abdominal massage was a risk factor for VWM; no further cases were diagnosed after the practice was discontinued |
| Zweifel, N. et al. (2013), Switzerland<br>Case series        | To stimulate peristalsis in preterm infants           | VWM Severe  | 3/3                   | 27-31 weeks GA; 880 grams         | NS                                                       | 2 F<br>1 M | Repeated abdominal massage multiple times a day | Nurse                | 3 survived after surgery (Grade 4)                     | There may be a causal relationship between abdominal massage and VWM; no further cases were diagnosed after the practice was discontinued                 |
| Paraskevopoulos E. et al. (2006), Switzerland<br>Case series | To stimulate peristalsis                              | VWM Severe  | 2/2                   | 27 weeks GA                       | At 19 <sup>th</sup> and 32 <sup>nd</sup> day after birth | 2 F        | Intensive abdominal massage every 3 hours       | Nurse                | 2 survived after surgery (Grade 4)                     | The infants had no other risk factors other than the abdominal massage; the practice was discontinued with no further cases since                         |
| Billimaz, K. (2001), France<br>Case series                   | To stimulate peristalsis                              | VWM Severe  | 7/7                   | 27-29 weeks GA: 660-1100 grams    | Day 13-33                                                | 6 F<br>1 M | Abdominal massage                               | Health care provider | 1 died (Grade 5)<br>6 survived after surgery (Grade 4) | No new cases of VWM were seen after the practice was discontinued                                                                                         |

Footnote: AE: adverse event; MT: massage therapy; VWM: volvulus without malrotation; GA: gestational age; wk: week; NS: not stated; F: female; M: male.

**Moderate AEs (Grade 2-3)**

There was one non-randomized controlled trial (NRCT),[54] two case series[44, 55] and four case reports[32, 33, 56, 57] from 1994 to 2017 reporting on 27 children, aged from 1-day to 16 years old. Those children experienced moderate AEs including infant mastitis/abscess, osteomyelitis, popliteal artery pseudo-aneurysm, acute unilateral neurosensory hearing loss, scrotal hematoma, and oxygen desaturation. The NRCT[54] assessed physiological measurements including amplitude-integrated electroencephalography (aEEG), oxygen saturation (SaO<sub>2</sub>), pulse rate, and cerebral blood flow in 39 preterm infants following whole body Shantol (stroking and rubbing whole body) massage by a therapist and the mother. They reported four cases of oxygen desaturation (<85%) requiring withdrawal from the experiment (Grade 2); no further details were provided. One case series[55] described 15 cases of neonatal mastitis following repeated massage in 15 infants aged 6-48 days; all cases needed antibiotic therapy with or without abscess drainage (Grade 3). Three case reports of MT AE were also published: (i) a popliteal artery pseudo aneurysm after leg MT on an osteochondroma in a 16-year old male;[33] (ii) acute unilateral neurosensory hearing loss after MT on the neck and trapezius muscle in a 14-year old male diagnosed with autonomic nervous system dysfunction;[57] and (iii) scrotal hematoma after traditional MT with a warm sand bag on hydrocele of a 1-day old baby boy.[32] The first and third cases resolved after hospitalization and appropriate surgery and second case resolved after intensive treatment plan at a hospital for 15 days and at home for seven days (Grade 3) (Table 3).

**Table 3: Moderate to Severe adverse events in pediatric massage therapy (n=27)**

| First author (Year), location Study design          | Indication for treatment                                    | AE Severity                                                        | n event/N population                                           | Age                                                     | Time of AE                     | Gender     | Type of MT                                       | MT practitioner                           | Outcome (Grade)                                                                                         | Notes from study authors                                                                                                                                                                                                                       |
|-----------------------------------------------------|-------------------------------------------------------------|--------------------------------------------------------------------|----------------------------------------------------------------|---------------------------------------------------------|--------------------------------|------------|--------------------------------------------------|-------------------------------------------|---------------------------------------------------------------------------------------------------------|------------------------------------------------------------------------------------------------------------------------------------------------------------------------------------------------------------------------------------------------|
| Rudnicki, J. (2012), Poland CCT                     | Assessing the physiologic effects* of MT in preterm infants | Arterial oxygen desaturation <85%<br>Moderate                      | 4/39                                                           | 39 preterm infants, 22 <32 weeks GA and 17 ≥32 weeks GA | 18 days (n=17), 24 days (n=22) | 5 F        | Shantal (stroking and rubbing whole body)        | Therapist/ mother                         | Withdrawn from the study (Grade 2)                                                                      | No other information was given by the authors about management or resolution of this AE                                                                                                                                                        |
| Masoodi, T. (2014), India Case series               | Breast hypertrophy (12 mastitis and 20 abscess)             | Mastitis and breast abscesses<br>Moderate                          | 15/32 received MT to express secretions for breast hypertrophy | 6-48 days                                               | NS                             | NS         | Repeated breast massage                          | NS                                        | Resolved after antibiotic therapy/drainage of abscess (Grade 3)                                         | Massage for neonatal breast hypertrophy should not be performed                                                                                                                                                                                |
| Razafimahandry, H.J. (2007), Madagascar Case series | Upper arms osteomyelitis (Staphylococcus aureus)            | Severe infection due to delayed diagnosis (20-60 days)<br>Moderate | 4/4                                                            | 5-11 years                                              | NS                             | 2 F<br>2 M | Traditional massage                              | NS                                        | 3 cases resolved after hospitalization and antibiotic therapy (Grade 3)                                 | One case was a severely cachectic 11-year old boy diagnosed with pulmonary tuberculosis and died of septic shock five days later; no other details regarding his death was described                                                           |
| Guilbert J. et al. (2007), France Case series       | Flatulence                                                  | Status epilepticus<br>Severe                                       | 1/1                                                            | 4 months                                                | 72 hours                       | 1 F        | Abdominal massage with camphor-containing lotion | Caregiver                                 | Hospitalized, intubated, treated for status epilepticus (Grade 4)                                       | Other investigations were normal; the infant was extubated after three days and later discharged home with a normal neurological examination                                                                                                   |
| Kalinga, M.J. (1996), Singapore Case report         | Swelling of right thigh due to osteochondroma               | Popliteal artery pseudo-aneurysm<br>Moderate                       | 1/1                                                            | 16 years                                                | 3rd session of massage         | M          | MT with herbal medicine (5 sessions)             | Traditional Chinese Medicine practitioner | Resolved after hospitalization and surgery (Grade 3)                                                    | Diagnosis was right popliteal artery pseudo-aneurysm after the 5 <sup>th</sup> session of MT. At surgery femoral artery defect was found adjacent to the osteochondroma                                                                        |
| Medvedev, E. (1994), Russia Case report             | Autonomic nervous system dysfunction                        | Acute unilateral neurosensory hearing loss<br>Moderate             | 1/1                                                            | 14 years                                                | During treatment               | M          | Tonic MT of the neck including trapezius muscle  | NS                                        | Recovered with hospitalization; medications plus "5 sessions of TENS** for 8th cranial nerve" (Grade 3) | The boy with ANS dysfunction received MT and developed acute unilateral neurosensory hearing loss with noise. MT stimulated the ANS and caused vascular spasm leading to decreased blood flow to the cochlea and subsequent hearing impairment |
| Ram, S.P. (1994), Malaysia Case report              | Hydrocele                                                   | Scrotal hematoma<br>Moderate                                       | 1/1                                                            | 1 day                                                   | 1st day                        | M          | Traditional MT to testes with warm sand bag      | NS                                        | Resolved after surgery (Grade 3)                                                                        | None                                                                                                                                                                                                                                           |

---

Footnote: AE: adverse event; MT: massage therapy; CCT: controlled clinical trial (non-randomized controlled trial); GA: gestational age; NS: not stated; F: female; M: male; TENS: transcutaneous electrical nerve stimulation; ANS: autonomic nervous system.

---

1  
2  
3  
4  
5  
6  
7  
8  
9  
10  
11  
12  
13  
14  
15  
16  
17  
18  
19  
20  
21  
22  
23  
24  
25  
26  
27  
28  
29  
30  
31  
32  
33  
34  
35  
36  
37  
38  
39  
40  
41  
42  
43  
44  
45  
46  
47

**Mild AE (Grade 1)**

Two RCTs[58, 59] described skin rashes after whole body massage with various oils (almond, mineral, coconut, or safflower) examining the effects of MT on growth measurements (weight, height, etc.) in 17 infants with age from 1-day to 3-days old. These mild reactions occurred in 2.5% in the first[58] and 6% in the second[59] study populations; all resolved spontaneously without discontinuation of MT or the oils (Grade 1). Two almost identical RCTs[60, 61] examined the immunogenicity of mild rubbing massage on vaccination sites among 808 and 328 infants 2-6 months old, respectively. AEs included crying, anorexia, drowsiness, vomiting, irritability, fever, pain, redness, and induration; all were mild and did not need an intervention except general health advice for vaccinated children (Grade 1). Two single-arm experimental studies, one by Cullen et al.,[62] described mild hyperactivity (n=1) and the other by Beaver et al.,[63] reported increased blood pressure/heart rate and decreased transcutaneous oxygen saturation (n=8) following MT. One case report by Li et al.,[64] described a mild skin bruising after a MT technique involving pinching skin. All these interventions needed minimal intervention for resolution (Grade 1) (Table 4).

**Unclassified AEs**

Due to insufficient information, we were unable to properly assess and rate the severity of AE reported by a NRCT. Goncharov et al.,[65] assessed the effect of MT with a mixture of aromatic oils on CNS rehabilitation among 31 infants aged 4-18 months with perinatal hypoxic central nervous system (CNS) injury. One child (age and sex not provided) developed an “allergic reaction” (oil product not specified) and dropped out of the study (no further details were provided to allow for severity rating). The manuscript was written in Russian and author’s contact information was not available.

**Table 4: Mild adverse events in pediatric massage therapy (n=20)**

| First author (Year), location Design          | Indication for treatment                                             | AE Severity                           | n event /N population | Age      | Time of AE       | Gender    | Type of MT                                                     | MT practitioner           | Outcome (Grade)                                                  | Notes from study authors                                                                                                                                                                                                                                          |
|-----------------------------------------------|----------------------------------------------------------------------|---------------------------------------|-----------------------|----------|------------------|-----------|----------------------------------------------------------------|---------------------------|------------------------------------------------------------------|-------------------------------------------------------------------------------------------------------------------------------------------------------------------------------------------------------------------------------------------------------------------|
| Patel, GM (2017), USA Case-report             | Examining of MT for reflux                                           | Bruising and dry patches on face Mild | 1/1                   | 6 weeks  | 3 days after MT  | M         | Craniosacral massage                                           | Not reported              | No major complication (Grade 1)                                  | Vitamin K deficiency bleeding was confirmed after rapid elevation of International correction ratio (INR); the craniosacral massage therapy was the cause of his superficial bleeding                                                                             |
| Li, Z. (2015), China Case-report              | Repeated vomiting                                                    | Bruising Mild                         | 1/1                   | 5 years  | NS               | M         | Traditional Chinese massage therapy (Ba sha)                   | Grandmother/mother        | Bruising was mild (Grade 1); (patient died due to strangulation) | An incidental case with multiple bruises over the chest, neck, and shoulders resulting from traditional Chinese MT (ba sha), involving pinching the skin between thumb and index finger, for vomiting. Injuries resulting from ba sha were not the cause of death |
| Solanki, K. (2005), India RCT                 | Examining MT with oil on growth and fatty acid profile of the infant | skin rash Mild                        | 3/118                 | 1-3 days | 3rd and 4th days | 47 F 71 M | Massage with safflower oil for 10 min, 4 times/day over 5 days | Trained massager          | Resolved spontaneously (Grade 1)                                 | The rash resolved without treatment in 1-2 days despite continuing the oil massage                                                                                                                                                                                |
| Sankaranarayanan, K. (2005), India RCT        | Examining MT with oil on weight and growth and AE                    | skin rash Mild                        | 14/22 4               | 2 days   | NS               | NS        | Massage 5 minutes 4/day with coconut/mineral oil or no oil     | Trained person and mother | Resolved spontaneously (Grade 1)                                 | Massage in hospital and home continued for 30 days; mild rash occurred equally in all groups, coconut oil (n=5), mineral oil (n=5), and placebo (n=4), and did not require discontinuation of massage                                                             |
| Cullen, L.A. (2005), UK Single-arm experiment | Examining MT on communication of autistic child                      | Worsened hyperactivity Mild           | 1/15                  | NS       | After 24 hours   | M         | 1-hour weekly MT for 8 times by massager and daily by parent   | Therapist and parents     | No major complication (Grade 1)                                  | Eight other participants (2-13 years old, all with autism) who completed the study over eight weeks reported “no obvious negatives”                                                                                                                               |

Footnote: AE: adverse event; RCT: randomized controlled trial; MT: massage therapy; NS: not stated; F: female; M: male.



## DISCUSSION

To the best of our knowledge, this is the first systematic review to primarily assess AEs associated with pediatric MT.

After extensive search in multiple databases and including non-English studies we identified 64 adverse events associated with pediatric massage. These events were further classified in mild, moderate and severe by our team. Moderate events were the most frequently identified, closely followed by mild and severe adverse events. Of serious AE identified, abdominal massage to stimulate peristalsis in preterm infants was identified as been associated with multiple reports of volvulus without malrotation.

Volvulus without malrotation (VWM) is considered a rare event, often associated with preterm birth (<30 weeks GA) and low birth weight (<1000 g)[49, 50, 52, 66-69] We identified 17 events of volvulus without malrotation in preterm infants on this review, mostly very low birth weight (VLBW). In five VWM, the authors did not consider MT as a risk factor for the volvulus while for the remaining 12 events, MT was considered a risk factor by authors.[49] The identified cases of VWM led to a routine change in their centers to avoid abdominal massage in preterm infants due the risk of volvulus. All the authors report that changing their practice to avoid abdominal massage in preterm neonates generated no further events of VWM in their centers.[49] The large majority of the events reported in this review occurred in infants born at <30 weeks GA and weighted <1000g, which may be a confounder, since VLBW is consider a risk factor for VWM. Others have reported findings of VWM in preterm infants. Horsch has reviewed cases of volvulus in surgical referral center over 8 years in Germany and found 3 preterm infants with VWM, of these, 1 received properistaltic abdominal massage.[70] Yarkin after reviewing 2 years of data from an epidemiological survey identified that 12 of 15 cases of low birth weight (<1500g) pre term infants with VWM had abdominal massages prior to the event, although due the uncontrolled study design they were unable to determine abdominal massage as a direct risk factor.[71] Horsch and Yarkin were not included this review because they did not look into MT specifically. Several authors[49, 70, 72, 73] have speculated on other risk factors for VWM, including immaturity of the intestine resulting in

1 prolonged transit times and stool retention, use of continuous positive airway pressure (CPAP) or other intensive respiratory support, and female gender. Several  
2 of these risk factors were also identified in the included reports and it makes difficult to assure causality of MT in the development of VWM.  
3

4 Massage therapy has been studied in children, but with the main focus of assessing efficacy, very little has been reported on adverse events.[18-21, 24-30] In  
5 contrast, adults report a wide range of adverse events associated with massage, from mild events to severe, including: cerebrovascular accidents,  
6  
7 thromboembolism (renal, pulmonary), skin injury, leg ulcer, genitourinary injuries disc herniation, soft tissue trauma, neurologic compromise, spinal cord injury,  
8  
9 dissection of the vertebral arteries".[8, 34, 35] Although, it is difficult to compare the different populations and co-morbidities associated with each.  
10  
11

12 Similar to other studies,[74] this review reveals a lack of adverse events reporting. The majority of included studies did not report if the intervention was  
13 associated with any adverse event or not, leading to significant reporting bias from the primary studies and carried into the review level, confirming the true  
14  
15 magnitude of adverse events related to massage in pediatrics remains unknown.  
16  
17

18 Similar to other studies this review reveals a lack of adverse events reporting in general. The majority of included studies did not report if the intervention was  
19 associated with any adverse event or not, leading to significant reporting bias from the primary studies and carried into the review level, unknowing the true  
20  
21 magnitude of adverse events related to massage in pediatrics.[74]  
22  
23  
24  
25

## 26 Strengths and limitation

27 This review was inclusive in searching peer-reviewed publications in seven databases from inception onwards, not limiting by language. We minimized  
28  
29 subjective errors by independent duplicate screening, study selection, and data extraction. This SR meticulously collected data from included studies and  
30  
31 classified severities of AEs according to well-established criteria. We have incorporated to this review all relevant studies, including case reports, case series, and  
32  
33 clinical trials in an effort to be comprehensive. In addition, we reported studies that reported if AEs occurred or not, whether they mentioned if AEs were assessed  
34  
35  
36  
37  
38  
39  
40  
41  
42  
43  
44

1 or not, except for case reports which were only included if an event was reported.

2 As any study, this review has limitations. The majority of the AEs, were described in case series/reports. Although case studies are well-recognized sources of  
3 reports on severe, unusual, and/or rare AEs, conclusions drawn from such sources are limited and subject t of confounding factors. Additionally, given the limited  
4 information and heterogeneity of the data reported in the included studies, it was not possible to identify any conclusive association between MT and specific  
5  
6 AEs, except for ba sha massage which caused a characteristic bruising.  
7  
8  
9

10 Risk of bias was not performed due the nature of included studies.  
11  
12  
13

14  
15 Clinical relevance of review findings:  
16

17 The most significant review finding warranting clinical surveillance is the association between abdominal massage and VWM in pre term infants. There are  
18 several confounder s impeding this review to define a causal relationship between neonatal abdominal massage and VWM, but the reports should be taken into  
19 careful consideration and abdominal massage should be consider with caution on this population.  
20  
21  
22  
23  
24

## 25 CONCLUSIONS

26  
27 We were able to identify a range of AEs associated with MT use, from mild to severe. Unfortunately, the majority of included studies did not report if an adverse  
28 event occurred or not, leading to publication bias. This review reports an association between abdominal massage with volvulus without malrotation in preterm  
29 infants, it is still to be defined if this is casual or not, but our findings warrant caution in the use of abdominal massage in pre term infants until further  
30  
31 investigation is done in the subject.  
32  
33

## 34 Acknowledgements

35  
36  
37  
38  
39  
40  
41  
42  
43  
44  
45  
46  
47

1  
2  
3  
4  
5  
6  
7  
8  
9  
10  
11  
12  
13  
14  
15  
16  
17  
18  
19  
20  
21  
22  
23  
24  
25  
26  
27  
28  
29  
30  
31  
32  
33  
34  
35  
36  
37  
38  
39  
40  
41  
42  
43  
44  
45  
46  
47

We thank Susanne King-Jones for searching databases, library support and reviewing the manuscript; Katherine Smith, Sheena Sikora, Kerri Gladwin, Maleka Ramji, and Namrata Hansraj for screening; Samaneh Khanpour Ardestani, Susanne King-Jones, Tatiana Kryuchkova, Natalia Liapounova, Melissa Morelli-Lacroix, Derek Wang, Amy Wolgemuth, Hai Chuan Yu, and Liliane Zorzela for translation of non-English papers. We thank Denise Adams for her contributions to the early development of this work.

**References:**

1. National Institutes of Health. Exploring the Science of Complementary and Integrative Health. National Center for Complementary and Integrative Health 2016 Strategic Plan [Internet]. 2016.
2. Health Canada. Complementary and Alternative Health Care: The Other Mainstream? Health Policy Research Bulletin [Internet]. 2003; (7):[1-48 pp.]. Available from: <http://www.hc-sc.gc.ca/sr-sr/pubs/hpr-rpms/bull/2003-7-complement/index-eng.php>.
3. The College of Massage Therapists of Ontario. About Massage Therapy 2019 [July 2019]. Available from: <https://www.cmto.com/about-the-profession/about-massage-therapy/>.
4. The College of Massage Therapists of Ontario. About Massage Therapists in Ontario 2019 [July 2019]. Available from: <https://www.cmto.com/about-the-profession/>.
5. National Institutes of Health. Massage Therapy: An Introduction. National Center for Complementary and Integrative Health 2016 Strategic Plan [Internet]. 2016. Available from: <https://nccih.nih.gov/health/massage/massageintroduction.htm>.
6. National Institutes of Health. rMassage Therapy for Health Purposes. National Center for Complementary and Integrative Health 2016 Strategic Plan [Internet]. 2016. Available from: <https://nccih.nih.gov/health/massage/massageintroduction.htm>.
7. Sagar S, Dryden T, Wong RK. Massage therapy for cancer patients: a reciprocal relationship between body and mind. *Current oncology*. 2007;14(2).
8. Ernst E. The safety of massage therapy. *Rheumatology*. 2003;42(9):1101-6.
9. National Institutes of Health. The use of Complementary and Alternative Medicine in the United States. National Center for Complementary and Integrative Health 2016 Strategic Plan [Internet]. 2007. Available from: [https://nccih.nih.gov/research/statistics/2007/camsurvey\\_fs1.htm](https://nccih.nih.gov/research/statistics/2007/camsurvey_fs1.htm).
10. Adams D, Dagenais S, Clifford T, et al. Complementary and alternative medicine use by pediatric specialty outpatients. *Pediatrics*. 2013;131(2):225-32.
11. Revuelta-Iniesta R, Wilson ML, White K, et al. Complementary and alternative medicine usage in Scottish children and adolescents during cancer treatment. *Complement Ther Clin Pract*. 2014;20(4):197-202.
12. Adams D, Schiffgen M, Kundu A, et al. Patterns of utilization of complementary and alternative medicine in 2 pediatric gastroenterology clinics. *J Pediatr Gastroenterol Nutr*. 2014;59(3):334-9.
13. Galicia-Connolly E, Adams D, Bateman J, et al. CAM use in pediatric neurology: an exploration of concurrent use with conventional medicine. *PLoS One*. 2014;9(4):e94078.
14. Richmond E, Adams D, Dagenais S, et al. Complementary and alternative medicine: A survey of its use in children with chronic respiratory illness. *Can J Respir Ther*. 2014;50(1):27-32.
15. Field T. Pediatric Massage Therapy Research: A Narrative Review. *Children*. 2019;6(6):78.
16. Guan L, Collet JP, Yuskiv N, et al. The effect of massage therapy on autonomic activity in critically ill children. *Evid Based Complement Alternat Med*. 2014;2014:656750.
17. Nelson NL. Massage therapy: understanding the mechanisms of action on blood pressure. A scoping review. *J Am Soc Hypertens*. 2015;9(10):785-93.
18. Field TM. Massage therapy effects. *American Psychologist*. 1998;53(12):1270-81.
19. Bennett C, Underdown A, Barlow J. Massage for promoting mental and physical health in typically developing infants under the age of six months. *The Cochrane database of systematic reviews*. 2013;4:CD005038.
20. Field T, Diego M, Hernandez-Reif M. Preterm Infant Massage Therapy Research: A Review. *Infant behavior & development*. 2010;33(2):115-24.
21. Beider S, Moyer CA. Randomized Controlled Trials of Pediatric Massage: A Review. *Evidence-based Complementary and Alternative Medicine*. 2007;4(1):23-34.
22. Shin ES, Seo KH, Lee SH, et al. Massage with or without aromatherapy for symptom relief in people with cancer. *Cochrane Database Syst Rev*. 2016(6):Cd009873.
23. Tsao JCI, Zeltzer LK. Complementary and Alternative Medicine Approaches for Pediatric Pain: A Review of the State-of-the-science. *Evidence-based Complementary and Alternative Medicine*. 2005;2(2):149-59.
24. Juneau AL, Aita M, Heon M. Review and Critical Analysis of Massage Studies for Term and Preterm Infants.

Neonatal Netw. 2015;34(3):165-77.

25. Shipwright S, Dryden T. Paediatric massage: an overview of the evidence. Focus on Alternative and Complementary Therapies. 2012;17(2):103-10.
26. Kulkarni A, Kaushik JS, Gupta P, et al. Massage and touch therapy in neonates: the current evidence. Indian pediatrics. 2010;47(9):771.
27. Ireland M, Olson M. Massage therapy and therapeutic touch in children: state of the science. Altern Ther Health Med. 2000;6(5):54-63.
28. Field T. Massage therapy for infants and children. Journal of Developmental & Behavioral Pediatrics. 1995;16(2):105-11.
29. Moyer CA, Seefeldt L, Mann ES, et al. Does massage therapy reduce cortisol? A comprehensive quantitative review. J Bodyw Mov Ther. 2011;15(1):3-14.
30. Li X, Zhong Q, Tang L. A Meta-Analysis of the Efficacy and Safety of Using Oil Massage to Promote Infant Growth. Journal of Pediatric Nursing: Nursing Care of Children and Families. 2016;31(5):e313-e22.
31. Ernst E. Serious adverse effects of unconventional therapies for children and adolescents: a systematic review of recent evidence. European Journal of Pediatrics. 2003;162(2):72-80.
32. Ram SP, Kyaw K, Noor AR. Haematoma testes due to traditional massage in a neonate. Trop Doct. 1994;24(2):81-2.
33. Kalinga MJ, Lo NN, Tan SK. Popliteal artery pseudoaneurysm caused by an osteochondroma--a traditional medicine massage sequelae. Singapore Med J. 1996;37(4):443-5.
34. Posadzki P, Ernst E. The safety of massage therapy: an update of a systematic review. Focus on Alternative and Complementary Therapies. 2013;18(1):27-32.
35. Yin P, Gao N, Wu J, et al. Adverse Events of Massage Therapy in Pain-Related Conditions: A Systematic Review. Evidence-Based Complementary and Alternative Medicine. 2014;2014:11.
36. Ernst E, Barnes J. Methodological approaches to investigating the safety of complementary medicine. Complementary Therapies in Medicine. 1998;6(3):115-21.
37. Chou R, Aronson N, Atkins D, et al. AHRQ series paper 4: assessing harms when comparing medical interventions: AHRQ and the effective health-care program. J Clin Epidemiol. 2010;63(5):502-12.
38. Zorzela L, Loke YK, Ioannidis JP, et al. PRISMA harms checklist: improving harms reporting in systematic reviews. BMJ. 2016;352:i157.
39. Moher D, Liberati A, Tetzlaff J, et al. Preferred reporting items for systematic reviews and meta-analyses: the PRISMA statement. International journal of surgery (London, England). 2010;8(5):336-41.
40. Golder S, Loke YK. Search strategies to identify information on adverse effects: a systematic review. Journal of the Medical Library Association. 2009;97(2):84.
41. Higgins JPT, Thomas J, Chandler J, et al. Cochrane Handbook on Systematic Reviews of Interventions version 6.0. available from [www.training.cochrane.org/handbook](http://www.training.cochrane.org/handbook). 2019.
42. CTCAE. Common Terminology Criteria for Adverse Events; Version 4. US Department of Health and Human Services, National Institute of Health, National Cancer Institute; 2010.
43. Zorzela L, Mior S, Boon H, et al. Tool to assess causality of direct and indirect adverse events associated with therapeutic interventions. Curr Med Res Opin. 2018;34(3):407-14.
44. Razafimahandry HJC, Rakoto-Ratsimba HN, Rakotoarisoa B, et al. Special features of humeral osteomyelitis in four children in Madagascar France: Institut de Medecine Tropicale; 2007 [cited 67 3]. 275].
45. Ioannidis JP, Evans SJ, Gøtzsche PC, et al. Better reporting of harms in randomized trials: an extension of the CONSORT statement. Annals of internal medicine. 2004;141(10):781-8.
46. Edwards IR, Aronson JK. Adverse drug reactions: definitions, diagnosis, and management. Lancet. 2000;356(9237):1255-9.
47. Ioannidis JP, Lau J. Completeness of safety reporting in randomized trials: an evaluation of 7 medical areas. Jama. 2001;285(4):437-43.
48. Loke YK, Derry S. Reporting of adverse drug reactions in randomised controlled trials - a systematic survey. BMC Clin Pharmacol. 2001;1:3.
49. Maas C, Hammer S, Kirschner HJ, et al. Late-onset volvulus without malrotation in extremely preterm infants--a

case-control-study. BMC Pediatrics. 2014;14:287.

- 1 50. Zweifel N, Meuli M, Subotic U, et al. Manufactured volvulus. Eur J Pediatr Surg. 2013;23(3):234-7.
- 2 51. Paraskevopoulos E. AR. Volvulus in two preterm infants: abdominal massage as a risk factor? Swiss Society of
- 3 Neonatology. 2006:1-10.
- 4 52. Billiemaz K, Varlet F, Patural H, et al. Intestinal volvulus in extremely premature infants. Arch Pediatr.
- 5 2001;8(11):1181-4.
- 6 53. Guilbert J, Flamant C, Hallalel F, et al. Anti-flatulence treatment and status epilepticus: a case of camphor
- 7 intoxication. Emergency Medicine Journal. 2007;24(12):859.
- 8 54. Rudnicki J, Boberski M, Butrymowicz E, et al. Recording of amplitude-integrated electroencephalography,
- 9 oxygen saturation, pulse rate, and cerebral blood flow during massage of premature infants. Am J Perinatol.
- 10 2012;29(7):561-6.
- 11 55. Masoodi T, Mufti GN, Bhat JI, et al. Neonatal mastitis: a clinico-microbiological study. Journal of Neonatal
- 12 Surgery. 2014;3(1):2.
- 13 56. Patel Gera M, Haynes A. Case 6: Bruising and Bleeding in a 6-week-old Boy. Pediatr Rev. 2017;38(3):144.
- 14 57. Medvedev EA. Case of acute unilateral neurosensory hearing loss caused by massage of the trapezius muscle.
- 15 Vestn Otorinolaringol. 1994(3):38-9.
- 16 58. Solanki K, Matnani M, Kale M, et al. Transcutaneous absorption of topically massaged oil in neonates. Indian
- 17 pediatrics. 2005;42(10):998.
- 18 59. Sankaranarayanan K, Mondkar JA, Chauhan MM, et al. Oil massage in neonates: an open randomized controlled
- 19 study of coconut versus mineral oil. Indian pediatrics. 2005;42(9):877.
- 20 60. Huang FY, Huang LM. Effect of local massage on vaccination: DTP and DTPa. Acta Paediatrica Taiwanica.
- 21 1999;40(3):166.
- 22 61. Hsu CY, Huang LM, Lee CY, et al. Local massage after vaccination enhances the immunogenicity of diphtheria-
- 23 tetanus-pertussis vaccine. Pediatr Infect Dis J. 1995;14(7):567-72.
- 24 62. Cullen LA, Barlow JH, Cushway D. Positive touch, the implications for parents and their children with autism: an
- 25 exploratory study. Complement Ther Clin Pract. 2005;11(3):182-9.
- 26 63. Beaver PK. Premature infants' response to touch and pain: can nurses make a difference? Neonatal Netw.
- 27 1987;6(3):13-7.
- 28 64. Li Z, Huan Z, Byard RW. Bruising caused by traditional Chinese massage therapy (ba sha) complicating the
- 29 assessment of a case of fatal child abuse. Journal of Forensic and Legal Medicine. 2015;36:49.
- 30 65. Goncharov OV. Massage with aromatic oils in complex rehabilitation of children with aftereffects of perinatal
- 31 hypoxic lesions of the central nervous system Russian Federation2007 [2]. 18]. Available from:
- 32 <http://ovidsp.ovid.com/ovidweb.cgi?T=JS&PAGE=reference&D=emed8&NEWS=N&AN=17566172>.
- 33 66. Yarkin Y, Maas C, Franz AR, et al. Epidemiological study on intestinal volvulus without malrotation in VLBW
- 34 infants. Arch Dis Child Fetal Neonatal Ed. 2019;104(4):F415-f8.
- 35 67. Mark S, Schlößer R, Gfroerer S, et al. Verfall des Allgemeinzustands eines Frühgeborenen. Monatsschrift
- 36 Kinderheilkunde. 2013;161(4):296-8.
- 37 68. Raherison R, Grosos C, Lemale J, et al. [Prenatal intestinal volvulus: A life-threatening event with good long-term
- 38 outcome]. Arch Pediatr. 2012;19(4):361-7.
- 39 69. Drewett M, Burge DM. Late-onset volvulus without malrotation in preterm infants. J Pediatr Surg.
- 40 2009;44(2):358-61.
- 41 70. Horsch S, Albayrak B, Trobs RB, et al. Volvulus in term and preterm infants - clinical presentation and outcome.
- 42 Acta Paediatr. 2016;105(6):623-7.
- 43 71. Yarkin Y, Maas C, Franz AR, et al. Epidemiological study on intestinal volvulus without malrotation in VLBW
- 44 infants. Arch Dis Child Fetal Neonatal Ed. 2018.
- 45 72. Berseth CL. Gestational evolution of small intestine motility in preterm and term infants. The Journal of
- 46 Pediatrics. 1989;115(4):646-51.
- 47 73. Kargl S, Wagner O, Pumberger W. Volvulus without malposition—a single-center experience. Journal of Surgical
- 48 Research. 2015;193(1):295-9.
- 49 74. Anderson M, Choonara I. A systematic review of safety monitoring and drug toxicity in published randomised
- 50
- 51
- 52
- 53
- 54
- 55
- 56
- 57
- 58
- 59
- 60

controlled trials of antiepileptic drugs in children over a 10-year period. Arch Dis Child. 2010;95(9):731-8.

1  
2  
3  
4  
5  
6  
7  
8  
9  
10  
11  
12  
13  
14  
15  
16  
17  
18  
19  
20  
21  
22  
23  
24  
25  
26  
27  
28  
29  
30  
31  
32  
33  
34  
35  
36  
37  
38  
39  
40  
41  
42  
43  
44  
45  
46  
47  
48  
49  
50  
51  
52  
53  
54  
55  
56  
57  
58  
59  
60



**Figure 1: PRISMA diagram for systematic review of pediatric massage therapy adverse events (AE)**

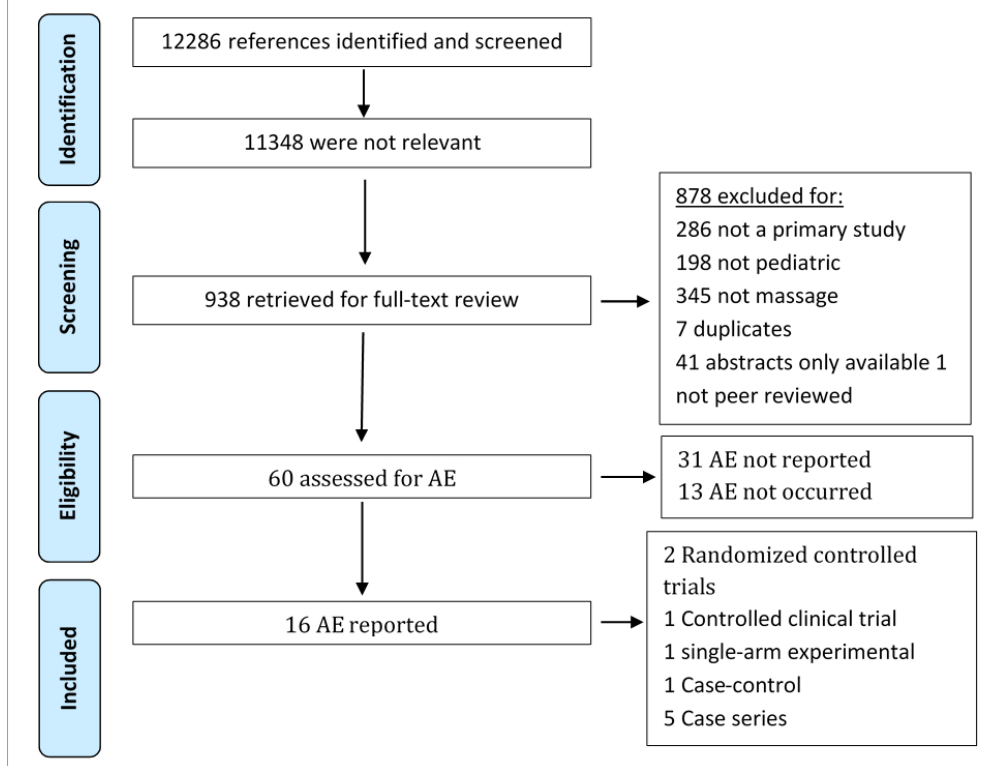

**Appendix: Medline search strategy for pediatric massage therapy adverse events**

1. abhyanga.tw.
2. acupressure.tw.
3. acupressure/
4. Amma.tw.
5. Anma.tw.
6. Anmo.tw.
7. Aromatherapy massage.tw.
8. ashiatsu oriental bar therap\$.tw.
9. aston pattern\$.tw.
10. augmented soft tissue mobilization.tw.
11. augmented soft-tissue mobilization.tw.
12. balinese massage.tw.
13. belavi facelift massage.tw.
14. bidegewebsmassage.tw.
15. bidegewebs massage.tw.
16. bodywork.tw.
17. (bowen adj1 (therap\$ or technique or work)).mp. [mp=ti, ot, ab, nm, hw]
18. budzek medical massage.tw.
19. chih ya.tw.
20. classical massage.tw.
21. connective tissue massage.tw.
22. (craniosacral adj1 (massage or therap\$)).tw.
23. deep-tissue massage.tw.
24. deep tissue massage.tw.
25. Esalen.mp. [mp=ti, ot, ab, nm, hw]
26. foot reflexion massage.tw.
27. four-hand massage.tw.
28. generic massage.tw.
29. hellerwork.tw.
30. hoshino therap\$.tw.
31. hot stone massage.tw.
32. huna kane.tw.
33. ice massage.tw.
34. ingham method.tw.
35. jamu.tw.

- 1
  - 2
  - 3
  - 4
  - 5
  - 6
  - 7
  - 8
  - 9
  - 10
  - 11
  - 12
  - 13
  - 14
  - 15
  - 16
  - 17
  - 18
  - 19
  - 20
  - 21
  - 22
  - 23
  - 24
  - 25
  - 26
  - 27
  - 28
  - 29
  - 30
  - 31
  - 32
  - 33
  - 34
  - 35
  - 36
  - 37
  - 38
  - 39
  - 40
  - 41
  - 42
  - 43
  - 44
  - 45
  - 46
  - 47
  - 48
  - 49
  - 50
  - 51
  - 52
  - 53
  - 54
  - 55
  - 56
  - 57
  - 58
  - 59
  - 60
36. Jin Shin Do.tw.
37. korean martial therap\$.tw.
38. lomilomi.tw.
39. looyen work.tw.
40. Lymphatic drainage.tw.
41. lypposage.tw.
42. manual lymph drainage.tw.
43. manual stimulat\$.tw.
44. marma massage.tw.
45. exp massage/
46. massage.tw.
47. massotherapy.tw.
48. medical massage.tw.
49. Meridian massage.tw.
50. muscle energy technique\$.tw.
51. (myofascial adj1 (mobilization or release)).tw.
52. Myomassolog\$.tw.
53. myopathic muscular therap\$.tw.
54. Myotherap\$.tw.
55. naprapath\$.tw.
56. (neuromuscular adj1 (facilitat\$ or therap\$ or technique\$ or massage)).tw.
57. nuad bo rarn.tw.
58. nuat thai.tw.
59. oil massage.tw.
60. onsen technique.tw.
61. oncology massage.tw.
62. oriental bodywork.tw.
63. orthopedic massage.tw.
64. pfrimmer deep muscle therap\$.tw.
65. \*physical stimulation/
66. physical stimulat\$.tw.
67. phytotherapy.tw.
68. point holding.tw.
69. process accupressure.tw.
70. rebalancing.tw.
71. reflex zone massage.tw.
72. reflexognosy.tw.

- 1  
2  
3  
4  
5  
6  
7  
8  
9  
10  
11  
12  
13  
14  
15  
16  
17  
18  
19  
20  
21  
22  
23  
24  
25  
26  
27  
28  
29  
30  
31  
32  
33  
34  
35  
36  
37  
38  
39  
40  
41  
42  
43  
44  
45  
46  
47  
48  
49  
50  
51  
52  
53  
54  
55  
56  
57  
58  
59  
60
73. reflexology.tw.
  74. reposturing dynamics.tw.
  75. rolfing.tw.
  76. (Rosen adj1 (method\$ or massage)).tw.
  77. russian massage.tw.
  78. Shiatsu.tw.
  79. shiatzu.tw.
  80. exp shiatsu/
  81. (soft tissue adj1 (manipulat\$ or mobilizat\$ or release)).tw.
  82. sport\$ massage.tw.
  83. (strain-counterstrain adj1 (therap\$ or massage or technique)).tw.
  84. structural integrat\$.tw.
  85. swedish massage.tw.
  86. tactile stimulat\$.tw.
  87. thai massage.tw.
  88. tibetan massage.tw.
  89. tibetan point holding.tw.
  90. (trager adj1 (approach or technique or therap\$ or massage)).tw.
  91. triggerpoint massage.tw.
  92. Tuina.tw.
  93. tui na.tw.
  94. zero balanc\$.tw.
  95. zhi ya.tw.
  96. zhiya.tw.
  97. zone therap\$.tw.
  98. or/1-97
  99. (exp massage/ or massage.tw.) adj3 (carotid body/ or exp carotid arteries/ or carotid.tw. or heart.tw. or cardiac.tw. or sinus.tw. or uterine.tw. or udder.tw. or prostatic.tw. or prostate.tw. or cornea.tw. or ocular.tw. or intraocular pressure/ or glaucoma/ or decubitus ulcer.mp. or vagal.mp.)
  100. 98 not 99
  101. (ae or co or et).fs.
  102. ((Side or Advers\$) adj3 (effect\$ or affect\$ or reaction\$ or event\$)).tw.
  103. (risk\$ or harm\$ or aetiology\$ or etiolog\$ or cause or causation or causing or causal\$ or complicat\$).tw.
  104. exp risk/
  105. (risk-benefit adj5 (analy\$ or ratio\$ or assess\$)).mp.
  106. exp causality/

- 1  
2  
3  
4 107. significant event.tw.  
5 108. exp Safety/  
6 109. safe\$.tw.  
7  
8 110. aggravation\$.tw.  
9  
10 111. consequences.tw.  
11 112. injury.tw.  
12 113. exp "Wounds and Injuries"/  
13  
14 114. case report\$.tw.  
15 115. or/101-114  
16 116. anemia.tw.  
17  
18 117. bruising.tw.  
19 118. exp Hematoma/ or exp Purpura/ or exp Contusions/ or exp Hemorrhage/ or exp Ecchymosis/  
20  
21 119. bruise.tw.  
22 120. carotid artery stenosis.tw.  
23  
24 121. exp Dislocations/  
25 122. dilocation\$.tw.  
26  
27 123. exp Hearing Loss/  
28 124. hearing loss.tw.  
29  
30 125. hearing deterioration.tw.  
31 126. abscess.tw.  
32 127. abscess/  
33  
34 128. displacement of stent.tw.  
35 129. stent displacement.tw.  
36  
37 130. eczema.tw.  
38 131. eczema/  
39  
40 132. embolization.tw.  
41 133. exp Embolization, Therapeutic/ or exp Pulmonary Embolism/  
42  
43 134. fetal haemorrhage.tw.  
44 135. fracture.tw.  
45 136. fracture/  
46  
47 137. haematoma.tw.  
48 138. hematoma.tw.  
49  
50 139. infection.tw.  
51 140. nerve damage.tw.  
52  
53 141. pain.tw.  
54 142. exp Pain/  
55  
56 143. posterior interosseous syndrome.tw.  
57  
58  
59  
60

- 1  
2  
3  
4 144. pseudoaneurysm.tw.  
5 145. exp Aneurysm, False/  
6 146. exp Pulmonary Embolism/  
7  
8 147. ruptured colon.tw.  
9 148. ruptured uterus.tw.  
10  
11 149. swell\$.tw.  
12 150. strangulation.tw.  
13  
14 151. exp Asphyxia/ or exp Neck Injuries/  
15 152. exp Thyrotoxicosis/  
16 153. thyrotoxicosis.tw.  
17  
18 154. ulceration.tw.  
19 155. exp Ulcer/  
20 156. weak\$.tw.  
21  
22 157. or/116-156  
23 158. 115 or 157  
24  
25 159. exp infant, newborn/  
26 160. infant/  
27  
28 161. exp child, preschool/  
29 162. child/  
30  
31 163. exp puberty/  
32 164. minors/  
33  
34 165. adolescent/  
35 166. (newborn\$ or new-born\$ or infan\$ or baby\$ or babies\$ or preemie\$ or prematur\$).tw.  
36 167. toddler\$.tw.  
37  
38 168. (preschool\$ or pre-school\$).tw.  
39 169. nursery school\$.tw.  
40  
41 170. (kindergarten\$ or kindergarden\$).tw.  
42 171. (child\$ or kid or kids or boy\$ or girl\$).tw.  
43 172. elementary school\$.tw.  
44 173. (schoolchild\$ or "school child\$").tw.  
45 174. (schoolage\$ or school age\$).tw.  
46 175. ("junior high\$" or "middle school\$").tw.  
47 176. youth\$.tw.  
48 177. (teen\$ or adolescen\$ or juvenil\$ or "young adult\$" or pubert\$ or underage\$ or "under age\$").tw.  
49 178. (pubescen\$ or pre-pubescen\$ or prepubescen\$ or post-pubescen\$ or postpubescen\$).tw.  
50 179. secondary school\$.tw.  
51 180. (high school\$ or highschool\$).tw.  
52  
53  
54  
55  
56  
57  
58  
59  
60

1  
2  
3  
4 181. exp Pediatrics/  
5

6 182. pediatric\$.tw.  
7

8 183. paediatric.tw.  
9

10 184. or/159-183  
11

12 185. 100 and 158 and 184  
13  
14  
15  
16  
17  
18  
19  
20  
21  
22  
23  
24  
25  
26  
27  
28  
29  
30  
31  
32  
33  
34  
35  
36  
37  
38  
39  
40  
41  
42  
43  
44  
45  
46  
47  
48  
49  
50  
51  
52  
53  
54  
55  
56  
57  
58  
59  
60

# BMJ Paediatrics Open

## Adverse events associated with pediatric massage therapy: a systematic review

|                               |                                                                                                                                                                                                                                                                |
|-------------------------------|----------------------------------------------------------------------------------------------------------------------------------------------------------------------------------------------------------------------------------------------------------------|
| Journal:                      | <i>BMJ Paediatrics Open</i>                                                                                                                                                                                                                                    |
| Manuscript ID                 | bmjpo-2019-000584.R2                                                                                                                                                                                                                                           |
| Article Type:                 | Review                                                                                                                                                                                                                                                         |
| Date Submitted by the Author: | 13-Mar-2020                                                                                                                                                                                                                                                    |
| Complete List of Authors:     | Karkhaneh, Mohamad; University of Alberta<br>Zorzela, Liliane; University of Alberta, Pediatrics<br>Jou, Hsing; University of Alberta<br>Funabashi, Martha; University of Alberta<br>Dryden, Trish; Centennial College<br>Vohra, Sunita; University of Alberta |
| Keywords:                     | Musculo-Skeletal                                                                                                                                                                                                                                               |
|                               |                                                                                                                                                                                                                                                                |

SCHOLARONE™  
Manuscripts





I, the Submitting Author has the right to grant and does grant on behalf of all authors of the Work (as defined in the below author licence), an exclusive licence and/or a non-exclusive licence for contributions from authors who are: i) UK Crown employees; ii) where BMJ has agreed a CC-BY licence shall apply, and/or iii) in accordance with the terms applicable for US Federal Government officers or employees acting as part of their official duties; on a worldwide, perpetual, irrevocable, royalty-free basis to BMJ Publishing Group Ltd ("BMJ") its licensees and where the relevant Journal is co-owned by BMJ to the co-owners of the Journal, to publish the Work in this journal and any other BMJ products and to exploit all rights, as set out in our [licence](#).

The Submitting Author accepts and understands that any supply made under these terms is made by BMJ to the Submitting Author unless you are acting as an employee on behalf of your employer or a postgraduate student of an affiliated institution which is paying any applicable article publishing charge ("APC") for Open Access articles. Where the Submitting Author wishes to make the Work available on an Open Access basis (and intends to pay the relevant APC), the terms of reuse of such Open Access shall be governed by a Creative Commons licence – details of these licences and which [Creative Commons](#) licence will apply to this Work are set out in our licence referred to above.

Other than as permitted in any relevant BMJ Author's Self Archiving Policies, I confirm this Work has not been accepted for publication elsewhere, is not being considered for publication elsewhere and does not duplicate material already published. I confirm all authors consent to publication of this Work and authorise the granting of this licence.

**Adverse events associated with pediatric massage therapy: a systematic review**

Karkhaneh M. MD PhD<sup>1</sup>; Zorzela L, MD PhD<sup>2</sup>; Jou H. MD<sup>3</sup>; Funabashi M. PhD<sup>4</sup>; Dryden T. RMT, M.Ed.<sup>5</sup>; Vohra, S. MD MSc<sup>6</sup>

**Affiliations:**

- 1- Research Associate, Department of Medicine, Faculty of Medicine & Dentistry, University of Alberta
- 2- Assistant Clinical Professor, Department of Pediatrics, Faculty of Medicine & Dentistry, University of Alberta
- 3- Associate Professor, Department of Pediatrics, Faculty of Medicine & Dentistry, University of Alberta
- 4- Post Doctoral student at Department of Pediatrics, Faculty of Medicine & Dentistry, University of Alberta
- 5- Associate Vice President, Research and Corporate Planning, Centennial College, Toronto, ON
- 6- Professor, Department of Pediatrics, Medicine, and Psychiatry, Faculty of Medicine & Dentistry, University of Alberta

**Corresponding author:** Sunita Vohra, Dept of Pediatrics, University of Alberta; 1702 College Plaza, 8215 - 112 Street NW; Edmonton, AB; Canada T6G 2C8; Fax: 780-492-5883; email: svohra@ualberta.ca

**Short title:** Adverse events associated with pediatric massage

**Conflict of interest:** The authors have no conflicts of interest relevant to this article to disclose

**Funding source:** this manuscript received no external funding.

**Abbreviations:**

AE – adverse events

EEG - electroencephalography

GA- Gestational age

MT- massage therapy

RCT- randomized controlled trial

VWM-Volvulus without malrotation

**Table of contents summary:**

Massage therapy is frequently used in children. To date, no study has systematically assessed its safety. This review reports safety of massage in children.

What is known:

- Massage therapy has been widely used for many different indications in children and adults.
- Several studies report its efficacy, but adverse events of massage therapy is poorly investigated.

What this study adds:

- A range of AEs associated with MT use, from mild to severe.
- An association between abdominal MT in preterm neonates and volvulus without malrotation, the causality of this association is yet to be determined

Until further data are identified extreme causation on the use of abdominal massage in preterm neonates is warranted

**Contribution statement:** Dr Vohra and Dr Jou and Dryden conceptualized and designed the study, reviewed and critically reviewed the manuscript for important intellectual content.

Drs Karkhaneh and Zorzela and Funabashi designed the data collection instruments, collected data, carried out the initial analyses, and drafted the manuscript reviewed and revised the manuscript.

All authors approved the final manuscript as submitted and agree to be accountable for all aspects of the work.

**All data relevant to the study are included in the article or uploaded as supplementary information.**

**ABSTRACT**

**Introduction:** Massage therapy (MT) is frequently used in children. No study has systematically assessed its safety in children and adolescents. We systematically review adverse events (AEs) associated with pediatric MT.

**Methods:** We searched seven electronic databases from inception to December 2018. We included studies if they: (i) were primary studies published in a peer-reviewed journal, (ii) involved children aged 0-18 years, and (iii) a type of MT was used for any indication. No restriction was applied to language, year of publication, and study design. AEs were classified based on their severity and association to the intervention.

**Results:** Literature searches identified 12,286 citations, of which 938 citations were retrieved for full-text evaluation and 60 studies were included. In the included studies, 31 (51.6%) did not report any information on AEs, 13 (21.6%) reported that no AE occurred, and 16 studies (26.6%) reported at least one AE after MT. There were 20 mild events (grade 1) that resolved with minimal intervention, 26 moderate events (grade 2-3) that required medical intervention, and 18 cases of severe AEs (grade 4-5) that resulted in hospital admission or prolongation of hospital stay; of these, 17 AE were volvulus in premature infants, four of which were ultimately fatal events.

**Conclusion:**

We identified a range of AEs associated with MT use, from mild to severe. Unfortunately, the majority of included studies did not report if an adverse event occurred or not, leading to publication bias. This review reports an association between abdominal massage with volvulus without malrotation in preterm infants, it is still to be defined if this is casual or not, but our findings warrant caution in the use of abdominal massage in preterm infants.

## BACKGROUND

Massage therapy (MT) is one of the most popular complementary therapies in North America and has a long history of practice.[1, 2] According to the College of Massage Therapists of Ontario, “Massage therapy consists primarily of hands-on manipulation of the soft tissues of the body, specifically, the muscles, connective tissue, tendons, ligaments and joints for the purpose of optimizing health. Massage therapy treatment has a therapeutic effect on the body and optimizes health and well-being by acting on the muscular, nervous and circulatory systems”.[3]

Massage therapists press, rub and manipulate muscles and soft tissues of the body, often with their hands and fingers, to relieve physical dysfunction and pain, reduce stress, promote relaxation, reduce anxiety or depression, and improve general wellbeing.[4, 5]

Various types of MTs have been practiced using specific techniques, including Swedish, Thai, shiatsu, tui na, connective tissue, deep tissue, myofascial, trigger point, etc.[6-8]

Massage is used in children around the world, including countries where massage is not part of their traditional medicine practices. Close to 1% of American children use MT.[9] In Canada, a survey involving 979 families attending subspecialty clinics, demonstrated that the most common complementary therapy reported was massage, with 39.1% reporting use.[10] In Europe, the frequency of massage use varies from 8.7 to 29% in a subpopulation of children with oncologic disorders.[11] MT is frequently used in children with health problems and its use is as high as 47% in patients with neurologic disorders, 38% in patients with cardiac disorders and 34% in patients with respiratory disorders.[12-14]

Despite MT’s longstanding history and popularity, specific mechanisms by which massage exerts its therapeutic effects are not yet known.[7, 15-17] Researchers have long been interested in MT for children’s health and wellbeing.[18] A recent meta-analysis of clinical trials of MT on infants under six months of age found statistically significant effects on weight and height, improving head/arm/leg circumference, 24-hour sleep duration, lowering blood bilirubin level, and frequency of diarrhea.[19] Among preterm infants, MT enhanced average weight gain and reduced hospital length of stay.[20] In children 2-18 years old, MT has been shown to improve arthritis pain, muscle tone, and decrease anxiety.[21]

1 There is limited evidence supporting MT for cancer pain.[22] and chronic pain in children.[23]

2  
3  
4 Most systematic reviews of pediatric massage therapy have focused on the effectiveness of MT rather than its safety.[18-  
5 21, 24-30] One systematic review included two case reports of AEs among children[8, 31]; one infant with scrotal hematoma  
6 associated with MT of a hydrocele[32] and a teenager with a popliteal artery pseudoaneurysm after MT overlying an  
7 exostosis.[33] AEs reported for adults were more diverse, including: cerebrovascular accidents, disc herniation/spinal cord  
8 injury, thromboembolism (renal, pulmonary), soft tissue trauma, leg ulcer, and genitourinary injuries.[8, 31, 34, 35] These  
9 studies demonstrated that the nature and circumstances of MT AEs for adults are quite different from pediatrics. While  
10 many complementary therapies are considered to be at low risk of harm, safety of health interventions should be measured,  
11 rather than assumed, especially in vulnerable populations, including children.[36, 37]

12  
13 The objective of this systematic review was to identify the evidence of adverse events associated with massage therapy in  
14 children.

## 25 26 27 28 **METHODS**

### 29 **Searching Databases**

30  
31 A systematic review was conducted according to the guidelines of the Preferred Reporting Items for Systematic Review  
32 (PRISMA) Statement and the PRISMA Harms.[38, 39] In consultation with two massage therapists, a health research  
33 librarian designed a comprehensive search strategy. Seven electronic databases were searched from inception to  
34 December 2018. The databases included: Medline, EMBASE, CINAHL, Cochrane Central Registry of Controlled Trials,  
35 Cochrane Database of Systematic Reviews, PsycINFO, Alt HealthWatch. We identified search terms by using key words  
36 including Massage, Adverse Effects, and Pediatrics and a combination of subject terms selected from the controlled  
37 vocabulary or thesaurus (e.g. MeSH - Medical Subject Headings, Emtree for Embase, CINAHL Headings and PsycINFO  
38 Thesaurus) with a wide range of free-text terms.

39 No language restrictions were applied. The search strategy was adapted to follow recommendations by Golder & Loke to  
40 optimize for the retrieval of adverse effects data.[40] The full Medline search strategy is available in Appendix A.  
41  
42  
43  
44  
45  
46  
47  
48  
49  
50  
51  
52  
53  
54  
55  
56  
57  
58  
59  
60

## Study Selection

Studies were eligible to be included if they:

- 1) were a primary study published in a peer-reviewed journal, primary study was defined as “*study reported directly by the researcher that conducted the study*”, rather than depending on data collected from previously done research.
- 2) involved children from birth to 18 years of age, 3) used MT for any indication, studies were not excluded based on conditions leading to MT. The inclusion of studies was not limited by medical condition, training of massage provider, or the presence/absence of a comparison/control intervention. There was no restriction by study design or reporting AE. We excluded studies if they: 1) only applied light touch or 2) only used self-massage, 3) grey literature. Studies of reflexology and studies of massage for lacrimal duct obstruction were also excluded since those were not relevant to this review. Case reports were only included if they reported an AE. Two reviewers performed study selection, independent and in duplicate, and discrepancies were resolved by consensus or a third reviewer.

## Data Extraction

A structured data extraction form was used to collect data from the articles. General characteristics of studies included country, study design, settings, population, age, and gender. Specific information included: indication for treatment, AE severity, N of event, age, (age/weight and age at AE for newborn babies), gender, type of MT, MT practitioner, outcome with severity grade, and notes from the authors. Independent duplicate assessment was performed for both study selection and data extraction.

Adverse events were defined as per the Cochrane handbook as: ‘adverse event is an unfavorable or harmful outcome that occurs during, or after, the use of a drug or other intervention, but is not necessarily caused by it’.[41]

## Data Synthesis

The data from studies were tabulated into general information and AEs tables. The Common Terminology Criteria for Adverse Events (CTCAE) scale was used to classify severity of AEs.[42] (Table 1)

**Table 1: Grading system for severity of adverse events (CTCAE)\***

| Grading        | Description                                                                                                                                                                                                                                                                     |
|----------------|---------------------------------------------------------------------------------------------------------------------------------------------------------------------------------------------------------------------------------------------------------------------------------|
| <b>Grade 1</b> | Mild; asymptomatic or mild symptoms; clinical or diagnostic observations only; intervention not indicated                                                                                                                                                                       |
| <b>Grade 2</b> | Moderate; minimal, local or non-invasive intervention indicated; limiting age-appropriate instrumental Activities of Daily Living (Instrumental ADL: preparing meals, shopping for groceries or clothes, using the telephone, managing money, etc.)                             |
| <b>Grade 3</b> | Severe or medically significant but not immediately life-threatening; hospitalization or prolongation of hospitalization indicated; disabling; limiting self-care ADL (bathing, dressing and undressing, feeding self, using the toilet, taking medications, and not bedridden) |
| <b>Grade 4</b> | Life-threatening consequences; urgent intervention indicated                                                                                                                                                                                                                    |
| <b>Grade 5</b> | Death related to AE                                                                                                                                                                                                                                                             |

\*CTCAE: Common Terminology Criteria for Adverse Events

The severity was categorized into five *grades*, from *grade 1* (mild, asymptomatic) to *grade 5* (death), based on information provided by the studies. Duplicate assessment of CTCAE ratings were performed and discrepancies between two reviewers were resolved by consulting a senior reviewer.

We also classified the AEs as ‘direct’, if directly caused by the intervention, or ‘indirect’, if the intervention caused a delay in diagnosis or treatment which resulted in an adverse event.[43]

Since this was a systematic review of AEs following MT, effectiveness/efficacy of MT was not assessed. We neither performed meta-analysis nor risk of bias assessment. Subgroup analysis was done separating study designs by severity of adverse events to assess if any specific type of massage would lead to more severe events.

## RESULTS

Comprehensive search in seven electronic databases yielded a total of 12,286 citations. Screening titles and abstracts identified 11,348 references irrelevant to the review question; 938 full text articles were retrieved for further evaluation.

By using the pre-specified inclusion/exclusion criteria, 60 studies were included (Figure 1).

The discrepancies were discussed, and consensus was reached between the two reviewers. There were no residual discrepancies.



1  
2 Included studies were published between 1991 and 2018, and were conducted in 11 countries including China (n=1),  
3  
4 France (n=2), Germany (n=1), India (n=3), Iran (n=3), Madagascar (n=1), Malaysia (n=1), Poland (n=1), Russia (n=2),  
5  
6 Singapore (n=1), Sweden (n=1) Switzerland (n=2), United States (n=1) and United Kingdom (n=2). Among 60 studies  
7  
8 with a total population of (n=3557), 29 studies (n=1520) were single arm experimental or case studies that received MT  
9  
10 and 31 studies (n=2037) were studies a comparator/control group, of which almost half (n=972) have received MT and  
11  
12 the rest (n=1065) were controls with no MT. Gestational age (GA) in the preterm infants having MT varied was from 23.5  
13  
14 to 37 weeks. Age of children ranged from 1 day to 18 years.

### 19 Studies not reporting on AE

20  
21 There were 13 studies (10 RCT, 1 CCT, 2 single-arm experiments) that did not report if an AE occurred, or not, after  
22  
23 receiving MT. Of total 878, 436 children (0 to 18 years) received MT for various reasons including infantile colic,  
24  
25 childhood eczema, weight gain in preterm babies, soothing pain for heel stick, improving neurological diseases, and  
26  
27 helping urinary tract and HIV infection.

### 32 Reports of Adverse Events

33  
34 Of 60 included studies, 16 (26.6%) reported AE(s), 31 (51.6%) did not mention if an AE occurred or not, and 13 (21.6%)  
35  
36 reported that no AE occurred. Figure 1 illustrates the PRISMA flow diagram. Of 16 studies (n=438) reporting AEs, 13  
37  
38 were published in English, one in Russian, and two in French. In total, 11 different types of AEs occurred in 64  
39  
40 individuals. Of 16 studies reporting an AE, five did not state who performed the massage therapy. Of the 11 that reported,  
41  
42 MT was provided by trained nurses (n=2), parents/grandparents (n=1), paramedic personnel (n=1), nanny (n=1),  
43  
44 traditional massage practitioner (n=1), and trained massage practitioner (n=5). In some cases, a nurse or trained massage  
45  
46 practitioner started MT, and a parent continued the massage. None of the studies reported any AE associated with MT  
47  
48 when it was provided by a licensed or registered massage therapist.

### 51 Indirect Adverse Event

1 One publication identified an indirect AE, i.e., a delay in diagnosis and/or treatment. A case report documented four  
2 children with *Staphylococcus aureus* osteomyelitis, which presented as upper arm swelling.[44] The authors considered  
3 the use traditional MT for swelling a cause for delay in the diagnosis and treatment, leading to progression of the infection  
4 (Grade 3).  
5  
6  
7

## 8 **Risk of Bias Assessment**

9  
10  
11 Risk of bias was not assessed for two reasons: (i) the large majority of included studies (11 of 16) were case  
12 reports and case series, for which there is no universally accepted tool to assess bias; and (ii) with regards to RCTs,  
13 there is evidence that existing ROB tools are developed with efficacy as their main focus and that other factors  
14 should be considered for assessment of adverse events.[41] Until an appropriate tool is developed, we opt to not  
15 proceed with an assessment that may itself lead to bias. At present, there is no clear guidance on how to proceed  
16 with ROB assessment on studies reporting adverse events data.[37, 41, 45-48]  
17  
18  
19  
20  
21  
22  
23  
24  
25

## 26 **Studies not reporting on AE**

27  
28 There were 13 studies (10 RCT, 1 CCT, 2 single-arm experiments) not reporting if an AE occurred, or not, after receiving  
29 MT. Of total 878, 436 children (0 to 18 years) received MT for various reasons including infantile colic, childhood  
30 eczema, weight gain in preterm babies, soothing pain for heel stick, improving neurological diseases, urinary tract  
31 infection and HIV infection.  
32  
33  
34  
35  
36  
37  
38  
39

## 40 **Adverse Events and severity**

### 41 **Serious AE (Grades 4-5)**

42  
43  
44 Five included studies reported 18 cases of serious AEs after MT.[49-53]  
45

46 Seventeen preterm infants (15 females and two males) were diagnosed with intestinal volvulus without malrotation after  
47 abdominal massage. The MT were usually performed 4-8 times per day by nurses to stimulate peristalsis in preterm (27-  
48 31-week gestational age), and extremely preterm (>23.5 and <27 weeks gestational age) infants. The intestinal volvulus  
49 occurred from 13 days to 52 days after birth. Four infants died (Grade 5) and 13 survived after bowel resection surgery  
50  
51  
52  
53  
54  
55  
56  
57  
58  
59  
60

1 (Grade 4). A retrospective case control study done by Maas,[49] reports five extremely preterm infants (GA 24.4 weeks)  
2 with volvulus without malrotation. Each case was matched with five other preterm infants with similar birth weight, GA  
3 and birth year. Three of the five patients with volvulus died. Maas reports that MT was not found to be risk factor for the  
4 and birth year. Three of the five patients with volvulus died. Maas reports that MT was not found to be risk factor for the  
5 volvulus, as both cases and controls received massage similarly.  
6

7  
8 In addition, a serious AE also occurred in a 4-month old female who had status epilepticus due to camphor intoxication,  
9 following abdominal massage with camphor-containing lotion. She was hospitalized for 72 hours for uncontrolled  
10 seizures, where she was intubated, mechanically ventilated, and given seizure treatment (Grade 4) (Table 2).  
11  
12  
13  
14  
15  
16  
17  
18  
19  
20  
21  
22  
23  
24  
25  
26  
27  
28  
29  
30  
31  
32  
33  
34  
35  
36  
37  
38  
39  
40  
41  
42  
43  
44  
45  
46  
47  
48  
49  
50  
51  
52  
53  
54  
55  
56  
57  
58  
59  
60

**Table 2: Volvulus without malrotation in pediatric massage therapy (n=17)**

| First author (Year), location Study design                | Indication for treatment                              | AE Severity | n event /N population | Age/weight                        | Age at AE                                                | Gender     | Type of MT                                      | MT practitioner      | Outcome (Grade)                                        | Notes from study authors                                                                                                                                  |
|-----------------------------------------------------------|-------------------------------------------------------|-------------|-----------------------|-----------------------------------|----------------------------------------------------------|------------|-------------------------------------------------|----------------------|--------------------------------------------------------|-----------------------------------------------------------------------------------------------------------------------------------------------------------|
| Maas, C. (2014), Germany Case-control                     | To stimulate peristalsis in extremely preterm infants | VWM Severe  | 5/2                   | 23.6-25.4 weeks GA; 370-630 grams | 37-52 d after birth                                      | 5 F        | Abdominal massage 4-6 times/day                 | NS                   | 3 Died (Grade 5)<br>2 Survived after surgery (Grade 4) | Data did not support the hypothesis that abdominal massage was a risk factor for VWM; no further cases were diagnosed after the practice was discontinued |
| Zweifel, N. et al. (2013), Switzerland Case series        | To stimulate peristalsis in preterm infants           | VWM Severe  | 3/3                   | 27-31 weeks GA; 880 grams         | NS                                                       | 2 F<br>1 M | Repeated abdominal massage multiple times a day | Nurse                | 3 survived after surgery (Grade 4)                     | There may be a causal relationship between abdominal massage and VWM; no further cases were diagnosed after the practice was discontinued                 |
| Paraskevopoulos E. et al. (2006), Switzerland Case series | To stimulate peristalsis                              | VWM Severe  | 2/2                   | 27 weeks GA                       | At 19 <sup>th</sup> and 32 <sup>nd</sup> day after birth | 2 F        | Intensive abdominal massage every 3 hours       | Nurse                | 2 survived after surgery (Grade 4)                     | The infants had no other risk factors other than the abdominal massage; the practice was discontinued with no further cases since                         |
| Billimaz, K. (2001), France Case series                   | To stimulate peristalsis                              | VWM Severe  | 7/7                   | 27-29 weeks GA: 660-1100 grams    | Day 13-33                                                | 6 F<br>1 M | Abdominal massage                               | Health care provider | 1 died (Grade 5)<br>6 survived after surgery (Grade 4) | No new cases of VWM were seen after the practice was discontinued                                                                                         |

Footnote: AE: adverse event; MT: massage therapy; VWM: volvulus without malrotation; GA: gestational age; wk: week; NS: not stated; F: female; M: male.

**Moderate AEs (Grade 2-3)**

There was one non-randomized controlled trial (NRCT),[54] two case series[44, 55] and four case reports[32, 33, 56, 57] from 1994 to 2017 reporting on 27 children, aged from 1-day to 16 years old. Those children experienced moderate AEs including infant mastitis/abscess, osteomyelitis, popliteal artery pseudo-aneurysm, acute unilateral neurosensory hearing loss, scrotal hematoma, and oxygen desaturation. The NRCT[54] assessed physiological measurements including amplitude-integrated electroencephalography (aEEG), oxygen saturation (SaO<sub>2</sub>), pulse rate, and cerebral blood flow in 39 preterm infants following whole body Shantol (stroking and rubbing whole body) massage by a therapist and the mother. They reported four cases of oxygen desaturation (<85%) requiring withdrawal from the experiment (Grade 2); no further details were provided. One case series[55] described 15 cases of neonatal mastitis following repeated massage in 15 infants aged 6-48 days; all cases needed antibiotic therapy with or without abscess drainage (Grade 3). Three case reports of MT AE were also published: (i) a popliteal artery pseudo aneurysm after leg MT on an osteochondroma in a 16-year old male;[33] (ii) acute unilateral neurosensory hearing loss after MT on the neck and trapezius muscle in a 14-year old male diagnosed with autonomic nervous system dysfunction;[57] and (iii) scrotal hematoma after traditional MT with a warm sand bag on hydrocele of a 1-day old baby boy.[32] The first and third cases resolved after hospitalization and appropriate surgery and second case resolved after intensive treatment plan at a hospital for 15 days and at home for seven days (Grade 3) (Table 3).

**Table 3: Moderate to Severe adverse events in pediatric massage therapy (n=27)**

| First author (Year), location Study design          | Indication for treatment                                    | AE Severity                                                        | n event/N population                                           | Age                                                     | Time of AE                     | Gender     | Type of MT                                       | MT practitioner                           | Outcome (Grade)                                                                                         | Notes from study authors                                                                                                                                                                                                                       |
|-----------------------------------------------------|-------------------------------------------------------------|--------------------------------------------------------------------|----------------------------------------------------------------|---------------------------------------------------------|--------------------------------|------------|--------------------------------------------------|-------------------------------------------|---------------------------------------------------------------------------------------------------------|------------------------------------------------------------------------------------------------------------------------------------------------------------------------------------------------------------------------------------------------|
| Rudnicki, J. (2012), Poland CCT                     | Assessing the physiologic effects* of MT in preterm infants | Arterial oxygen desaturation <85%<br>Moderate                      | 4/39                                                           | 39 preterm infants, 22 <32 weeks GA and 17 ≥32 weeks GA | 18 days (n=17), 24 days (n=22) | 5 F        | Shantal (stroking and rubbing whole body)        | Therapist/ mother                         | Withdrawn from the study (Grade 2)                                                                      | No other information was given by the authors about management or resolution of this AE                                                                                                                                                        |
| Masoodi, T. (2014), India Case series               | Breast hypertrophy (12 mastitis and 20 abscess)             | Mastitis and breast abscesses<br>Moderate                          | 15/32 received MT to express secretions for breast hypertrophy | 6-48 days                                               | NS                             | NS         | Repeated breast massage                          | NS                                        | Resolved after antibiotic therapy/drainage of abscess (Grade 3)                                         | Massage for neonatal breast hypertrophy should not be performed                                                                                                                                                                                |
| Razafimahandry, H.J. (2007), Madagascar Case series | Upper arms osteomyelitis (Staphylococcus aureus)            | Severe infection due to delayed diagnosis (20-60 days)<br>Moderate | 4/4                                                            | 5-11 years                                              | NS                             | 2 F<br>2 M | Traditional massage                              | NS                                        | 3 cases resolved after hospitalization and antibiotic therapy (Grade 3)                                 | One case was a severely cachectic 11-year old boy diagnosed with pulmonary tuberculosis and died of septic shock five days later; no other details regarding his death was described                                                           |
| Guilbert J. et al. (2007), France Case series       | Flatulence                                                  | Status epilepticus<br>Severe                                       | 1/1                                                            | 4 months                                                | 72 hours                       | 1 F        | Abdominal massage with camphor-containing lotion | Caregiver                                 | Hospitalized, intubated, treated for status epilepticus (Grade 4)                                       | Other investigations were normal; the infant was extubated after three days and later discharged home with a normal neurological examination                                                                                                   |
| Kalinga, M.J. (1996), Singapore Case report         | Swelling of right thigh due to osteochondroma               | Popliteal artery pseudo-aneurysm<br>Moderate                       | 1/1                                                            | 16 years                                                | 3rd session of massage         | M          | MT with herbal medicine (5 sessions)             | Traditional Chinese Medicine practitioner | Resolved after hospitalization and surgery (Grade 3)                                                    | Diagnosis was right popliteal artery pseudo-aneurysm after the 5 <sup>th</sup> session of MT. At surgery femoral artery defect was found adjacent to the osteochondroma                                                                        |
| Medvedev, E. (1994), Russia Case report             | Autonomic nervous system dysfunction                        | Acute unilateral neurosensory hearing loss<br>Moderate             | 1/1                                                            | 14 years                                                | During treatment               | M          | Tonic MT of the neck including trapezius muscle  | NS                                        | Recovered with hospitalization; medications plus "5 sessions of TENS** for 8th cranial nerve" (Grade 3) | The boy with ANS dysfunction received MT and developed acute unilateral neurosensory hearing loss with noise. MT stimulated the ANS and caused vascular spasm leading to decreased blood flow to the cochlea and subsequent hearing impairment |
| Ram, S.P. (1994), Malaysia Case report              | Hydrocele                                                   | Scrotal hematoma<br>Moderate                                       | 1/1                                                            | 1 day                                                   | 1st day                        | M          | Traditional MT to testes with warm sand bag      | NS                                        | Resolved after surgery (Grade 3)                                                                        | None                                                                                                                                                                                                                                           |

---

Footnote: AE: adverse event; MT: massage therapy; CCT: controlled clinical trial (non-randomized controlled trial); GA: gestational age; NS: not stated; F: female; M: male; TENS: transcutaneous electrical nerve stimulation; ANS: autonomic nervous system.

---

1  
2  
3  
4  
5  
6  
7  
8  
9  
10  
11  
12  
13  
14  
15  
16  
17  
18  
19  
20  
21  
22  
23  
24  
25  
26  
27  
28  
29  
30  
31  
32  
33  
34  
35  
36  
37  
38  
39  
40  
41  
42  
43  
44  
45  
46  
47

**Mild AE (Grade 1)**

Two RCTs[58, 59] described skin rashes after whole body massage with various oils (almond, mineral, coconut, or safflower) examining the effects of MT on growth measurements (weight, height, etc.) in 17 infants with age from 1-day to 3-days old. These mild reactions occurred in 2.5% in the first[58] and 6% in the second[59] study populations; all resolved spontaneously without discontinuation of MT or the oils (Grade 1). Two almost identical RCTs[60, 61] examined the immunogenicity of mild rubbing massage on vaccination sites among 808 and 328 infants 2-6 months old, respectively. AEs included crying, anorexia, drowsiness, vomiting, irritability, fever, pain, redness, and induration; all were mild and did not need an intervention except general health advice for vaccinated children (Grade 1). Two single-arm experimental studies, one by Cullen et al.,[62] described mild hyperactivity (n=1) and the other by Beaver et al.,[63] reported increased blood pressure/heart rate and decreased transcutaneous oxygen saturation (n=8) following MT. One case report by Li et al.,[64] described a mild skin bruising after a MT technique involving pinching skin. All these interventions needed minimal intervention for resolution (Grade 1) (Table 4).

**Unclassified AEs**

Due to insufficient information, we were unable to properly assess and rate the severity of AE reported by a NRCT. Goncharov et al.,[65] assessed the effect of MT with a mixture of aromatic oils on CNS rehabilitation among 31 infants aged 4-18 months with perinatal hypoxic central nervous system (CNS) injury. One child (age and sex not provided) developed an “allergic reaction” (oil product not specified) and dropped out of the study (no further details were provided to allow for severity rating). The manuscript was written in Russian and author’s contact information was not available.



**Table 4: Mild adverse events in pediatric massage therapy (n=20)**

| First author (Year), location Design          | Indication for treatment                                             | AE Severity                           | n event /N population | Age      | Time of AE       | Gender       | Type of MT                                                     | MT practitioner           | Outcome (Grade)                                                  | Notes from study authors                                                                                                                                                                                                                                          |
|-----------------------------------------------|----------------------------------------------------------------------|---------------------------------------|-----------------------|----------|------------------|--------------|----------------------------------------------------------------|---------------------------|------------------------------------------------------------------|-------------------------------------------------------------------------------------------------------------------------------------------------------------------------------------------------------------------------------------------------------------------|
| Patel, GM (2017), USA Case-report             | Examining of MT for reflux                                           | Bruising and dry patches on face Mild | 1/1                   | 6 weeks  | 3 days after MT  | M            | Craniosacral massage                                           | Not reported              | No major complication (Grade 1)                                  | Vitamin K deficiency bleeding was confirmed after rapid elevation of International correction ratio (INR); the craniosacral massage therapy was the cause of his superficial bleeding                                                                             |
| Li, Z. (2015), China Case-report              | Repeated vomiting                                                    | Bruising Mild                         | 1/1                   | 5 years  | NS               | M            | Traditional Chinese massage therapy (Ba sha)                   | Grandmother/mother        | Bruising was mild (Grade 1); (patient died due to strangulation) | An incidental case with multiple bruises over the chest, neck, and shoulders resulting from traditional Chinese MT (ba sha), involving pinching the skin between thumb and index finger, for vomiting. Injuries resulting from ba sha were not the cause of death |
| Solanki, K. (2005), India RCT                 | Examining MT with oil on growth and fatty acid profile of the infant | skin rash Mild                        | 3/118                 | 1-3 days | 3rd and 4th days | 47 F<br>71 M | Massage with safflower oil for 10 min, 4 times/day over 5 days | Trained massager          | Resolved spontaneously (Grade 1)                                 | The rash resolved without treatment in 1-2 days despite continuing the oil massage                                                                                                                                                                                |
| Sankaranarayanan, K. (2005), India RCT        | Examining MT with oil on weight and growth and AE                    | skin rash Mild                        | 14/22<br>4            | 2 days   | NS               | NS           | Massage 5 minutes 4/day with coconut/mineral oil or no oil     | Trained person and mother | Resolved spontaneously (Grade 1)                                 | Massage in hospital and home continued for 30 days; mild rash occurred equally in all groups, coconut oil (n=5), mineral oil (n=5), and placebo (n=4), and did not require discontinuation of massage                                                             |
| Cullen, L.A. (2005), UK Single-arm experiment | Examining MT on communication of autistic child                      | Worsened hyperactivity Mild           | 1/15                  | NS       | After 24 hours   | M            | 1-hour weekly MT for 8 times by massager and daily by parent   | Therapist and parents     | No major complication (Grade 1)                                  | Eight other participants (2-13 years old, all with autism) who completed the study over eight weeks reported "no obvious negatives"                                                                                                                               |

Footnote: AE: adverse event; RCT: randomized controlled trial; MT: massage therapy; NS: not stated; F: female; M: male.

## DISCUSSION

To the best of our knowledge, this is the first systematic review to primarily assess AEs associated with pediatric MT.

After extensive search in multiple databases and including non-English studies we identified 64 adverse events associated with pediatric massage. These events were further classified in mild, moderate and severe by our team. Moderate events were the most frequently identified, closely followed by mild and severe adverse events. Of serious AE identified, abdominal massage to stimulate peristalsis in preterm infants was identified as been associated with multiple reports of volvulus without malrotation.

Volvulus without malrotation (VWM) is considered a rare event, often associated with preterm birth (<30 weeks GA) and low birth weight (<1000 g)[49, 50, 52, 66-69] We identified 17 events of volvulus without malrotation in preterm infants on this review, mostly very low birth weight (VLBW). In five VWM, the authors did not consider MT as a risk factor for the volvulus while for the remaining 12 events, MT was considered a risk factor by authors.[49] The identified cases of VWM led to a routine change in their centers to avoid abdominal massage in preterm infants due the risk of volvulus. All the authors report that changing their practice to avoid abdominal massage in preterm neonates generated no further events of VWM in their centers.[49] The large majority of the events reported in this review occurred in infants born at <30 weeks GA and weighted <1000g, which may be a confounder, since VLBW is consider a risk factor for VWM. Others have reported findings of VWM in preterm infants. Horsch has reviewed cases of volvulus in surgical referral center over 8 years in Germany and found 3 preterm infants with VWM, of these, 1 received properistaltic abdominal massage.[70] Yarkin after reviewing 2 years of data from an epidemiological survey identified that 12 of 15 cases of low birth weight (<1500g) pre term infants with VWM had abdominal massages prior to the event, although due the uncontrolled study design they were unable to determine abdominal massage as a direct risk factor.[71] Horsch and Yarkin were not included this review because they did not look into MT specifically. Several authors[49, 70, 72, 73] have speculated on other risk factors for VWM, including immaturity of the intestine resulting in

1 prolonged transit times and stool retention, use of continuous positive airway pressure (CPAP) or other intensive respiratory support, and female gender. Several  
2 of these risk factors were also identified in the included reports and it makes difficult to assure causality of MT in the development of VWM.  
3  
4 Massage therapy has been studied in children, but with the main focus of assessing efficacy, very little has been reported on adverse events.[18-21, 24-30] In  
5  
6 contrast, adults report a wide range of adverse events associated with massage, from mild events to severe, including: cerebrovascular accidents,  
7  
8 thromboembolism (renal, pulmonary), skin injury, leg ulcer, genitourinary injuries disc herniation, soft tissue trauma, neurologic compromise, spinal cord injury,  
9  
10 dissection of the vertebral arteries”. [8, 34, 35] Although, it is difficult to compare the different populations and co-morbidities associated with each.  
11  
12 Similar to other studies,[74] this review reveals a lack of adverse events reporting. The majority of included studies did not report if the intervention was  
13  
14 associated with any adverse event or not, leading to significant reporting bias from the primary studies and carried into the review level, confirming the true  
15  
16 magnitude of adverse events related to massage in pediatrics remains unknown.  
17  
18  
19  
20

## 21 Strengths and limitation

22  
23 This review was inclusive in searching peer-reviewed publications in seven databases from inception onwards, not limiting by language. We minimized  
24  
25 subjective errors by independent duplicate screening, study selection, and data extraction. This SR meticulously collected data from included studies and  
26  
27 classified severities of AEs according to well-established criteria. We have incorporated to this review all relevant studies, including case reports, case series, and  
28  
29 clinical trials in an effort to be comprehensive. In addition, we reported studies that reported if AEs occurred or not, whether they mentioned if AEs were assessed  
30  
31 or not, except for case reports which were only included if an event was reported.  
32  
33

34 As any study, this review has limitations. The majority of the AEs, were described in case series/reports. Although case studies are well-recognized sources of  
35  
36 reports on severe, unusual, and/or rare AEs, conclusions drawn from such sources are limited and subject t of confounding factors. Additionally, given the limited  
37  
38  
39  
40  
41  
42  
43  
44

1 information and heterogeneity of the data reported in the included studies, it was not possible to identify any conclusive association between MT and specific  
2 AEs, except for ba sha massage which caused a characteristic bruising.  
3

4 Risk of bias was not performed due the nature of included studies.  
5  
6  
7

8 Clinical relevance of review findings:  
9

10 The most significant review finding warranting clinical surveillance is the association between abdominal massage and VWM in pre term infants. There are  
11 several confounder s impeding this review to define a causal relationship between neonatal abdominal massage and VWM, but the reports should be taken into  
12 careful consideration and abdominal massage should be consider with caution on this population.  
13  
14  
15  
16  
17  
18

## 19 **CONCLUSIONS**

20  
21 We were able to identify a range of AEs associated with MT use, from mild to severe. Unfortunately, the majority of included studies did not report if an adverse  
22 event occurred or not, leading to publication bias. This review reports an association between abdominal massage with volvulus without malrotation in preterm  
23 infants, it is still to be defined if this is casual or not, but our findings warrant caution in the use of abdominal massage in pre term infants.  
24  
25  
26

## 27 **Acknowledgements**

28  
29  
30 We thank Susanne King-Jones for searching databases, library support and reviewing the manuscript; Katherine Smith, Sheena Sikora, Kerri Gladwin, Maleka  
31 Ramji, and Namrata Hansraj for screening; Samaneh Khanpour Ardestani, Susanne King-Jones, Tatiana Kryuchkova, Natalia Liapounova, Melissa Morelli-  
32 Lacroix, Derek Wang, Amy Wolgemuth, Hai Chuan Yu, and Liliane Zorzela for translation of non-English papers. We thank Denise Adams for her contributions  
33  
34  
35 to the early development of this work.  
36  
37  
38  
39  
40  
41  
42  
43  
44  
45  
46  
47

**References:**

1. National Institutes of Health. Exploring the Science of Complementary and Integrative Health. National Center for Complementary and Integrative Health 2016 Strategic Plan [Internet]. 2016.
2. Health Canada. Complementary and Alternative Health Care: The Other Mainstream? Health Policy Research Bulletin [Internet]. 2003; (7):[1-48 pp.]. Available from: <http://www.hc-sc.gc.ca/sr-sr/pubs/hpr-rpms/bull/2003-7-complement/index-eng.php>.
3. The College of Massage Therapists of Ontario. About Massage Therapy 2019 [July 2019]. Available from: <https://www.cmto.com/about-the-profession/about-massage-therapy/>.
4. The College of Massage Therapists of Ontario. About Massage Therapists in Ontario 2019 [July 2019]. Available from: <https://www.cmto.com/about-the-profession/>.
5. National Institutes of Health. Massage Therapy: An Introduction. National Center for Complementary and Integrative Health 2016 Strategic Plan [Internet]. 2016. Available from: <https://nccih.nih.gov/health/massage/massageintroduction.htm>.
6. National Institutes of Health. rMassage Therapy for Health Purposes. National Center for Complementary and Integrative Health 2016 Strategic Plan [Internet]. 2016. Available from: <https://nccih.nih.gov/health/massage/massageintroduction.htm>.
7. Sagar S, Dryden T, Wong RK. Massage therapy for cancer patients: a reciprocal relationship between body and mind. *Current oncology*. 2007;14(2).
8. Ernst E. The safety of massage therapy. *Rheumatology*. 2003;42(9):1101-6.
9. National Institutes of Health. The use of Complementary and Alternative Medicine in the United States. National Center for Complementary and Integrative Health 2016 Strategic Plan [Internet]. 2007. Available from: [https://nccih.nih.gov/research/statistics/2007/camsurvey\\_fs1.htm](https://nccih.nih.gov/research/statistics/2007/camsurvey_fs1.htm).
10. Adams D, Dagenais S, Clifford T, et al. Complementary and alternative medicine use by pediatric specialty outpatients. *Pediatrics*. 2013;131(2):225-32.
11. Revuelta-Iniesta R, Wilson ML, White K, et al. Complementary and alternative medicine usage in Scottish children and adolescents during cancer treatment. *Complement Ther Clin Pract*. 2014;20(4):197-202.
12. Adams D, Schiffgen M, Kundu A, et al. Patterns of utilization of complementary and alternative medicine in 2 pediatric gastroenterology clinics. *J Pediatr Gastroenterol Nutr*. 2014;59(3):334-9.
13. Galicia-Connolly E, Adams D, Bateman J, et al. CAM use in pediatric neurology: an exploration of concurrent use with conventional medicine. *PLoS One*. 2014;9(4):e94078.
14. Richmond E, Adams D, Dagenais S, et al. Complementary and alternative medicine: A survey of its use in children with chronic respiratory illness. *Can J Respir Ther*. 2014;50(1):27-32.
15. Field T. Pediatric Massage Therapy Research: A Narrative Review. *Children*. 2019;6(6):78.
16. Guan L, Collet JP, Yuskiv N, et al. The effect of massage therapy on autonomic activity in critically ill children. *Evid Based Complement Alternat Med*. 2014;2014:656750.
17. Nelson NL. Massage therapy: understanding the mechanisms of action on blood pressure. A scoping review. *J Am Soc Hypertens*. 2015;9(10):785-93.
18. Field TM. Massage therapy effects. *American Psychologist*. 1998;53(12):1270-81.
19. Bennett C, Underdown A, Barlow J. Massage for promoting mental and physical health in typically developing infants under the age of six months. *The Cochrane database of systematic reviews*. 2013;4:CD005038.
20. Field T, Diego M, Hernandez-Reif M. Preterm Infant Massage Therapy Research: A Review. *Infant behavior & development*. 2010;33(2):115-24.
21. Beider S, Moyer CA. Randomized Controlled Trials of Pediatric Massage: A Review. *Evidence-based Complementary and Alternative Medicine*. 2007;4(1):23-34.
22. Shin ES, Seo KH, Lee SH, et al. Massage with or without aromatherapy for symptom relief in people with cancer. *Cochrane Database Syst Rev*. 2016(6):Cd009873.
23. Tsao JCI, Zeltzer LK. Complementary and Alternative Medicine Approaches for Pediatric Pain: A Review of the State-of-the-science. *Evidence-based Complementary and Alternative Medicine*. 2005;2(2):149-59.
24. Juneau AL, Aita M, Heon M. Review and Critical Analysis of Massage Studies for Term and Preterm Infants.

Neonatal Netw. 2015;34(3):165-77.

25. Shipwright S, Dryden T. Paediatric massage: an overview of the evidence. Focus on Alternative and Complementary Therapies. 2012;17(2):103-10.
26. Kulkarni A, Kaushik JS, Gupta P, et al. Massage and touch therapy in neonates: the current evidence. Indian pediatrics. 2010;47(9):771.
27. Ireland M, Olson M. Massage therapy and therapeutic touch in children: state of the science. Altern Ther Health Med. 2000;6(5):54-63.
28. Field T. Massage therapy for infants and children. Journal of Developmental & Behavioral Pediatrics. 1995;16(2):105-11.
29. Moyer CA, Seefeldt L, Mann ES, et al. Does massage therapy reduce cortisol? A comprehensive quantitative review. J Bodyw Mov Ther. 2011;15(1):3-14.
30. Li X, Zhong Q, Tang L. A Meta-Analysis of the Efficacy and Safety of Using Oil Massage to Promote Infant Growth. Journal of Pediatric Nursing: Nursing Care of Children and Families. 2016;31(5):e313-e22.
31. Ernst E. Serious adverse effects of unconventional therapies for children and adolescents: a systematic review of recent evidence. European Journal of Pediatrics. 2003;162(2):72-80.
32. Ram SP, Kyaw K, Noor AR. Haematoma testes due to traditional massage in a neonate. Trop Doct. 1994;24(2):81-2.
33. Kalinga MJ, Lo NN, Tan SK. Popliteal artery pseudoaneurysm caused by an osteochondroma--a traditional medicine massage sequelae. Singapore Med J. 1996;37(4):443-5.
34. Posadzki P, Ernst E. The safety of massage therapy: an update of a systematic review. Focus on Alternative and Complementary Therapies. 2013;18(1):27-32.
35. Yin P, Gao N, Wu J, et al. Adverse Events of Massage Therapy in Pain-Related Conditions: A Systematic Review. Evidence-Based Complementary and Alternative Medicine. 2014;2014:11.
36. Ernst E, Barnes J. Methodological approaches to investigating the safety of complementary medicine. Complementary Therapies in Medicine. 1998;6(3):115-21.
37. Chou R, Aronson N, Atkins D, et al. AHRQ series paper 4: assessing harms when comparing medical interventions: AHRQ and the effective health-care program. J Clin Epidemiol. 2010;63(5):502-12.
38. Zorzela L, Loke YK, Ioannidis JP, et al. PRISMA harms checklist: improving harms reporting in systematic reviews. BMJ. 2016;352:i157.
39. Moher D, Liberati A, Tetzlaff J, et al. Preferred reporting items for systematic reviews and meta-analyses: the PRISMA statement. International journal of surgery (London, England). 2010;8(5):336-41.
40. Golder S, Loke YK. Search strategies to identify information on adverse effects: a systematic review. Journal of the Medical Library Association. 2009;97(2):84.
41. Higgins JPT, Thomas J, Chandler J, et al. Cochrane Handbook on Systematic Reviews of Interventions version 6.0. available from [www.training.cochrane.org/handbook](http://www.training.cochrane.org/handbook). 2019.
42. CTCAE. Common Terminology Criteria for Adverse Events; Version 4. US Department of Health and Human Services, National Institute of Health, National Cancer Institute; 2010.
43. Zorzela L, Mior S, Boon H, et al. Tool to assess causality of direct and indirect adverse events associated with therapeutic interventions. Curr Med Res Opin. 2018;34(3):407-14.
44. Razafimahandry HJC, Rakoto-Ratsimba HN, Rakotoarisoa B, et al. Special features of humeral osteomyelitis in four children in Madagascar France: Institut de Medecine Tropicale; 2007 [cited 67 3]. 275].
45. Ioannidis JP, Evans SJ, Gøtzsche PC, et al. Better reporting of harms in randomized trials: an extension of the CONSORT statement. Annals of internal medicine. 2004;141(10):781-8.
46. Edwards IR, Aronson JK. Adverse drug reactions: definitions, diagnosis, and management. Lancet. 2000;356(9237):1255-9.
47. Ioannidis JP, Lau J. Completeness of safety reporting in randomized trials: an evaluation of 7 medical areas. Jama. 2001;285(4):437-43.
48. Loke YK, Derry S. Reporting of adverse drug reactions in randomised controlled trials - a systematic survey. BMC Clin Pharmacol. 2001;1:3.
49. Maas C, Hammer S, Kirschner HJ, et al. Late-onset volvulus without malrotation in extremely preterm infants--a

case-control-study. *BMC Pediatrics*. 2014;14:287.

- 1 50. Zweifel N, Meuli M, Subotic U, et al. Manufactured volvulus. *Eur J Pediatr Surg*. 2013;23(3):234-7.
- 2 51. Paraskevopoulos E. AR. Volvulus in two preterm infants: abdominal massage as a risk factor? *Swiss Society of*
- 3 *Neonatology*. 2006:1-10.
- 4 52. Billiemaz K, Varlet F, Patural H, et al. Intestinal volvulus in extremely premature infants. *Arch Pediatr*.
- 5 *2001;8(11):1181-4*.
- 6 53. Guilbert J, Flamant C, Hallalel F, et al. Anti-flatulence treatment and status epilepticus: a case of camphor
- 7 intoxication. *Emergency Medicine Journal*. 2007;24(12):859.
- 8 54. Rudnicki J, Boberski M, Butrymowicz E, et al. Recording of amplitude-integrated electroencephalography,
- 9 oxygen saturation, pulse rate, and cerebral blood flow during massage of premature infants. *Am J Perinatol*.
- 10 *2012;29(7):561-6*.
- 11 55. Masoodi T, Mufti GN, Bhat JI, et al. Neonatal mastitis: a clinico-microbiological study. *Journal of Neonatal*
- 12 *Surgery*. 2014;3(1):2.
- 13 56. Patel Gera M, Haynes A. Case 6: Bruising and Bleeding in a 6-week-old Boy. *Pediatr Rev*. 2017;38(3):144.
- 14 57. Medvedev EA. Case of acute unilateral neurosensory hearing loss caused by massage of the trapezius muscle.
- 15 *Vestn Otorinolaringol*. 1994(3):38-9.
- 16 58. Solanki K, Matnani M, Kale M, et al. Transcutaneous absorption of topically massaged oil in neonates. *Indian*
- 17 *pediatrics*. 2005;42(10):998.
- 18 59. Sankaranarayanan K, Mondkar JA, Chauhan MM, et al. Oil massage in neonates: an open randomized controlled
- 19 study of coconut versus mineral oil. *Indian pediatrics*. 2005;42(9):877.
- 20 60. Huang FY, Huang LM. Effect of local massage on vaccination: DTP and DTPa. *Acta Paediatrica Taiwanica*.
- 21 *1999;40(3):166*.
- 22 61. Hsu CY, Huang LM, Lee CY, et al. Local massage after vaccination enhances the immunogenicity of diphtheria-
- 23 tetanus-pertussis vaccine. *Pediatr Infect Dis J*. 1995;14(7):567-72.
- 24 62. Cullen LA, Barlow JH, Cushway D. Positive touch, the implications for parents and their children with autism: an
- 25 exploratory study. *Complement Ther Clin Pract*. 2005;11(3):182-9.
- 26 63. Beaver PK. Premature infants' response to touch and pain: can nurses make a difference? *Neonatal Netw*.
- 27 *1987;6(3):13-7*.
- 28 64. Li Z, Huan Z, Byard RW. Bruising caused by traditional Chinese massage therapy (ba sha) complicating the
- 29 assessment of a case of fatal child abuse. *Journal of Forensic and Legal Medicine*. 2015;36:49.
- 30 65. Goncharov OV. Massage with aromatic oils in complex rehabilitation of children with aftereffects of perinatal
- 31 hypoxic lesions of the central nervous system Russian Federation2007 [2]. 18]. Available from:
- 32 <http://ovidsp.ovid.com/ovidweb.cgi?T=JS&PAGE=reference&D=emed8&NEWS=N&AN=17566172>.
- 33 66. Yarkin Y, Maas C, Franz AR, et al. Epidemiological study on intestinal volvulus without malrotation in VLBW
- 34 infants. *Arch Dis Child Fetal Neonatal Ed*. 2019;104(4):F415-f8.
- 35 67. Mark S, Schlößer R, Gfroerer S, et al. Verfall des Allgemeinzustands eines Frühgeborenen. *Monatsschrift*
- 36 *Kinderheilkunde*. 2013;161(4):296-8.
- 37 68. Raherison R, Grosos C, Lemale J, et al. [Prenatal intestinal volvulus: A life-threatening event with good long-term
- 38 outcome]. *Arch Pediatr*. 2012;19(4):361-7.
- 39 69. Drewett M, Burge DM. Late-onset volvulus without malrotation in preterm infants. *J Pediatr Surg*.
- 40 *2009;44(2):358-61*.
- 41 70. Horsch S, Albayrak B, Trobs RB, et al. Volvulus in term and preterm infants - clinical presentation and outcome.
- 42 *Acta Paediatr*. 2016;105(6):623-7.
- 43 71. Yarkin Y, Maas C, Franz AR, et al. Epidemiological study on intestinal volvulus without malrotation in VLBW
- 44 infants. *Arch Dis Child Fetal Neonatal Ed*. 2018.
- 45 72. Berseth CL. Gestational evolution of small intestine motility in preterm and term infants. *The Journal of*
- 46 *Pediatrics*. 1989;115(4):646-51.
- 47 73. Kargl S, Wagner O, Pumberger W. Volvulus without malposition—a single-center experience. *Journal of Surgical*
- 48 *Research*. 2015;193(1):295-9.
- 49 74. Anderson M, Choonara I. A systematic review of safety monitoring and drug toxicity in published randomised
- 50
- 51
- 52
- 53
- 54
- 55
- 56
- 57
- 58
- 59
- 60

controlled trials of antiepileptic drugs in children over a 10-year period. Arch Dis Child. 2010;95(9):731-8.

1  
2  
3  
4  
5  
6  
7  
8  
9  
10  
11  
12  
13  
14  
15  
16  
17  
18  
19  
20  
21  
22  
23  
24  
25  
26  
27  
28  
29  
30  
31  
32  
33  
34  
35  
36  
37  
38  
39  
40  
41  
42  
43  
44  
45  
46  
47  
48  
49  
50  
51  
52  
53  
54  
55  
56  
57  
58  
59  
60



**Figure 1: PRISMA diagram for systematic review of pediatric massage therapy adverse events (AE)**

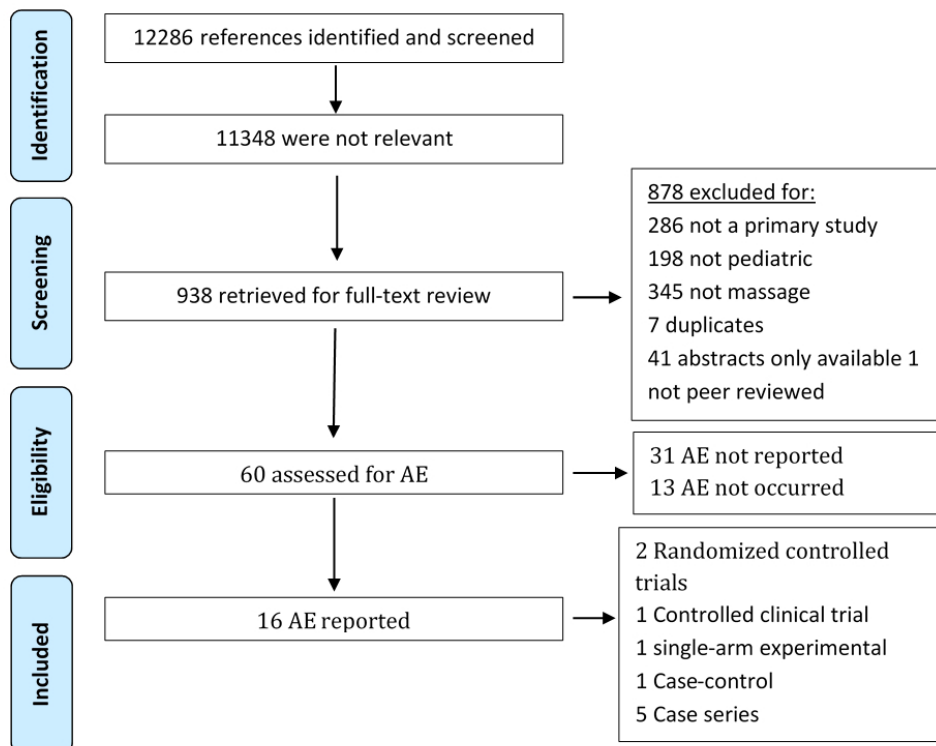

**Appendix: Medline search strategy for pediatric massage therapy adverse events**

1. abhyanga.tw.
2. acupressure.tw.
3. acupressure/
4. Amma.tw.
5. Anma.tw.
6. Anmo.tw.
7. Aromatherapy massage.tw.
8. ashiatsu oriental bar therap\$.tw.
9. aston pattern\$.tw.
10. augmented soft tissue mobilization.tw.
11. augmented soft-tissue mobilization.tw.
12. balinese massage.tw.
13. belavi facelift massage.tw.
14. bindegewebsmassage.tw.
15. bindegewebs massage.tw.
16. bodywork.tw.
17. (bowen adj1 (therap\$ or technique or work)).mp. [mp=ti, ot, ab, nm, hw]
18. budzek medical massage.tw.
19. chih ya.tw.
20. classical massage.tw.
21. connective tissue massage.tw.
22. (craniosacral adj1 (massage or therap\$)).tw.
23. deep-tissue massage.tw.
24. deep tissue massage.tw.
25. Esalen.mp. [mp=ti, ot, ab, nm, hw]
26. foot reflexion massage.tw.
27. four-hand massage.tw.
28. generic massage.tw.
29. hellerwork.tw.
30. hoshino therap\$.tw.
31. hot stone massage.tw.
32. huna kane.tw.
33. ice massage.tw.
34. ingham method.tw.
35. jamu.tw.

- 1
- 2
- 3
- 4 36. Jin Shin Do.tw.
- 5 37. korean martial therap\$.tw.
- 6 38. lomilomi.tw.
- 7 39. looyen work.tw.
- 8 40. Lymphatic drainage.tw.
- 9 41. lypposage.tw.
- 10 42. manual lymph drainage.tw.
- 11 43. manual stimulat\$.tw.
- 12 44. marma massage.tw.
- 13 45. exp massage/
- 14 46. massage.tw.
- 15 47. massotherapy.tw.
- 16 48. medical massage.tw.
- 17 49. Meridian massage.tw.
- 18 50. muscle energy technique\$.tw.
- 19 51. (myofascial adj1 (mobilization or release)).tw.
- 20 52. Myomassolog\$.tw.
- 21 53. myopathic muscular therap\$.tw.
- 22 54. Myotherap\$.tw.
- 23 55. naprapath\$.tw.
- 24 56. (neuromuscular adj1 (facilitat\$ or therap\$ or technique\$ or massage)).tw.
- 25 57. nuad bo rarn.tw.
- 26 58. nuat thai.tw.
- 27 59. oil massage.tw.
- 28 60. onsen technique.tw.
- 29 61. oncology massage.tw.
- 30 62. oriental bodywork.tw.
- 31 63. orthopedic massage.tw.
- 32 64. pfrimmer deep muscle therap\$.tw.
- 33 65. \*physical stimulation/
- 34 66. physical stimulat\$.tw.
- 35 67. phytotherapy.tw.
- 36 68. point holding.tw.
- 37 69. process accupressure.tw.
- 38 70. rebalancing.tw.
- 39 71. reflex zone massage.tw.
- 40 72. reflexognosy.tw.
- 41
- 42
- 43
- 44
- 45
- 46
- 47
- 48
- 49
- 50
- 51
- 52
- 53
- 54
- 55
- 56
- 57
- 58
- 59
- 60

- 1  
2  
3  
4  
5  
6  
7  
8  
9  
10  
11  
12  
13  
14  
15  
16  
17  
18  
19  
20  
21  
22  
23  
24  
25  
26  
27  
28  
29  
30  
31  
32  
33  
34  
35  
36  
37  
38  
39  
40  
41  
42  
43  
44  
45  
46  
47  
48  
49  
50  
51  
52  
53  
54  
55  
56  
57  
58  
59  
60
73. reflexology.tw.
  74. reposturing dynamics.tw.
  75. rolfing.tw.
  76. (Rosen adj1 (method\$ or massage)).tw.
  77. russian massage.tw.
  78. Shiatsu.tw.
  79. shiatzu.tw.
  80. exp shiatzu/
  81. (soft tissue adj1 (manipulat\$ or mobilizat\$ or release)).tw.
  82. sport\$ massage.tw.
  83. (strain-counterstrain adj1 (therap\$ or massage or technique)).tw.
  84. structural integrat\$.tw.
  85. swedish massage.tw.
  86. tactile stimulat\$.tw.
  87. thai massage.tw.
  88. tibetan massage.tw.
  89. tibetan point holding.tw.
  90. (trager adj1 (approach or technique or therap\$ or massage)).tw.
  91. triggerpoint massage.tw.
  92. Tuina.tw.
  93. tui na.tw.
  94. zero balanc\$.tw.
  95. zhi ya.tw.
  96. zhiya.tw.
  97. zone therap\$.tw.
  98. or/1-97
  99. (exp massage/ or massage.tw.) adj3 (carotid body/ or exp carotid arteries/ or carotid.tw. or heart.tw. or cardiac.tw. or sinus.tw. or uterine.tw. or udder.tw. or prostatic.tw. or prostate.tw. or cornea.tw. or ocular.tw. or intraocular pressure/ or glaucoma/ or decubitus ulcer.mp. or vagal.mp.)
  100. 98 not 99
  101. (ae or co or et).fs.
  102. ((Side or Advers\$) adj3 (effect\$ or affect\$ or reaction\$ or event\$)).tw.
  103. (risk\$ or harm\$ or aetiology\$ or etiolog\$ or cause or causation or causing or causal\$ or complicat\$).tw.
  104. exp risk/
  105. (risk-benefit adj5 (analy\$ or ratio\$ or assess\$)).mp.
  106. exp causality/

- 1  
2  
3  
4 107. significant event.tw.  
5 108. exp Safety/  
6 109. safe\$.tw.  
7  
8 110. aggravation\$.tw.  
9  
10 111. consequences.tw.  
11 112. injury.tw.  
12 113. exp "Wounds and Injuries"/  
13  
14 114. case report\$.tw.  
15 115. or/101-114  
16 116. anemia.tw.  
17  
18 117. bruising.tw.  
19 118. exp Hematoma/ or exp Purpura/ or exp Contusions/ or exp Hemorrhage/ or exp Ecchymosis/  
20 119. bruise.tw.  
21  
22 120. carotid artery stenosis.tw.  
23  
24 121. exp Dislocations/  
25 122. dilocation\$.tw.  
26  
27 123. exp Hearing Loss/  
28 124. hearing loss.tw.  
29  
30 125. hearing deterioration.tw.  
31 126. abscess.tw.  
32 127. abscess/  
33  
34 128. displacement of stent.tw.  
35 129. stent displacement.tw.  
36  
37 130. eczema.tw.  
38 131. eczema/  
39  
40 132. embolization.tw.  
41 133. exp Embolization, Therapeutic/ or exp Pulmonary Embolism/  
42 134. fetal haemorrhage.tw.  
43  
44 135. fracture.tw.  
45 136. fracture/  
46  
47 137. haematoma.tw.  
48 138. hematoma.tw.  
49  
50 139. infection.tw.  
51 140. nerve damage.tw.  
52  
53 141. pain.tw.  
54 142. exp Pain/  
55  
56 143. posterior interosseous syndrome.tw.  
57  
58  
59  
60

- 1  
2  
3  
4 144. pseudoaneurysm.tw.  
5 145. exp Aneurysm, False/  
6 146. exp Pulmonary Embolism/  
7  
8 147. ruptured colon.tw.  
9  
10 148. ruptured uterus.tw.  
11 149. swell\$.tw.  
12 150. strangulation.tw.  
13  
14 151. exp Asphyxia/ or exp Neck Injuries/  
15 152. exp Thyrotoxicosis/  
16 153. thyrotoxicosis.tw.  
17  
18 154. ulceration.tw.  
19 155. exp Ulcer/  
20 156. weak\$.tw.  
21  
22 157. or/116-156  
23  
24 158. 115 or 157  
25 159. exp infant, newborn/  
26 160. infant/  
27  
28 161. exp child, preschool/  
29 162. child/  
30  
31 163. exp puberty/  
32 164. minors/  
33  
34 165. adolescent/  
35 166. (newborn\$ or new-born\$ or infan\$ or baby\$ or babies\$ or preemie\$ or prematur\$).tw.  
36 167. toddler\$.tw.  
37  
38 168. (preschool\$ or pre-school\$).tw.  
39 169. nursery school\$.tw.  
40  
41 170. (kindergarten\$ or kindergarden\$).tw.  
42 171. (child\$ or kid or kids or boy\$ or girl\$).tw.  
43 172. elementary school\$.tw.  
44 173. (schoolchild\$ or "school child\$").tw.  
45 174. (schoolage\$ or school age\$).tw.  
46 175. ("junior high\$" or "middle school\$").tw.  
47 176. youth\$.tw.  
48 177. (teen\$ or adolescen\$ or juvenil\$ or "young adult\$" or pubert\$ or underage\$ or "under age\$").tw.  
49 178. (pubescen\$ or pre-pubescen\$ or prepubescen\$ or post-pubescen\$ or postpubescen\$).tw.  
50 179. secondary school\$.tw.  
51 180. (high school\$ or highschool\$).tw.  
52  
53  
54  
55  
56  
57  
58  
59  
60

1  
2  
3  
4  
5  
6  
7  
8  
9  
10  
11  
12  
13  
14  
15  
16  
17  
18  
19  
20  
21  
22  
23  
24  
25  
26  
27  
28  
29  
30  
31  
32  
33  
34  
35  
36  
37  
38  
39  
40  
41  
42  
43  
44  
45  
46  
47  
48  
49  
50  
51  
52  
53  
54  
55  
56  
57  
58  
59  
60

181. exp Pediatrics/  
182. pediatric\$.tw.  
183. paediatric.tw.  
184. or/159-183  
185. 100 and 158 and 184

Confidential: For Review Only
