# Supplementary material for: Adverse events associated with paediatric massage therapy: a systematic review
Source: PubMed Central journal article supplement — BMJ Paediatr Open. 2020 Aug 20;4(1):e000584. doi: 10.1136/bmjpo-2019-000584 (PMC7443277; doi:10.1136/bmjpo-2019-000584), 2020-08-20
Supplement: bmjpo-2019-000584supp001.pdf [file bmjpo-2019-000584supp001.pdf]

**Appendix: Medline search strategy for pediatric massage therapy adverse events**

1. abhyanga.tw.
2. acupressure.tw.
3. acupressure/
4. Amma.tw.
5. Anma.tw.
6. Anmo.tw.
7. Aromatherapy massage.tw.
8. ashiatsu oriental bar therap\$.tw.
9. aston pattern\$.tw.
10. augmented soft tissue mobilization.tw.
11. augmented soft-tissue mobilization.tw.
12. balinese massage.tw.
13. belavi facelift massage.tw.
14. bindegewebsmassage.tw.
15. bindegewebs massage.tw.
16. bodywork.tw.
17. (bowen adj1 (therap\$ or technique or work)).mp. [mp=ti, ot, ab, nm, hw]
18. budzek medical massage.tw.
19. chih ya.tw.
20. classical massage.tw.
21. connective tissue massage.tw.
22. (craniosacral adj1 (massage or therap\$)).tw.
23. deep-tissue massage.tw.
24. deep tissue massage.tw.
25. Esalen.mp. [mp=ti, ot, ab, nm, hw]
26. foot reflexion massage.tw.
27. four-hand massage.tw.
28. generic massage.tw.
29. hellerwork.tw.
30. hoshino therap\$.tw.
31. hot stone massage.tw.
32. huna kane.tw.
33. ice massage.tw.
34. ingham method.tw.
35. jamu.tw.
36. Jin Shin Do.tw.
37. korean martial therap\$.tw.
38. lomilomi.tw.
39. looyen work.tw.
40. Lymphatic drainage.tw.
41. lypposage.tw.
42. manual lymph drainage.tw.
43. manual stimulat\$.tw.
44. marma massage.tw.
45. exp massage/
46. massage.tw.
47. massotherapy.tw.
48. medical massage.tw.
49. Meridian massage.tw.
50. muscle energy technique\$.tw.

51. (myofascial adj1 (mobilization or release)).tw.
52. Myomassolog\$.tw.
53. myopathic muscular therap\$.tw.
54. Myotherap\$.tw.
55. naprapath\$.tw.
56. (neuromuscular adj1 (facilitat\$ or therap\$ or technique\$ or massage)).tw.
57. nuad bo rarn.tw.
58. nuat thai.tw.
59. oil massage.tw.
60. onsen technique.tw.
61. oncology massage.tw.
62. oriental bodywork.tw.
63. orthopedic massage.tw.
64. pfrimmer deep muscle therap\$.tw.
65. \*physical stimulation/
66. physical stimulat\$.tw.
67. phytotherapy.tw.
68. point holding.tw.
69. process accupressure.tw.
70. rebalancing.tw.
71. reflex zone massage.tw.
72. reflexognosy.tw.
73. reflexology.tw.
74. reposturing dynamics.tw.
75. rolfing.tw.
76. (Rosen adj1 (method\$ or massage)).tw.
77. russian massage.tw.
78. Shiatsu.tw.
79. shiatzu.tw.
80. exp shiatsu/
81. (soft tissue adj1 (manipulat\$ or mobilizat\$ or release)).tw.
82. sport\$ massage.tw.
83. (strain-counterstrain adj1 (therap\$ or massage or technique)).tw.
84. structural integrat\$.tw.
85. swedish massage.tw.
86. tactile stimulat\$.tw.
87. thai massage.tw.
88. tibetan massage.tw.
89. tibetan point holding.tw.
90. (trager adj1 (approach or technique or therap\$ or massage)).tw.
91. triggerpoint massage.tw.
92. Tuina.tw.
93. tui na.tw.
94. zero balanc\$.tw.
95. zhi ya.tw.
96. zhiya.tw.
97. zone therap\$.tw.
98. or/1-97
99. (exp massage/ or massage.tw.) adj3 (carotid body/ or exp carotid arteries/ or carotid.tw. or heart.tw. or cardiac.tw. or sinus.tw. or uterine.tw. or udder.tw. or prostatic.tw. or prostate.tw. or cornea.tw. or ocular.tw. or intraocular pressure/ or glaucoma/ or decubitus ulcer.mp. or vagal.mp.)
100. 98 not 99
101. (ae or co or et).fs.

102. ((Side or Advers\$) adj3 (effect\$ or affect\$ or reaction\$ or event\$)).tw.
103. (risk\$ or harm\$ or aetiolog\$ or etiolog\$ or cause or causation or causing or causal\$ or complicat\$).tw.
104. exp risk/
105. (risk-benefit adj5 (analy\$ or ratio\$ or assess\$)).mp.
106. exp causality/
107. significant event.tw.
108. exp Safety/
109. safe\$.tw.
110. aggravation\$.tw.
111. consequences.tw.
112. injury.tw.
113. exp "Wounds and Injuries"/
114. case report\$.tw.
115. or/101-114
116. anemia.tw.
117. bruising.tw.
118. exp Hematoma/ or exp Purpura/ or exp Contusions/ or exp Hemorrhage/ or exp Ecchymosis/
119. bruise.tw.
120. carotid artery stenosis.tw.
121. exp Dislocations/
122. dislocation\$.tw.
123. exp Hearing Loss/
124. hearing loss.tw.
125. hearing deterioration.tw.
126. abscess.tw.
127. abscess/
128. displacement of stent.tw.
129. stent displacement.tw.
130. eczema.tw.
131. eczema/
132. embolization.tw.
133. exp Embolization, Therapeutic/ or exp Pulmonary Embolism/
134. fetal haemorrhage.tw.
135. fracture.tw.
136. fracture/
137. haematoma.tw.
138. hematoma.tw.
139. infection.tw.
140. nerve damage.tw.
141. pain.tw.
142. exp Pain/
143. posterior interosseous syndrome.tw.
144. pseudoaneurysm.tw.
145. exp Aneurysm, False/
146. exp Pulmonary Embolism/
147. ruptured colon.tw.
148. ruptured uterus.tw.
149. swell\$.tw.
150. strangulation.tw.
151. exp Asphyxia/ or exp Neck Injuries/
152. exp Thyrotoxicosis/
153. thyrotoxicosis.tw.
154. ulceration.tw.

155. exp Ulcer/
156. weak\$.tw.
157. or/116-156
158. 115 or 157
159. exp infant, newborn/
160. infant/
161. exp child, preschool/
162. child/
163. exp puberty/
164. minors/
165. adolescent/
166. (newborn\$ or new-born\$ or infan\$ or baby\$ or babies\$ or premie\$ or prematur\$).tw.
167. toddler\$.tw.
168. (preschool\$ or pre-school\$).tw.
169. nursery school\$.tw.
170. (kindergarten\$ or kindergarden\$).tw.
171. (child\$ or kid or kids or boy\$ or girl\$).tw.
172. elementary school\$.tw.
173. (schoolchild\$ or "school child\$").tw.
174. (schoolage\$ or school age\$).tw.
175. ("junior high\$" or "middle school\$").tw.
176. youth\$.tw.
177. (teen\$ or adolescen\$ or juvenil\$ or "young adult\$" or pubert\$ or underage\$ or "under age\$").tw.
178. (pubescen\$ or pre-pubescen\$ or prepubescen\$ or post-pubescen\$ or postpubescen\$).tw.
179. secondary school\$.tw.
180. (high school\$ or highschool\$).tw.
181. exp Pediatrics/
182. pediatric\$.tw.
183. paediatric.tw.
184. or/159-183
185. 100 and 158 and 184
